# Supplementary material
Source: publisher figshare collection journal article supplement (https://acs.figshare.com/ndownloader/files/18019448)
Supplement: Supplementary file 1 [file 18019448]

## SUPPORTING INFORMATION

# Chiral *N*-Heterocyclic-Carbene-Catalyzed Cascade Asymmetric Desymmetrization of Cyclopentenediones with Enals: Access to Optically Active 1,3-Indandione Derivatives

Jia-Ming Hu<sup>a</sup>, Jun-Qi Zhang<sup>a</sup>, Bing-Bing Sun<sup>a</sup>, Jun-Bo Chen<sup>a</sup>, Jie-Qiang Yu<sup>a</sup>, Xiao-Peng Yang<sup>a</sup>, Hao-Peng Lv<sup>a</sup>, Zheng Wang<sup>b\*</sup> and Xing-Wang Wang<sup>\*a</sup>

<sup>a</sup> Key Laboratory of Organic Synthesis of Jiangsu Province, College of Chemistry, Chemical Engineering and Materials Science, Soochow University, Suzhou 215123, China

<sup>b</sup> State Key Laboratory of Organometallic Chemistry, Center for Excellence in Molecular Synthesis, Shanghai Institute of Organic Chemistry, Chinese Academy of Sciences, Shanghai 200032, China

E-mail: wangxw@suda.edu.cn; wzsioc@mail.sioc.ac.cn

## Contents

|                                                                  |    |
|------------------------------------------------------------------|----|
| I: General methods .....                                         | 1  |
| II: General and Typical experimental procedures .....            | 2  |
| III: Experimental screening details .....                        | 5  |
| IV: Crystal data and ORTEP diagram for compound <b>3ad</b> ..... | 8  |
| V: Characterization of products .....                            | 9  |
| VI: NMR spectra of new compounds.....                            | 25 |
| VII: HPLC profile spectrum of compounds .....                    | 64 |

## I: General methods

Unless otherwise noted, all reactions were carried out under an atmosphere of nitrogen in oven-dried Schlenk tube with magnetic stirring, all reagents obtained from commercial suppliers were used without further purification. Reactions were monitored by thin-layer chromatography (TLC) on silica gel precoated glass plates ( $0.2 \pm 0.03$  mm thickness, GF-254, particle size 0.01–0.04 mm) from Yantai Chemical Industry Research Institute. TLC were visualized by UV fluorescence (254 nm). Flash column chromatography was performed with silica gel (particle size 0.04–0.05 mm).  $^1\text{H}$  NMR,  $^{13}\text{C}$  NMR and  $^{19}\text{F}$  NMR spectroscopic data were recorded using Bruker AMX-400 instrument and calibrated by using the residual solvent peaks as an internal reference ( $\text{CDCl}_3$  [ $^1\text{H}$ : 7.26,  $^{13}\text{C}$ : 77.23]). Coupling constants ( $J$ ) are given in Hz. High-resolution mass spectra (HRMS) for all the compounds were determined on a Micromass GCT-TOF mass spectrometer with ESI or CI resource. High performance liquid chromatography (HPLC) was performed on Agilent 1200 Series chromatographs using a Daicel Chiralpak AD-H, IG-H, IA-H, AS-H (0.46 cm  $\times$  25 cm). X-ray data were recorded on a Rigaku Mercury CCD/AFC diffractometer. Optical rotations are reported as follows:  $[\alpha]_{\text{D}}^{20}$  ( $c$  in g per 100 mL, solvent).

## II: General and Typical experimental procedures

### General procedure for the catalytic synthesis of products **3**:

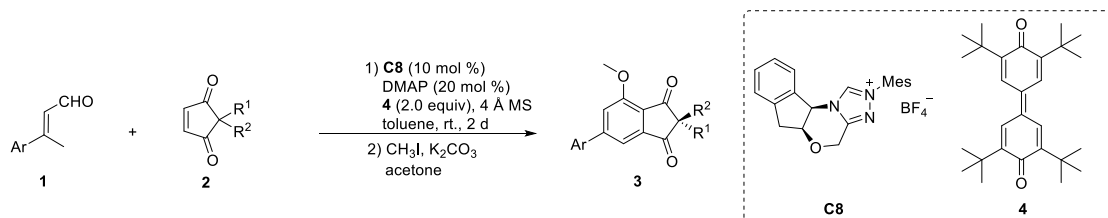

To a 25 mL pre-dried round-bottom Schlenk tube with a magnetic stir bar, were added 4 Å MS (160 mg), oxidant **4** (164 mg, 2.0 equiv), 2,2-disubstituted cyclopentenediones **2** (0.2 mmol, 1.0 equiv), triazolium salt **C8** (8.4 mg, 0.02 mmol, 0.1 equiv), DMAP (5.2 mg, 0.04 mmol, 0.2 equiv) and  $\beta,\beta$ -disubstituted enals **1** (0.3 mmol, 1.5 equiv), followed by an addition of anhydrous toluene (2 mL). Then the Schlenk tube was closed with septum and the reaction mixture was stirred at room temperature for two days. After completion of the reaction monitored by TLC, the reaction mixture went through fast flash column chromatography to yield the crude products. Next, to the solution of crude products (calculated as 1.0 equiv) in anhydrous acetone (2 mL), was included K<sub>2</sub>CO<sub>3</sub> (2.0 equiv) and CH<sub>3</sub>I (2.0 equiv), and the reaction mixture was stirred at room temperature about 2 hours. After the completion of the reaction monitored by TLC, solvent was removed under vacuum. The crude products were purified by flash column chromatography (PE/EA = 6/1) to provide **3**.

Note: The racemic samples described in this work were synthesized according above procedure, which were catalyzed by mixed **C8** and *ent*-**C8** as ligands in a 1:1 ratio.

### Typical procedure for the scale up synthesis of products **3aa**:

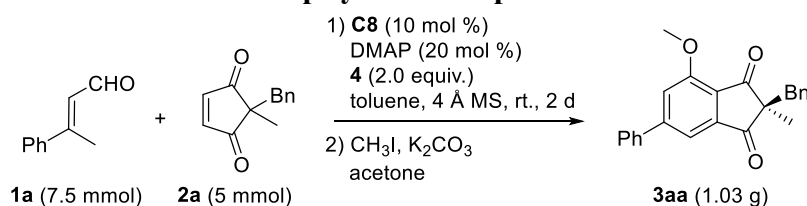

To a 100 mL pre-dried round-bottom Schlenk tube with a magnetic stir bar, were added 4 Å MS (2.0 g), oxidant **4** (4.0 g, 2.0 equiv), 2,2-disubstituted

cyclopentenediones **2a** (1.0 g, 5.0 mmol, 1.0 equiv), triazolium salt **C8** (0.21 g, 0.5 mmol, 0.1 equiv), DMAP (0.13 g, 1.0 mmol, 0.2 equiv) and  $\beta,\beta$ -disubstituted enals **1a** (1.10 g, 7.5 mmol, 1.5 equiv), followed by an addition of 50 mL anhydrous toluene. Then the Schlenk tube was closed with septum and the reaction mixture was stirred at room temperature for two days. After completion of the reaction monitored by TLC, the reaction mixture went through fast flash column chromatography to yield the crude products. Next, to the solution of crude products (1.06 g) in anhydrous acetone (30 mL), was added  $K_2CO_3$  (0.84 g, 2.0 equiv) and  $CH_3I$  (0.86 g, 0.38 mL, 2.0 equiv) and the reaction mixture was stirred at room temperature. When the reaction was complete monitored by TLC, the solvent was removed under vacuum. The mixtures were purified by flash column chromatography (PE/EA = 6/1) to furnished the desired products **3a** in overall 58% yield (1.03 g) with 87% ee.

#### Transformation of **3aa** to **4**

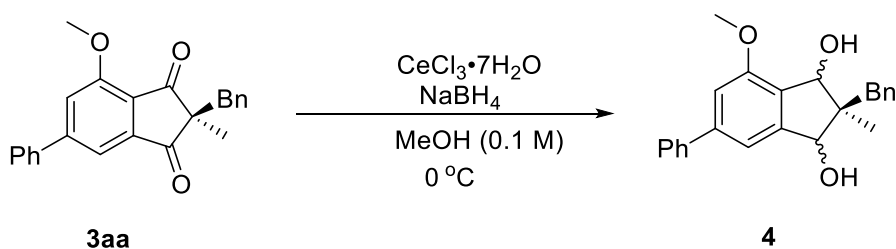

To a dry 25 mL Schlenk tube, equipped with a magnetic stir bar, was added **3aa** (36 mg, 0.1 mmol, 1.0 equiv) and  $CeCl_3 \cdot 7H_2O$  (75 mg, 0.2 mmol, 2.0 equiv), followed by an addition of 1 mL absolute methanol under Argon and the reaction mixture was cooled to 0 °C. Then  $NaBH_4$  was added (8 mg, 0.2 mmol, 2.0 equiv) at once and the reaction mixture stirred at 0 °C. After 30 min, the reaction mixture solution was quenched with 2 mL saturated  $NH_4Cl$  solution and diluted with  $CH_2Cl_2$ . Organic phase was separated from aqueous phase, the aqueous layer was extracted twice with  $CH_2Cl_2$ . Combined organic phase was dried over anhydrous  $Na_2SO_4$ , concentrated under vacuum and purified by flash column chromatography (PE/EA = 5/1) to give a white solid product **4**.

#### Transformation of **3at** to **5**

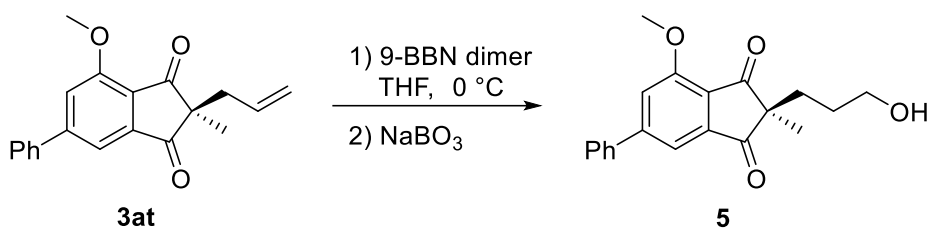

In a 25 mL of Schlenk tube equipped with a magnetic stirring bar, 9-BBN dimer (72.6 mg, 0.3 mmol) was dissolved in anhydrous THF (2 mL), and the resulting solution was cooled to 0 °C. After the mixture was stirred for 5 min, a solution of **3at** (61.3 mg, 0.20 mmol) in THF (1 mL) was added to the reaction flask at 0 °C and stirred for about 12 h until the substrate was consumed. Then NaBO<sub>3</sub> (400 mg) in water (6 mL) was added to the reaction flask, and the resulting mixture was stirred at room temperature for 6 h. The organic layer was separated, and the aqueous layer was extracted with EtOAc (3 × 10 mL). The combined organic layers were washed with the saturated aqueous NaCl solution, dried over Na<sub>2</sub>SO<sub>4</sub>, and finally evaporated under reduced pressure. Purification of the crude product was performed with flash chromatography (PE/EA = 2/1) to give the pure product **5** as a white solid.

#### Transformation of **3ad** to **6**

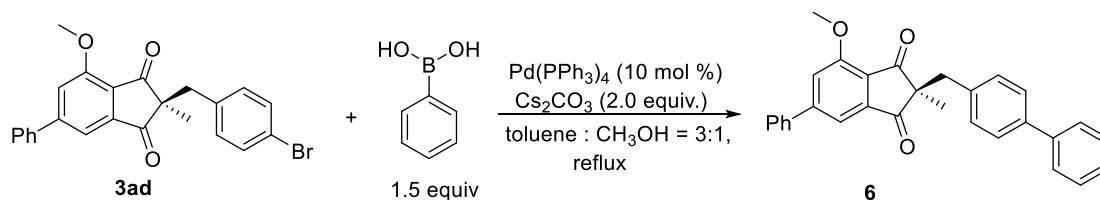

In a 25 mL of Schlenk tube, equipped with a magnetic stirring bar, was added **3ad** (79 mg, 0.18 mmol), phenylboronic acid (32.9 mg, 0.27 mmol, 1.5 equiv), Pd(PPh<sub>3</sub>)<sub>4</sub> (20.8 mg, 0.018 mmol, 0.1 equiv) and Cs<sub>2</sub>CO<sub>3</sub> (117.3 mg, 0.36 mmol, 2.0 equiv) in toluene/CH<sub>3</sub>OH (3/1, 4 mL) solution. Then, the mixture was degassed under N<sub>2</sub> for 30 min at −78 °C. Subsequently, the resulting mixture was stirred and heated to reflux for overnight. After complete consumption of starting material, the mixture was cooled to room temperature, passed through a pad of celite and extracted with ethyl acetate. Combined organic layer was washed with water and brine, dried over Na<sub>2</sub>SO<sub>4</sub> and concentrated to give a crude product. Finally, it was purified by column

chromatography on silica gel with PE/EA (4/1) to give the pure product **6** as a white solid.

### Transformation of **3da** to **7**

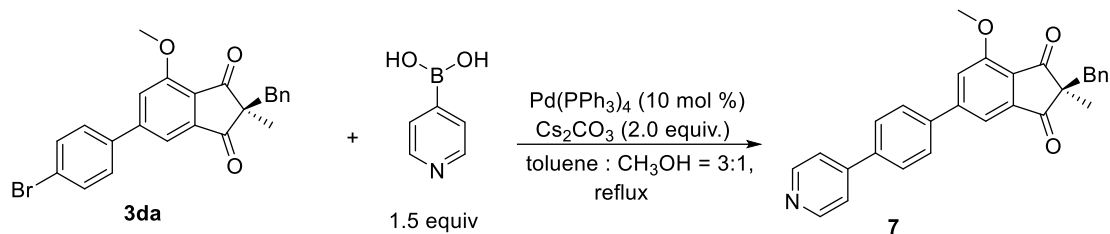

In a 25 mL of Schlenk tube, equipped with a magnetic stirring bar, was added **3da** (79 mg, 0.18 mmol), pyridine-4-boric acid (33.2 mg, 0.27 mmol, 1.5 equiv), Pd(PPh<sub>3</sub>)<sub>4</sub> (20.8 mg, 0.018 mmol, 0.1 equiv) and Cs<sub>2</sub>CO<sub>3</sub> (117.3 mg, 0.36 mmol, 2.0 equiv) in toluene/CH<sub>3</sub>OH (3/1, 4 mL) solution. Then, the mixture was degassed under N<sub>2</sub> for 30 min at −78 °C. Subsequently, the resulting mixture was stirred and heated to reflux for overnight. After complete consumption of starting material, the mixture was cooled to room temperature, passed through a pad of celite and extracted with ethyl acetate. Combined organic layer was washed with water and brine, dried over Na<sub>2</sub>SO<sub>4</sub> and concentrated to give a crude product. Finally, it was purified by column chromatography on silica gel with PE/EA (1/1) to give the pure product **7** as a white solid.

## III: Experimental screening details

**Table S1.** Screening of NHC precatalysts.

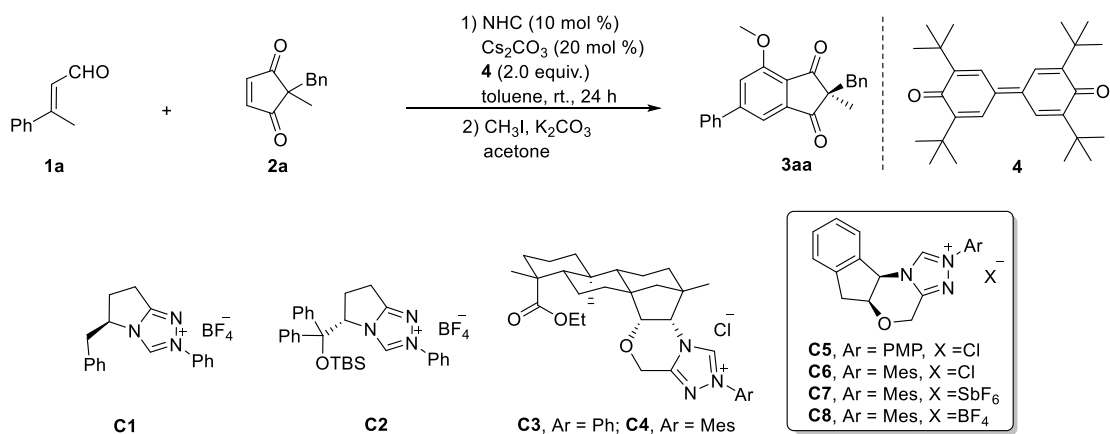

| entry <sup>a</sup> | cat.      | yield <sup>b</sup><br>(%) | ee <sup>c</sup><br>(%) |
|--------------------|-----------|---------------------------|------------------------|
| 1                  | <b>C1</b> | nr                        | --                     |
| 2                  | <b>C2</b> | nr                        | --                     |
| 3                  | <b>C3</b> | nr                        | --                     |
| 4                  | <b>C4</b> | nr                        | --                     |
| 5                  | <b>C5</b> | nr                        | --                     |
| 6                  | <b>C6</b> | 52                        | 74                     |
| 7                  | <b>C7</b> | 48                        | 74                     |
| 8                  | <b>C8</b> | 54                        | 80                     |

<sup>a</sup> Reaction conditions: **1a** (0.075 mmol, 1.5 equiv), **2a** (0.05 mmol, 1.0 equiv), NHC (10 mol %), Cs<sub>2</sub>CO<sub>3</sub> (20 mol %), **4** (0.1 mmol, 2.0 equiv), toluene (1 mL), rt, 24 hours. <sup>b</sup> Isolated yield. <sup>c</sup> Determined by HPLC.

**Table S2.** Screening of bases.

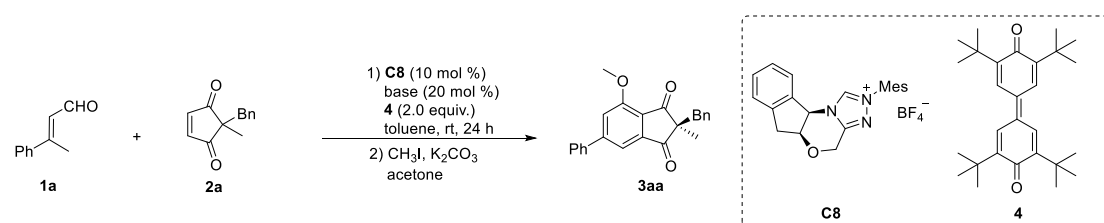

| entry <sup>a</sup> | base                             | yield <sup>b</sup><br>(%) | ee <sup>c</sup><br>(%) |
|--------------------|----------------------------------|---------------------------|------------------------|
| 1                  | Li <sub>2</sub> CO <sub>3</sub>  | nr                        | --                     |
| 2                  | Na <sub>2</sub> CO <sub>3</sub>  | 47                        | 75                     |
| 3                  | K <sub>2</sub> CO <sub>3</sub>   | 50                        | 76                     |
| 4                  | CaCO <sub>3</sub>                | nr                        | --                     |
| 5                  | BaCO <sub>3</sub>                | nr                        | --                     |
| 6                  | NaOAc                            | nr                        | --                     |
| 7                  | KOAc                             | 48                        | 78                     |
| 8                  | Na <sub>3</sub> PO <sub>4</sub>  | 50                        | 80                     |
| 9                  | K <sub>3</sub> PO <sub>4</sub>   | 52                        | 83                     |
| 10                 | Na <sub>2</sub> HPO <sub>4</sub> | nr                        | --                     |
| 11                 | NaOCH <sub>3</sub>               | nr                        | --                     |
| 12                 | NaO <sup>t</sup> Bu              | nr                        | --                     |
| 13                 | KO <sup>t</sup> Bu               | nr                        | --                     |
| 14                 | Et <sub>3</sub> N                | trace                     | n.d.                   |
| 15                 | DBACO                            | 52                        | 82                     |
| 16                 | DBU                              | 54                        | 83                     |
| 17                 | TMEDA                            | trace                     | n.d.                   |
| 18                 | DMAP                             | 53                        | 86                     |

<sup>a</sup> Reaction conditions: **1a** (0.075 mmol, 1.5 equiv), **2a** (0.05 mmol, 1.0 equiv), **C8** (10 mol %), base (20 mol %), **4** (0.1 mmol, 2.0 equiv), toluene (1 mL), rt, 24 hours. <sup>b</sup> Isolated yield. <sup>c</sup> Determined by HPLC.

**Table S3.** Screening of solvents, reaction temperature and additives.

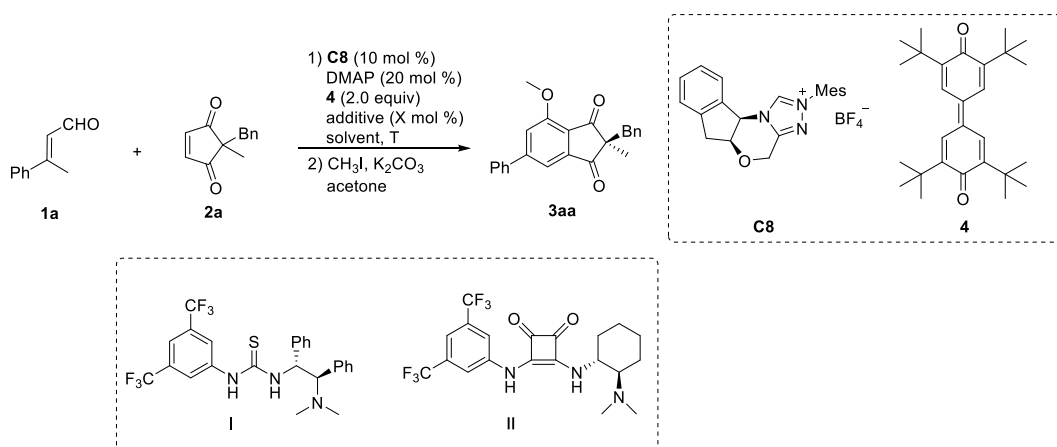

| entry <sup>a</sup> | solvent            | additive                        | X<br>(mol %) | T<br>(°C) | yield <sup>b</sup><br>(%) | ee <sup>c</sup><br>(%) |
|--------------------|--------------------|---------------------------------|--------------|-----------|---------------------------|------------------------|
| 1                  | <i>p</i> -xylene   | --                              | --           | rt        | 49                        | 85                     |
| 2                  | <i>m</i> -xylene   | --                              | --           | rt        | 51                        | 85                     |
| 3                  | mesitylene         | --                              | --           | rt        | 54                        | 83                     |
| 4                  | ethylbenzene       | --                              | --           | rt        | 46                        | 86                     |
| 5                  | fluorobenzene      | --                              | --           | rt        | 23                        | 81                     |
| 6                  | pentafluorobenzene | --                              | --           | rt        | 22                        | 76                     |
| 7                  | DCM                | --                              | --           | rt        | 46                        | 40                     |
| 8                  | DCE                | --                              | --           | rt        | 45                        | 45                     |
| 9                  | 1,4-dioxane        | --                              | --           | rt        | 52                        | 82                     |
| 10                 | Et <sub>2</sub> O  | --                              | --           | rt        | 45                        | 87                     |
| 11                 | MTBE               | --                              | --           | rt        | 38                        | 89                     |
| 12                 | toluene            | --                              | --           | 0         | < 5%                      | --                     |
| 13                 | toluene            | --                              | --           | 40        | 56                        | 84                     |
| 14                 | toluene            | Sc(OTf) <sub>3</sub>            | 20           | rt        | nr                        | --                     |
| 15                 | toluene            | Mg(OTf) <sub>2</sub>            | 20           | rt        | nr                        | --                     |
| 16                 | toluene            | LiCl                            | 20           | rt        | trace                     | n.d.                   |
| 17                 | toluene            | I                               | 20           | rt        | 33                        | 82                     |
| 18                 | toluene            | II                              | 20           | rt        | 31                        | 84                     |
| 19                 | toluene            | Na <sub>2</sub> SO <sub>4</sub> | 20 mg        | rt        | 46                        | 88                     |
| 20                 | toluene            | MgSO <sub>4</sub>               | 20 mg        | rt        | 43                        | 86                     |
| 21                 | toluene            | 3 Å MS                          | 20 mg        | rt        | 55                        | 85                     |
| 22                 | toluene            | 4 Å MS                          | 20 mg        | rt        | 54                        | 90                     |
| 23                 | toluene            | 5 Å MS                          | 20 mg        | rt        | 35                        | 88                     |
| 24                 | toluene            | 4 Å MS                          | 40 mg        | rt        | 55                        | 90                     |
| 25                 | toluene            | 4 Å MS                          | 60 mg        | rt        | 50                        | 90                     |
| 26 <sup>d</sup>    | toluene            | 4 Å MS                          | 40 mg        | rt        | 60                        | 90                     |

<sup>a</sup> Reaction conditions: **1a** (0.075 mmol, 1.5 equiv), **2a** (0.05 mmol, 1.0 equiv), **C8** (10 mol %), DMAP (20 mol %), **4** (0.1 mmol, 2.0 equiv), solvent (1 mL), rt., 24 hours. <sup>b</sup> Isolated yield. <sup>c</sup> Determined by HPLC. <sup>d</sup> reaction time 2 days.



#### IV: Crystal data and ORTEP diagram for compound 3ad

##### X-ray data of 3ad

|                                   |                                                                                                                                                     |
|-----------------------------------|-----------------------------------------------------------------------------------------------------------------------------------------------------|
| Identification code               | mo_20190418f_0ma_a                                                                                                                                  |
| Empirical formula                 | C <sub>24</sub> H <sub>19</sub> BrO <sub>3</sub>                                                                                                    |
| Formula weight                    | 435.30                                                                                                                                              |
| Temperature                       | 149.99 K                                                                                                                                            |
| Wavelength                        | 0.71073 Å                                                                                                                                           |
| Crystal system                    | orthorhombic                                                                                                                                        |
| Space group                       | P 21 21 21                                                                                                                                          |
| Unit cell dimensions              | $a = 6.9776 (2) \text{ Å}$ $\alpha = 90^\circ$<br>$b = 14.8155 (5) \text{ Å}$ $\beta = 90^\circ$<br>$c = 19.0346 (7) \text{ Å}$ $\gamma = 90^\circ$ |
| Volume                            | 1967.73 (11) Å <sup>3</sup>                                                                                                                         |
| Z                                 | 4                                                                                                                                                   |
| Density (calculated)              | 1.469 mg/m <sup>3</sup>                                                                                                                             |
| Absorption coefficient            | 2.111 mm <sup>-1</sup>                                                                                                                              |
| F(000)                            | 888.0                                                                                                                                               |
| Crystal size                      | 0.35 × 0.3 × 0.2 mm <sup>3</sup>                                                                                                                    |
| Theta range for data collection   | 2.544 ° to 27.502 °                                                                                                                                 |
| Index ranges                      | -9 ≤ h ≤ 9, -19 ≤ k ≤ 19, -24 ≤ l ≤ 24                                                                                                              |
| Reflections collected             | 50231                                                                                                                                               |
| Independent reflections           | 4510 [R <sub>int</sub> = 0.0562]                                                                                                                    |
| Completeness to theta = 25.00°    | 99.5%                                                                                                                                               |
| Absorption correction             | Semi-empirical from equivalents                                                                                                                     |
| Refinement method                 | Full-matrix least-squares on F <sup>2</sup>                                                                                                         |
| Data / restraints / parameters    | 4510 / 0 / 256                                                                                                                                      |
| Goodness-of-fit on F <sup>2</sup> | 1.035                                                                                                                                               |
| Final R indices [I > 2σ(I)]       | R <sub>1</sub> = 0.0237, wR <sub>2</sub> = 0.0551                                                                                                   |

|                              |                                     |
|------------------------------|-------------------------------------|
| R indices (all data)         | $R_1 = 0.0277$ , $wR_2 = 0.0567$    |
| Absolute structure parameter | 0.015(8)                            |
| Largest diff. peak and hole  | 0.265 and -0.413 e. Å <sup>-3</sup> |

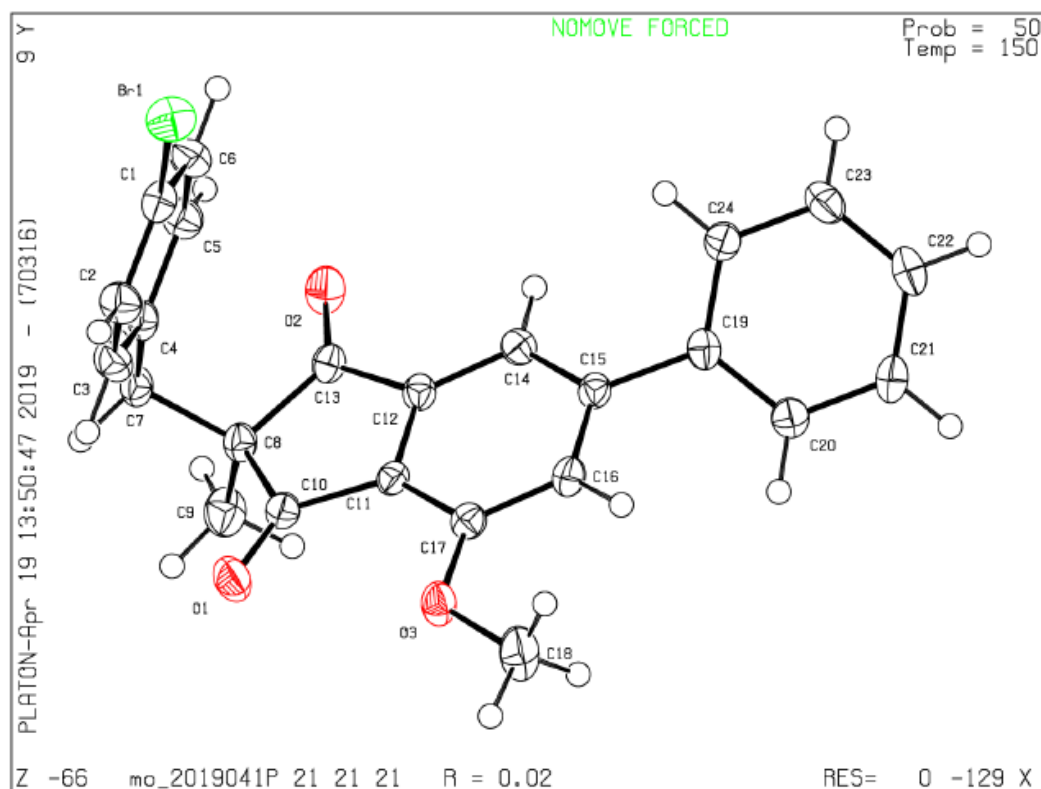

Figure S1. ORTEP drawing of **3ad**

The crystal was prepared from the solution of **3ad** in petroleum n-hexane/dichloromethane. CCDC 1911223 contains the supplementary crystallographic data for this paper. These data can be obtained free of charge from The Cambridge Crystallographic Data Centre via [www.ccdc.cam.ac.uk/data\\_request/cif](http://www.ccdc.cam.ac.uk/data_request/cif).

## V: Characterization of products

### (*S*)-2-Benzyl-4-methoxy-2-methyl-6-phenyl-1H-indene-1,3(2H)-dione (**3aa**).

39.8 mg, overall 60% yield, white solid, m. p. 90 – 91 °C; 90% ee. The ee value was determined by HPLC [Daicel Chiralpak AD-H with hexane/*i*-PrOH (90:10) as the eluent, flow: 1.0 mL min<sup>-1</sup>, λ = 254 nm]: major diastereoisomer t (major) = 10.82, t

(minor) = 14.64;  $[\alpha]_{\text{D}}^{20} = -10.0$  (*c* 1, CHCl<sub>3</sub>); <sup>1</sup>H NMR (400 MHz, CDCl<sub>3</sub>) δ 7.65 – 7.51 (m, 3H), 7.49 – 7.36 (m, 3H), 7.29 (d, *J* = 1.2 Hz, 1H), 7.15 – 6.90 (m, 5H), 4.01 (s, 3H), 3.30 – 2.98 (m, 2H), 1.38 (s, 3H). <sup>13</sup>C NMR (101 MHz, CDCl<sub>3</sub>) δ 204.4, 201.2, 157.5, 150.9, 143.9, 139.1, 136.2, 129.9, 129.2, 129.1, 128.1, 127.4, 127.3, 126.6, 116.3, 113.2, 56.5, 56.4, 41.2, 20.8. IR (neat, cm<sup>-1</sup>): 1733, 1699, 1600, 1494, 1173, 1103, 1054, 996, 872, 801, 760, 701, 635. HRMS (ESI): calcd. for C<sub>24</sub>H<sub>20</sub>O<sub>3</sub>Na<sup>+</sup> [*M* + Na]<sup>+</sup> 379.1305; found: 379.1305.

**(*S*)-2-(4-Fluorobenzyl)-4-methoxy-2-methyl-6-phenyl-1H-indene-1,3(2H)-dione (3ab).** 38.2 mg, overall 51% yield, white solid, m. p. 73 – 74 °C; 90% ee. The ee value was determined by HPLC [Daicel Chiralpak AD-H with hexane/*i*-PrOH (90:10) as the eluent, flow: 1.0 mL min<sup>-1</sup>, λ = 254 nm]: major diastereoisomer *t* (major) = 11.93, *t* (minor) = 13.71;  $[\alpha]_{\text{D}}^{20} = -12.9$  (*c* 1, CHCl<sub>3</sub>); <sup>1</sup>H NMR (400 MHz, CDCl<sub>3</sub>) δ 7.58 (td, *J* = 4.0, 1.6 Hz, 3H), 7.52 – 7.38 (m, 3H), 7.32 (d, *J* = 1.2 Hz, 1H), 7.11 – 6.89 (m, 2H), 6.74 (t, *J* = 8.8 Hz, 2H), 4.03 (s, 3H), 3.25 – 2.97 (m, 2H), 1.37 (s, 3H). <sup>13</sup>C NMR (101 MHz, CDCl<sub>3</sub>) δ 204.3, 201.1, 162.9, 160.4, 157.5, 151.1, 143.8, 139.0, 131.4 (d, *J*<sub>C-F</sub> = 8.0 Hz) 129.2, 129.1, 127.5, 127.3, 116.4, 114.9 (d, *J*<sub>C-F</sub> = 21.0 Hz), 113.3, 56.5, 56.4, 40.1, 20.9. <sup>19</sup>F NMR (376 MHz, CDCl<sub>3</sub>) δ -116.2 (Ar-F). IR (neat, cm<sup>-1</sup>): 1737, 1700, 1601, 1570, 1509, 1333, 1220, 997, 872, 820, 764, 751, 696. HRMS (ESI): calcd. for C<sub>24</sub>H<sub>19</sub>FO<sub>3</sub>Na<sup>+</sup> [*M* + Na]<sup>+</sup> 397.1210; found: 397.1208.

**(*S*)-2-(4-Chlorobenzyl)-4-methoxy-2-methyl-6-phenyl-1H-indene-1,3(2H)-dione (3ac).** 43.0 mg, overall 55% yield, white solid, m. p. 145 – 146 °C; 89% ee. The ee value was determined by HPLC [Daicel Chiralpak AD-H with hexane/*i*-PrOH (90:10) as the eluent, flow: 1.0 mL min<sup>-1</sup>, λ = 254 nm]: major diastereoisomer *t* (major) = 13.23, *t* (minor) = 15.42;  $[\alpha]_{\text{D}}^{20} = -28.7$  (*c* 1, CHCl<sub>3</sub>); <sup>1</sup>H NMR (400 MHz, CDCl<sub>3</sub>) δ 7.68 – 7.53 (m, 3H), 7.54 – 7.40 (m, 3H), 7.35 (d, *J* = 1.2 Hz, 1H), 7.12 – 6.93 (m, 4H), 4.06 (s, 3H), 3.23 – 3.03 (m, 2H), 1.39 (s, 3H). <sup>13</sup>C NMR (101 MHz, CDCl<sub>3</sub>) δ 204.1, 201.0, 157.6, 151.2, 143.7, 139.0, 134.7, 132.5, 131.3, 129.2, 129.2, 128.3, 127.5, 127.2, 116.5, 113.3, 56.4, 56.3, 40.1, 21.1. IR (neat, cm<sup>-1</sup>): 1735, 1700, 1604, 1568, 1449, 1407, 1368,

1337, 1255, 1236, 1171, 1100, 995, 871, 816, 772, 762, 698. HRMS (ESI): calcd. for  $C_{24}H_{20}ClO_3^+$   $[M + H]^+$  391.1095; found: 391.1095.

**(S)-2-(4-Bromobenzyl)-4-methoxy-2-methyl-6-phenyl-1H-indene-1,3(2H)-dione**

**(3ad).** 51.2 mg, overall 59% yield, white solid, m. p. 156 – 157 °C; 87% ee. The ee value was determined by HPLC [Daicel Chiralpak AD-H with hexane/*i*-PrOH (90:10) as the eluent, flow: 1.0 mL min<sup>-1</sup>,  $\lambda$  = 254 nm]: major diastereoisomer t (major) = 13.93, t (minor) = 15.98;  $[\alpha]_D^{20}$  = -38.6 (*c* 1, CHCl<sub>3</sub>); <sup>1</sup>H NMR (400 MHz, CDCl<sub>3</sub>)  $\delta$  7.67 – 7.53 (m, 3H), 7.52 – 7.39 (m, 3H), 7.34 (d, *J* = 1.2 Hz, 1H), 7.23 – 7.12 (m, 2H), 7.00 – 6.87 (m, 2H), 4.04 (s, 3H), 3.18 – 2.99 (m, 2H), 1.37 (s, 3H). <sup>13</sup>C NMR (101 MHz, CDCl<sub>3</sub>)  $\delta$  204.1, 200.9, 157.6, 151.2, 143.6, 139.0, 135.3, 131.7, 131.2, 129.2, 129.1, 127.5, 127.1, 120.7, 116.5, 113.4, 56.4, 56.3, 40.1, 21.2. IR (neat, cm<sup>-1</sup>): 1734, 1698, 1602, 1407, 1233, 1180, 1154, 1099, 1072, 1040, 922, 871, 803, 768, 712, 632. HRMS (ESI): calcd. for  $C_{24}H_{20}BrO_3^+$   $[M + H]^+$  435.0590; found: 435.0590.

**(S)-4-Methoxy-2-methyl-2-(4-methylbenzyl)-6-phenyl-1H-indene-1,3(2H)-dione**

**(3ae).** 41.5 mg, overall 56% yield, white solid, m. p. 101 – 102 °C; 91% ee. The ee value was determined by HPLC [Daicel Chiralpak AD-H with hexane/*i*-PrOH (90:10) as the eluent, flow: 1.0 mL min<sup>-1</sup>,  $\lambda$  = 254 nm]: major diastereoisomer t (major) = 10.63, t (minor) = 16.29;  $[\alpha]_D^{20}$  = -6.0 (*c* 1, CHCl<sub>3</sub>); <sup>1</sup>H NMR (400 MHz, CDCl<sub>3</sub>)  $\delta$  7.57 (dd, *J* = 8.4, 1.6 Hz, 3H), 7.50 – 7.38 (m, 3H), 7.31 (d, *J* = 1.2 Hz, 1H), 6.94 (d, *J* = 8.0 Hz, 2H), 6.87 (d, *J* = 8.0 Hz, 2H), 4.03 (s, 3H), 3.20 – 3.02 (m, 2H), 2.14 (s, 3H), 1.36 (s, 3H). <sup>13</sup>C NMR (101 MHz, CDCl<sub>3</sub>)  $\delta$  204.4, 201.4, 157.5, 150.8, 143.9, 139.1, 136.0, 133.1, 129.8, 129.2, 129.1, 128.8, 127.4, 127.3, 116.3, 113.3, 56.5, 56.4, 40.7, 21.0, 20.9. IR (neat, cm<sup>-1</sup>): 1736, 1702, 1600, 1568, 1368, 1337, 1254, 1233, 1171, 1101, 1056, 996, 943, 869, 765, 699. HRMS (ESI): calcd. For  $C_{25}H_{23}O_3^+$   $[M + H]^+$  371.1642; found: 371.1628.

**(S)-4-Methoxy-2-methyl-6-phenyl-2-(4-(trifluoromethyl)benzyl)-1H-indene-**

**1,3(2H)-dione (3af).** 48.4 mg, overall 57% yield, white solid, m. p. 140 – 141 °C; 86% ee. The ee value was determined by HPLC [Daicel Chiralpak AD-H with hexane/*i*-PrOH (90:10) as the eluent, flow: 1.0 mL min<sup>-1</sup>,  $\lambda$  = 254 nm]: major diastereoisomer t

(major) = 10.41, t (minor) = 12.95;  $[\alpha]_{\text{D}}^{20} = -7.9$  (c 1, CHCl<sub>3</sub>); <sup>1</sup>H NMR (400 MHz, CDCl<sub>3</sub>) δ 7.63 – 7.53 (m, 3H), 7.51 – 7.38 (m, 3H), 7.37 – 7.29 (m, 3H), 7.19 (d, *J* = 8.0 Hz, 2H), 4.03 (s, 3H), 3.26 – 3.12 (m, 2H), 1.40 (s, 3H). <sup>13</sup>C NMR (101 MHz, CDCl<sub>3</sub>) δ 203.8, 200.6, 157.6, 151.3, 143.5, 140.4, 139.0, 130.3, 129.3, 129.2, 128.7, 127.5, 127.0, 125.1 (q, *J*<sub>C-F</sub> = 3.8 Hz), 116.5, 113.4, 56.4, 56.3, 40.3, 21.3. <sup>19</sup>F NMR (376 MHz, CDCl<sub>3</sub>) δ –62.5 (Ar–F). IR (neat, cm<sup>–1</sup>): 1738, 1703, 1602, 1570, 1325, 1254, 1235, 1159, 1121, 1099, 1066, 997, 703, 633. HRMS (ESI): calcd. For C<sub>25</sub>H<sub>19</sub>F<sub>3</sub>O<sub>3</sub>Na<sup>+</sup> [M + Na]<sup>+</sup> 447.1179; found: 447.1183.

**(S)-4-Methoxy-2-methyl-2-(4-nitrobenzyl)-6-phenyl-1H-indene-1,3(2H)-dione**

**(3ag).** 69.8 mg, overall 87% yield, white solid, m. p. 175 – 176 °C; 89% ee. The ee value was determined by HPLC [Daicel Chiralpak AD-H with hexane/*i*-PrOH (90:10) as the eluent, flow: 1.0 mL min<sup>–1</sup>, λ = 254 nm]: major diastereoisomer t (major) = 28.11, t (minor) = 31.53;  $[\alpha]_{\text{D}}^{20} = -30.9$  (c 1, CHCl<sub>3</sub>); <sup>1</sup>H NMR (400 MHz, CDCl<sub>3</sub>) δ 8.01 – 7.84 (m, 2H), 7.65 – 7.50 (m, 3H), 7.50 – 7.38 (m, 3H), 7.34 (d, *J* = 1.2 Hz, 1H), 7.27 – 7.18 (m, 2H), 4.04 (s, 3H), 3.30 – 3.14 (m, 2H), 1.41 (s, 3H). <sup>13</sup>C NMR (101 MHz, CDCl<sub>3</sub>) δ 203.5, 200.3, 157.7, 151.5, 146.8, 144.0, 143.3, 138.8, 130.9, 129.4, 129.2, 127.5, 126.8, 123.4, 116.7, 113.4, 56.4, 56.3, 40.0, 21.4. IR (neat, cm<sup>–1</sup>): 1735, 1699, 1600, 1568, 1517, 1452, 1099, 998, 830, 775, 766, 720, 698. HRMS (ESI): calcd. for C<sub>24</sub>H<sub>19</sub>NO<sub>5</sub>Na<sup>+</sup> [M + Na]<sup>+</sup> 424.1155; found: 424.1154.

**(S)-2-(3-Chlorobenzyl)-4-methoxy-2-methyl-6-phenyl-1H-indene-1,3(2H)-dione**

**(3ah).** 31.2 mg, overall 40% yield, white solid, m. p. 46 – 47 °C; 87% ee. The ee value was determined by HPLC [Daicel Chiralpak AD-H with hexane/*i*-PrOH (90:10) as the eluent, flow: 1.0 mL min<sup>–1</sup>, λ = 254 nm]: major diastereoisomer t (major) = 10.89, t (minor) = 13.79;  $[\alpha]_{\text{D}}^{20} = +4.3$  (c 1, CHCl<sub>3</sub>); <sup>1</sup>H NMR (400 MHz, CDCl<sub>3</sub>) δ 7.63 – 7.54 (m, 3H), 7.51 – 7.40 (m, 3H), 7.33 (d, *J* = 1.2 Hz, 1H), 7.06 (s, 1H), 7.03 – 6.98 (m, 2H), 6.98 – 6.90 (m, 1H), 4.04 (s, 3H), 3.17 – 3.03 (m, 2H), 1.38 (s, 3H). <sup>13</sup>C NMR (101 MHz, CDCl<sub>3</sub>) δ 203.9, 200.7, 157.6, 151.1, 143.7, 139.0, 138.2, 133.8, 129.9, 129.4, 129.2, 129.2, 128.2, 127.5, 127.2, 126.9, 116.5, 113.4, 56.4, 56.3, 40.5, 20.9. IR (neat, cm<sup>–1</sup>): 1737, 1699, 1600, 1449, 1371, 1332, 1207, 1079, 997, 924, 869, 787, 758,

697, 564, 469. HRMS (ESI): calcd. for  $C_{24}H_{20}ClO_3^+$   $[M + H]^+$  391.1095; found: 391.1096.

**(S)-2-(3-Bromobenzyl)-4-methoxy-2-methyl-6-phenyl-1H-indene-1,3(2H)-dione**

**(3ai).** 36.6 mg, overall 42% yield, white solid, m. p. 49 – 50 °C; 86% ee. The ee value was determined by HPLC [Daicel Chiralpak AD-H with hexane/*i*-PrOH (90:10) as the eluent, flow: 1.0 mL min<sup>-1</sup>,  $\lambda$  = 254 nm]: major diastereoisomer t (major) = 11.17, t (minor) = 14.06;  $[\alpha]_D^{20}$  = +12.0 (*c* 1, CHCl<sub>3</sub>); <sup>1</sup>H NMR (400 MHz, CDCl<sub>3</sub>)  $\delta$  7.64 – 7.54 (m, 3H), 7.52 – 7.39 (m, 3H), 7.33 (d, *J* = 1.2 Hz, 1H), 7.24 – 7.18 (m, 1H), 7.15 (dt, *J* = 8.0, 1.6 Hz, 1H), 7.03 – 6.88 (m, 2H), 4.04 (s, 3H), 3.17 – 3.02 (m, 2H), 1.38 (s, 3H). <sup>13</sup>C NMR (101 MHz, CDCl<sub>3</sub>)  $\delta$  203.9, 200.7, 157.6, 151.1, 143.7, 139.1, 138.5, 132.8, 129.9, 129.7, 129.3, 129.2, 128.7, 127.5, 127.2, 122.1, 116.5, 113.4, 56.4, 56.3, 40.5, 20.9. IR (neat, cm<sup>-1</sup>): 1737, 1670, 1602, 1567, 1127, 1333, 1234, 1208, 1073, 997, 869, 758, 695, 668. HRMS (ESI): calcd. for  $C_{24}H_{19}BrO_3Na^+$   $[M + Na]^+$  457.0410; found: 457.0413.

**(S)-4-Methoxy-2-(3-methoxybenzyl)-2-methyl-6-phenyl-1H-indene-1,3(2H)-dione**

**(3aj).** 33.2 mg, overall 43% yield, colorless oily liquid; 87% ee. The ee value was determined by HPLC [Daicel Chiralpak AD-H with hexane/*i*-PrOH (90:10) as the eluent, flow: 1.0 mL min<sup>-1</sup>,  $\lambda$  = 254 nm]: major diastereoisomer t (major) = 12.65, t (minor) = 17.05;  $[\alpha]_D^{20}$  = +12.0 (*c* 1, CHCl<sub>3</sub>); <sup>1</sup>H NMR (400 MHz, CDCl<sub>3</sub>)  $\delta$  7.63 – 7.53 (m, 3H), 7.52 – 7.39 (m, 3H), 7.30 (d, *J* = 1.2 Hz, 1H), 6.95 (t, *J* = 7.6 Hz, 1H), 6.64 (dt, *J* = 7.6, 1.2 Hz, 1H), 6.59 (t, *J* = 2.4 Hz, 1H), 6.55 (ddd, *J* = 3.6, 2.8, 1.2 Hz, 1H), 4.03 (s, 3H), 3.67 (s, 3H), 3.19 – 3.07 (m, 2H), 1.38 (s, 3H). <sup>13</sup>C NMR (101 MHz, CDCl<sub>3</sub>)  $\delta$  204.4, 201.2, 159.1, 157.5, 150.8, 143.9, 139.1, 137.7, 129.2, 129.2, 129.1, 127.4, 122.4, 116.3, 114.9, 113.2, 112.8, 56.4, 56.3, 55.1, 41.4, 20.8. IR (neat, cm<sup>-1</sup>): 2921, 1737, 1699, 1600, 1449, 1332, 1231, 1048, 995, 868, 760, 695, 476. HRMS (ESI): calcd. for  $C_{25}H_{22}O_4Na^+$   $[M + Na]^+$  409.1410; found: 409.1400.

**(S)-4-Methoxy-2-methyl-2-(3-methylbenzyl)-6-phenyl-1H-indene-1,3(2H)-dione**

**(3ak).** 25.9 mg, overall 35% yield, colorless oily liquid; 88% ee. The ee value was determined by HPLC [Daicel Chiralpak AD-H with hexane/*i*-PrOH (90:10) as the

eluent, flow: 1.0 mL min<sup>-1</sup>,  $\lambda$  = 254 nm]: major diastereoisomer t (major) = 8.90, t (minor) = 12.12;  $[\alpha]_{\text{D}}^{20}$  = +6.4 (*c* 1, CHCl<sub>3</sub>); <sup>1</sup>H NMR (400 MHz, CDCl<sub>3</sub>)  $\delta$  7.67 – 7.52 (m, 3H), 7.51 – 7.38 (m, 3H), 7.30 (d, *J* = 1.2 Hz, 1H), 6.95 (t, *J* = 7.6 Hz, 1H), 6.90 – 6.73 (m, 3H), 4.02 (s, 3H), 3.20 – 3.00 (m, 2H), 2.16 (s, 3H), 1.38 (s, 3H). <sup>13</sup>C NMR (101 MHz, CDCl<sub>3</sub>)  $\delta$  204.4, 201.3, 157.5, 150.8, 143.9, 139.1, 137.6, 136.1, 130.7, 129.2, 129.1, 128.0, 127.4, 127.3, 127.0, 116.3, 113.2, 56.5, 56.4, 41.2, 21.3, 20.8. IR (neat, cm<sup>-1</sup>): 2919, 1737, 1700, 1601, 1448, 1332, 1230, 995, 866, 790, 759, 696, 564, 468. HRMS (ESI): calcd. for C<sub>25</sub>H<sub>23</sub>O<sub>3</sub><sup>+</sup> [M + H]<sup>+</sup> 371.1642; found: 371.1642.

**(S)-2-(2-Fluorobenzyl)-4-methoxy-2-methyl-6-phenyl-1H-indene-1,3(2H)-dione**

**(3al).** 35.2 mg, overall 47% yield, white solid, m. p. 101 – 102 °C; 66% ee. The ee value was determined by HPLC [Daicel Chiralpak AD-H with hexane/*i*-PrOH (90:10) as the eluent, flow: 1.0 mL min<sup>-1</sup>,  $\lambda$  = 254 nm]: major diastereoisomer t (major) = 13.53, t (minor) = 18.84;  $[\alpha]_{\text{D}}^{20}$  = +26.0 (*c* 1, CHCl<sub>3</sub>); <sup>1</sup>H NMR (400 MHz, CDCl<sub>3</sub>)  $\delta$  7.64 (d, *J* = 1.2 Hz, 1H), 7.64 – 7.56 (m, 2H), 7.52 – 7.39 (m, 3H), 7.36 (d, *J* = 1.2 Hz, 1H), 7.13 – 7.02 (m, 2H), 6.95 – 6.82 (m, 2H), 4.05 (s, 3H), 3.15 (d, *J* = 1.6 Hz, 2H), 1.38 (s, 3H). <sup>13</sup>C NMR (101 MHz, CDCl<sub>3</sub>)  $\delta$  203.5, 200.6, 162.1, 159.7, 157.7, 151.0, 143.5, 139.1, 132.3, 132.2, 129.2, 129.1, 128.7 (d, *J*<sub>C-F</sub> = 8.0 Hz), 127.5, 127.0, 123.7 (d, *J*<sub>C-F</sub> = 4.0 Hz), 116.4, 115.3 (d, *J*<sub>C-F</sub> = 22.0 Hz), 113.4, 56.4, 55.2, 33.9, 33.9, 19.6. <sup>19</sup>F NMR (376 MHz, CDCl<sub>3</sub>)  $\delta$  -114.8 (Ar-F). IR (neat, cm<sup>-1</sup>): 1740, 1703, 1601, 1585, 1493, 1450, 1334, 1210, 1182, 1077, 1028, 997, 869, 756, 699. HRMS (ESI): calcd. for C<sub>24</sub>H<sub>19</sub>FO<sub>3</sub>Na<sup>+</sup> [M + Na]<sup>+</sup> 397.1210; found: 397.1208.

**(S)-2-(2-Chlorobenzyl)-4-methoxy-2-methyl-6-phenyl-1H-indene-1,3(2H)-dione**

**(3am).** 39.0 mg, overall 50% yield, white solid, m. p. 91 – 92 °C; 52% ee. The ee value was determined by HPLC [Daicel Chiralpak AD-H with hexane/*i*-PrOH (90:10) as the eluent, flow: 1.0 mL min<sup>-1</sup>,  $\lambda$  = 254 nm]: major diastereoisomer t (major) = 13.66, t (minor) = 16.34;  $[\alpha]_{\text{D}}^{20}$  = +38.2; <sup>1</sup>H NMR (400 MHz, CDCl<sub>3</sub>)  $\delta$  7.67 – 7.58 (m, 1H), 7.52 – 7.41 (m, 2H), 7.38 (d, *J* = 1.2 Hz, 3H), 7.25 – 7.19 (m, 1H), 7.18 – 7.12 (m, 1H), 7.09 – 7.01 (m, 1H), 4.06 (s, 3H), 3.28 (s, 2H), 1.38 (s, 3H). <sup>13</sup>C NMR (101 MHz, CDCl<sub>3</sub>)  $\delta$  203.3, 200.5, 157.7, 151.0, 143.6, 139.1, 134.8, 133.9, 132.0, 129.7, 129.2,

129.1, 128.2, 127.5, 127.0, 126.4, 116.4, 113.5, 56.4, 55.2, 37.9, 19.3. IR (neat,  $\text{cm}^{-1}$ ): 1740, 1704, 1603, 1572, 1450, 1332, 1209, 1079, 1052, 1036, 996, 864, 767, 751, 719, 701, 690. HRMS (ESI): calcd. for  $\text{C}_{24}\text{H}_{19}\text{ClO}_3\text{Na}^+$   $[\text{M} + \text{Na}]^+ 413.0915$ ; found: 413.0930.

**(S)-2-(2-Bromobenzyl)-4-methoxy-2-methyl-6-phenyl-1H-indene-1,3(2H)-dione (3an).** 45.1 mg, overall 52% yield, white solid, m. p. 130 – 131 °C; 46% ee. The ee value was determined by HPLC [Daicel Chiralpak AD-H with hexane/*i*-PrOH (90:10) as the eluent, flow: 1.0  $\text{mL min}^{-1}$ ,  $\lambda = 254 \text{ nm}$ ]: major diastereoisomer *t* (major) = 15.04, *t* (minor) = 17.46;  $[\alpha]_{\text{D}}^{20} = +44.4$  (*c* 1,  $\text{CHCl}_3$ );  $^1\text{H}$  NMR (400 MHz,  $\text{CDCl}_3$ )  $\delta$  7.66 (d,  $J = 1.2 \text{ Hz}$ , 1H), 7.65 – 7.56 (m, 2H), 7.54 – 7.40 (m, 4H), 7.38 (d,  $J = 1.2 \text{ Hz}$ , 1H), 7.16 (dd,  $J = 7.6, 2.0 \text{ Hz}$ , 1H), 7.09 (td,  $J = 7.6, 2.0 \text{ Hz}$ , 1H), 6.96 (td,  $J = 8.0, 2.0 \text{ Hz}$ , 1H), 4.07 (s, 3H), 3.31 (s, 2H), 1.38 (s, 3H).  $^{13}\text{C}$  NMR (101 MHz,  $\text{CDCl}_3$ )  $\delta$  203.2, 200.5, 157.8, 151.1, 143.6, 139.1, 135.8, 133.1, 131.7, 129.3, 129.2, 128.4, 127.5, 127.0, 126.9, 125.6, 116.4, 113.5, 56.4, 55.2, 40.3, 19.3. IR (neat,  $\text{cm}^{-1}$ ): 1738, 1701, 1603, 1567, 1469, 1451, 1335, 1232, 1024, 995, 874, 765, 755, 703, 658. HRMS (ESI): calcd. for  $\text{C}_{24}\text{H}_{19}\text{BrO}_3\text{Na}^+$   $[\text{M} + \text{Na}]^+ 457.0410$ ; found: 457.0416.

**(S)-4-Methoxy-2-methyl-2-(2-methylbenzyl)-6-phenyl-1H-indene-1,3(2H)-dione (3ao).** 31.1 mg, overall 42% yield, white solid, m. p. 79 – 80 °C; 85% ee. The ee value was determined by HPLC [Daicel Chiralpak AD-H with hexane/*i*-PrOH (90:10) as the eluent, flow: 1.0  $\text{mL min}^{-1}$ ,  $\lambda = 254 \text{ nm}$ ]: major diastereoisomer *t* (major) = 9.12, *t* (minor) = 11.83;  $[\alpha]_{\text{D}}^{20} = +52.0$  (*c* 1,  $\text{CHCl}_3$ );  $^1\text{H}$  NMR (400 MHz,  $\text{CDCl}_3$ )  $\delta$  7.64 – 7.54 (m, 3H), 7.52 – 7.39 (m, 3H), 7.32 (d,  $J = 1.2 \text{ Hz}$ , 1H), 7.03 – 6.94 (m, 2H), 6.92 (td,  $J = 7.2, 1.6 \text{ Hz}$ , 1H), 6.87 (td,  $J = 7.2, 1.6 \text{ Hz}$ , 1H), 4.03 (s, 3H), 3.20 (d,  $J = 2.4 \text{ Hz}$ , 2H), 2.32 (s, 3H), 1.40 (s, 3H).  $^{13}\text{C}$  NMR (101 MHz,  $\text{CDCl}_3$ )  $\delta$  204.5, 201.4, 157.5, 150.8, 143.9, 139.1, 136.8, 134.7, 130.6, 130.2, 129.2, 129.1, 127.5, 126.7, 125.5, 116.3, 113.2, 56.4, 56.3, 37.7, 20.7, 19.9. IR (neat,  $\text{cm}^{-1}$ ): 1739, 1704, 1601, 1449, 1323, 1206, 1074, 1050, 993, 865, 766, 746, 689, 565, 456. HRMS (ESI): calcd. for  $\text{C}_{25}\text{H}_{22}\text{O}_3\text{Na}^+$   $[\text{M} + \text{Na}]^+ 393.1461$ ; found: 393.1457.



**(S)-4-Methoxy-2-methyl-2-(naphthalen-2-ylmethyl)-6-phenyl-1H-indene-1,3(2H)-dione (3ap).** 56.0 mg, overall 69% yield, white solid, m. p. 120 – 121 °C; 91% ee. The ee value was determined by HPLC [Daicel Chiralpak AD-H with hexane/*i*-PrOH (90:10) as the eluent, flow: 1.0 mL min<sup>-1</sup>, λ = 254 nm]: major diastereoisomer t (major) = 15.44, t (minor) = 18.27; [α]<sub>D</sub><sup>20</sup> = -54.8 (c 1, CHCl<sub>3</sub>); <sup>1</sup>H NMR (400 MHz, CDCl<sub>3</sub>) δ 7.74 – 7.67 (m, 1H), 7.66 – 7.60 (m, 1H), 7.59 – 7.53 (m, 3H), 7.53 – 7.46 (m, 2H), 7.46 – 7.38 (m, 3H), 7.38 – 7.29 (m, 2H), 7.25 – 7.16 (m, 2H), 3.96 (s, 3H), 3.51 – 3.16 (m, 2H), 1.45 (s, 3H). <sup>13</sup>C NMR (101 MHz, CDCl<sub>3</sub>) δ 204.4, 201.2, 157.5, 150.9, 143.8, 139.1, 134.0, 133.2, 132.2, 129.1, 129.1, 128.8, 128.4, 127.9, 127.7, 127.5, 127.4, 127.3, 125.7, 125.5, 116.4, 113.3, 56.7, 56.3, 41.1, 21.3. IR (neat, cm<sup>-1</sup>): 1736, 1699, 1602, 1568, 1449, 1335, 1233, 1173, 997, 854, 815, 762, 744, 703. HRMS (ESI): calcd. for C<sub>28</sub>H<sub>22</sub>O<sub>3</sub>Na<sup>+</sup> [M + Na]<sup>+</sup> 429.1461; found: 429.1461.

**(S)-4-Methoxy-2-methyl-2-(naphthalen-1-ylmethyl)-6-phenyl-1H-indene-1,3(2H)-dione (3aq).** 43.9 mg, overall 54% yield, white solid, m. p. 56 – 57 °C; 85% ee. The ee value was determined by HPLC [Daicel Chiralpak AD-H with hexane/*i*-PrOH (90:10) as the eluent, flow: 1.0 mL min<sup>-1</sup>, λ = 254 nm]: major diastereoisomer t (major) = 12.14, t (minor) = 14.95; [α]<sub>D</sub><sup>20</sup> = +95.5 (c 1, CHCl<sub>3</sub>); <sup>1</sup>H NMR (400 MHz, CDCl<sub>3</sub>) δ 8.15 (d, *J* = 8.4 Hz, 1H), 7.62 (d, *J* = 8.0 Hz, 1H), 7.56 – 7.29 (m, 9H), 7.26 (d, *J* = 6.8 Hz, 1H), 7.23 – 7.11 (m, 2H), 3.90 (s, 3H), 3.64 (s, 2H), 1.48 (s, 3H). <sup>13</sup>C NMR (101 MHz, CDCl<sub>3</sub>) δ 204.4, 201.2, 157.3, 150.6, 143.7, 139.1, 133.7, 132.6, 132.0, 129.1, 128.7, 128.3, 127.5, 127.4, 125.8, 125.4, 125.0, 124.9, 116.2, 113.1, 56.6, 56.3, 37.7, 20.4. IR (neat, cm<sup>-1</sup>): 1737, 1700, 1601, 1570, 1450, 1333, 1231, 1213, 994, 868, 781, 759, 696. HRMS (ESI): calcd. for C<sub>28</sub>H<sub>22</sub>O<sub>3</sub>Na<sup>+</sup> [M + Na]<sup>+</sup> 429.1461; found: 429.1459.

**(S)-2-Benzyl-2-ethyl-4-methoxy-6-phenyl-1H-indene-1,3(2H)-dione (3ar).** 34.8 mg, overall 47% yield, white solid, m. p. 107 – 108 °C; 46% ee. The ee value was determined by HPLC [Daicel Chiralpak AD-H with hexane/*i*-PrOH (90:10) as the eluent, flow: 1.0 mL min<sup>-1</sup>, λ = 254 nm]: major diastereoisomer t (major) = 9.97, t (minor) = 12.46; [α]<sub>D</sub><sup>20</sup> = +14.4 (c 1, CHCl<sub>3</sub>); <sup>1</sup>H NMR (400 MHz, CDCl<sub>3</sub>) δ 7.67 – 7.53 (m, 3H), 7.52 – 7.35 (m, 3H), 7.28 (d, *J* = 1.6 Hz, 1H), 7.13 – 6.88 (m, 5H), 4.02 (s,

3H), 3.22 – 3.00 (m, 2H), 2.06 – 1.88 (m, 2H), 0.78 (t,  $J = 7.6$  Hz, 3H).  $^{13}\text{C}$  NMR (101 MHz,  $\text{CDCl}_3$ )  $\delta$  204.8, 201.5, 157.1, 150.7, 145.1, 139.1, 136.0, 130.0, 129.2, 129.1, 128.7, 128.1, 127.5, 126.5, 116.2, 112.8, 61.4, 56.4, 40.8, 29.1, 9.3. IR (neat,  $\text{cm}^{-1}$ ): 1738, 1701, 1602, 1584, 1452, 1330, 1230, 1206, 870, 763, 741, 699. HRMS (ESI): calcd. for  $\text{C}_{25}\text{H}_{22}\text{O}_3\text{Na}^+$   $[\text{M} + \text{Na}]^+$  393.1461; found: 393.1458.

**(S)-2-(4-Bromobenzyl)-2-ethyl-4-methoxy-6-phenyl-1H-indene-1,3(2H)-dione**

**(3as).** 45.7 mg, overall 51% yield, white solid, m. p. 129 – 130 °C; 44% ee. The ee value was determined by HPLC [Daicel Chiralpak IA-H with hexane/*i*-PrOH (90:10) as the eluent, flow: 1.0 mL  $\text{min}^{-1}$ ,  $\lambda = 254$  nm]: major diastereoisomer  $t$  (major) = 10.28,  $t$  (minor) = 8.81;  $[\alpha]_{\text{D}}^{20} = +5.2$  ( $c$  1,  $\text{CHCl}_3$ );  $^1\text{H}$  NMR (400 MHz,  $\text{CDCl}_3$ )  $\delta$  7.66 – 7.55 (m, 3H), 7.53 – 7.39 (m, 3H), 7.33 (s, 1H), 7.24 – 7.07 (m, 2H), 6.92 (d,  $J = 8.4$  Hz, 2H), 4.04 (s, 3H), 3.16 – 2.99 (m, 2H), 1.95 (qd,  $J = 7.6, 2.8$  Hz, 2H), 0.78 (t,  $J = 7.6$  Hz, 3H).  $^{13}\text{C}$  NMR (101 MHz,  $\text{CDCl}_3$ )  $\delta$  204.5, 201.1, 157.2, 151.0, 144.9, 139.0, 135.1, 131.8, 131.2, 129.2, 129.1, 128.5, 127.5, 120.7, 116.4, 112.9, 61.2, 56.4, 39.6, 29.4, 9.3. IR (neat,  $\text{cm}^{-1}$ ): 1734, 1698, 1602, 1583, 1407, 1333, 1233, 872, 803, 768, 696, 632. HRMS (ESI): calcd. for  $\text{C}_{25}\text{H}_{21}\text{BrO}_3\text{Na}^+$   $[\text{M} + \text{Na}]^+$  471.0566; found: 471.0565.

**(S)-2-Allyl-4-methoxy-2-methyl-6-phenyl-1H-indene-1,3(2H)-dione (3at).** 33.1 mg, overall 54% yield, white solid, m. p. 159 – 160 °C; 60% ee. The ee value was determined by HPLC [Daicel Chiralpak AD-H with hexane/*i*-PrOH (90:10) as the eluent, flow: 1.0 mL  $\text{min}^{-1}$ ,  $\lambda = 254$  nm]: major diastereoisomer  $t$  (major) = 10.49,  $t$  (minor) = 12.06;  $[\alpha]_{\text{D}}^{20} = -15.0$  ( $c$  1,  $\text{CHCl}_3$ );  $^1\text{H}$  NMR (400 MHz,  $\text{CDCl}_3$ )  $\delta$  7.71 (d,  $J = 1.6$  Hz, 1H), 7.68 – 7.61 (m, 2H), 7.56 – 7.39 (m, 4H), 5.57 (m, 1H), 5.13 – 4.86 (m, 2H), 4.09 (s, 3H), 2.54 (m, 2H), 1.28 (s, 3H).  $^{13}\text{C}$  NMR (101 MHz,  $\text{CDCl}_3$ )  $\delta$  204.3, 201.3, 157.8, 151.2, 143.7, 139.2, 132.0, 129.2, 129.1, 127.5, 127.1, 119.3, 116.5, 113.5, 56.4, 54.5, 39.6, 19.5. IR (neat,  $\text{cm}^{-1}$ ): 2358, 2151, 1948, 1740, 1702, 1601, 1333, 1233, 1004, 775, 702, 588. HRMS (ESI): calcd. for  $\text{C}_{20}\text{H}_{19}\text{O}_3^+$   $[\text{M} + \text{H}]^+$  307.1329; found: 307.1328.

**Methyl (S)-2-(4-methoxy-2-methyl-1,3-dioxo-6-phenyl-2,3-dihydro-1H-inden-2-yl) acetate (3au).** 40.6 mg, overall 60% yield, white solid, m. p. 151 – 152 °C; 57% ee.

The *ee* value was determined by HPLC [Daicel Chiralpak AD-H with hexane/*i*-PrOH (90:10) as the eluent, flow: 1.0 mL min<sup>-1</sup>,  $\lambda$  = 254 nm]: major diastereoisomer *t* (major) = 19.26, *t* (minor) = 23.32;  $[\alpha]_{\text{D}}^{20}$  = -18.0 (*c* 1, CHCl<sub>3</sub>); <sup>1</sup>H NMR (400 MHz, CDCl<sub>3</sub>)  $\delta$  7.75 (d, *J* = 1.2 Hz, 1H), 7.69 – 7.60 (m, 2H), 7.56 – 7.39 (m, 4H), 4.08 (s, 3H), 3.52 (s, 3H), 3.18 – 2.92 (m, 2H), 1.27 (s, 3H). <sup>13</sup>C NMR (101 MHz, CDCl<sub>3</sub>)  $\delta$  203.0, 200.2, 171.3, 157.9, 151.0, 143.4, 139.4, 129.2, 129.1, 127.5, 126.7, 116.4, 113.8, 56.3, 52.0, 51.8, 38.4, 21.1. IR (neat, cm<sup>-1</sup>): 2920, 2357, 2217, 2194, 2162, 2015, 1947, 1731, 1702, 1603, 1334, 1208, 796, 623. HRMS (ESI): calcd. for C<sub>20</sub>H<sub>19</sub>O<sub>5</sub><sup>+</sup> [*M* + *H*]<sup>+</sup> 339.1227; found: 339.1222.

**(*S*)-4-Methoxy-2-methyl-6-phenyl-2-(thiophen-2-ylmethyl)-1H-indene-1,3(2H)-dione (3av).** 41.3 mg, overall 57% yield, colorless oily liquid; 84% *ee*. The *ee* value was determined by HPLC [Daicel Chiralpak AD-H with hexane/*i*-PrOH (90:10) as the eluent, flow: 1.0 mL min<sup>-1</sup>,  $\lambda$  = 254 nm]: major diastereoisomer *t* (major) = 14.03, *t* (minor) = 18.26;  $[\alpha]_{\text{D}}^{20}$  = -6.5 (*c* 1, CHCl<sub>3</sub>); <sup>1</sup>H NMR (400 MHz, CDCl<sub>3</sub>)  $\delta$  7.68 – 7.55 (m, 3H), 7.52 – 7.40 (m, 3H), 7.35 (d, *J* = 1.2 Hz, 1H), 6.91 (dd, *J* = 4.8, 2.0 Hz, 1H), 6.70 (m, 2H), 4.05 (s, 3H), 3.48 – 3.30 (m, 2H), 1.37 (s, 3H). <sup>13</sup>C NMR (101 MHz, CDCl<sub>3</sub>)  $\delta$  204.1, 200.8, 157.7, 151.0, 144.0, 139.1, 137.6, 129.2, 129.1, 127.5, 127.4, 126.6, 124.3, 116.4, 113.4, 56.4, 56.3, 34.8, 20.7. IR (neat, cm<sup>-1</sup>): 2924, 1737, 1699, 1600, 1449, 1332, 1209, 1078, 996, 758, 693, 552. HRMS (ESI): calcd. for C<sub>22</sub>H<sub>19</sub>O<sub>3</sub>S<sup>+</sup> [*M* + *H*]<sup>+</sup> 363.1049 found: 363.1043.

**(*S*)-2-Benzyl-6-(4-fluorophenyl)-4-methoxy-2-methyl-1H-indene-1,3(2H)-dione (3ba).** 33.7 mg, overall 45% yield, white solid, m. p. 108 – 109 °C; 90% *ee*. The *ee* value was determined by HPLC [Daicel Chiralpak AD-H with hexane/*i*-PrOH (90:10) as the eluent, flow: 1.0 mL min<sup>-1</sup>,  $\lambda$  = 254 nm]: major diastereoisomer *t* (major) = 13.96, *t* (minor) = 18.04;  $[\alpha]_{\text{D}}^{20}$  = +14.4 (*c* 1, CHCl<sub>3</sub>); <sup>1</sup>H NMR (400 MHz, CDCl<sub>3</sub>)  $\delta$  7.62 – 7.43 (m, 3H), 7.23 (d, *J* = 1.6 Hz, 1H), 7.20 – 7.10 (m, 2H), 7.11 – 6.92 (m, 5H), 4.01 (s, 3H), 3.22 – 3.06 (m, 2H), 1.38 (s, 3H). <sup>13</sup>C NMR (101 MHz, CDCl<sub>3</sub>)  $\delta$  204.3, 201.2, 163.5 (d, *J*<sub>CF</sub> = 248.0 Hz), 157.5, 149.7, 143.9, 136.1, 135.3, 135.2, 129.9, 129.2 (d, *J*<sub>CF</sub> = 8.0 Hz), 128.1, 127.4, 126.6, 116.3, 116.1, 113.0, 56.5, 56.4, 41.2, 20.8. <sup>19</sup>F NMR

(564 MHz, CDCl<sub>3</sub>)  $\delta$  -112.2 (Ar-F). IR (neat, cm<sup>-1</sup>): 1732, 1700, 1599, 1573, 1516, 1332, 1242, 1210, 1161, 998, 832, 771, 748, 703. HRMS (ESI): calcd. for C<sub>24</sub>H<sub>19</sub>FO<sub>3</sub>Na<sup>+</sup> [M + Na]<sup>+</sup> 397.1210; found: 397.1211.

**(S)-2-Benzyl-6-(4-chlorophenyl)-4-methoxy-2-methyl-1H-indene-1,3(2H)-dione**

**(3ca)**. 46.8 mg, overall 60% yield, white solid, m. p. 91 – 92 °C; 89% ee. The ee value was determined by HPLC [Daicel Chiralpak AD-H with hexane/*i*-PrOH (90:10) as the eluent, flow: 1.0 mL min<sup>-1</sup>,  $\lambda$  = 254 nm]: major diastereoisomer t (major) = 15.77, t (minor) = 19.26; [ $\alpha$ ]<sub>D</sub><sup>20</sup> = -11.4 (*c* 1, CHCl<sub>3</sub>); <sup>1</sup>H NMR (400 MHz, CDCl<sub>3</sub>)  $\delta$  7.52 (d, *J* = 1.2 Hz, 1H), 7.51 – 7.47 (m, 2H), 7.45 – 7.39 (m, 2H), 7.24 (d, *J* = 1.2 Hz, 1H), 7.10 – 6.96 (m, 5H), 4.01 (s, 3H), 3.20 – 3.07 (m, 2H), 1.37 (s, 3H). <sup>13</sup>C NMR (101 MHz, CDCl<sub>3</sub>)  $\delta$  204.2, 201.1, 157.6, 149.5, 143.9, 137.5, 136.1, 135.5, 129.9, 129.4, 128.7, 128.1, 127.6, 126.6, 116.0, 113.0, 56.5, 56.4, 41.2, 20.8. IR (neat, cm<sup>-1</sup>): 1734, 1702, 1600, 1497, 1452, 1395, 1333, 1237, 1093, 998, 924, 825, 769, 749, 702, 556, 512, 489. HRMS (ESI): calcd. for C<sub>24</sub>H<sub>19</sub>ClO<sub>3</sub>Na<sup>+</sup> [M + Na]<sup>+</sup> 413.0915; found: 413.0915.

**(S)-2-Benzyl-6-(4-bromophenyl)-4-methoxy-2-methyl-1H-indene-1,3(2H)-dione**

**(3da)**. 42.5 mg, overall 49% yield, white solid, m. p. 57 – 58 °C; 89% ee. The ee value was determined by HPLC [Daicel Chiralpak AD-H with hexane/*i*-PrOH (90:10) as the eluent, flow: 1.0 mL min<sup>-1</sup>,  $\lambda$  = 254 nm]: major diastereoisomer t (major) = 16.80, t (minor) = 19.97; [ $\alpha$ ]<sub>D</sub><sup>20</sup> = -16.2 (*c* 1, CHCl<sub>3</sub>); <sup>1</sup>H NMR (400 MHz, CDCl<sub>3</sub>)  $\delta$  7.62 – 7.54 (m, 2H), 7.52 (d, *J* = 1.2 Hz, 1H), 7.46 – 7.37 (m, 2H), 7.23 (d, *J* = 1.6 Hz, 1H), 7.11 – 6.93 (m, 5H), 4.01 (s, 3H), 3.21 – 3.07 (m, 2H), 1.37 (s, 3H). <sup>13</sup>C NMR (101 MHz, CDCl<sub>3</sub>)  $\delta$  204.2, 201.1, 157.6, 149.5, 144.0, 138.0, 136.1, 132.3, 129.9, 129.0, 128.1, 127.6, 126.6, 123.7, 116.0, 113.0, 56.5, 56.4, 41.2, 20.8. IR (neat, cm<sup>-1</sup>): 1737, 1699, 1494, 1451, 1391, 1331, 1234, 1073, 998, 922, 821, 745, 699, 556, 510. HRMS (ESI): calcd. for C<sub>24</sub>H<sub>19</sub>BrO<sub>3</sub>Na<sup>+</sup> [M + Na]<sup>+</sup> 457.0410; found: 457.0417.

**(S)-2-Benzyl-6-(4-iodophenyl)-4-methoxy-2-methyl-1H-indene-1,3(2H)-dione**

**(3ea)**. 48.2 mg, overall 50% yield, white solid, m. p. 170 – 171 °C; 90% ee. The ee value was determined by HPLC [Daicel Chiralpak AD-H with hexane/*i*-PrOH (90:10) as the eluent, flow: 1.0 mL min<sup>-1</sup>,  $\lambda$  = 254 nm]: major diastereoisomer t (major) = 16.93,

t (minor) = 19.87;  $[\alpha]_{\text{D}}^{20} = -22.5$  (*c* 1, CHCl<sub>3</sub>); <sup>1</sup>H NMR (400 MHz, CDCl<sub>3</sub>) δ 7.84 – 7.72 (m, 2H), 7.52 (d, *J* = 1.2 Hz, 1H), 7.32 – 7.24 (m, 2H), 7.23 (d, *J* = 1.2 Hz, 1H), 7.11 – 6.93 (m, 5H), 4.00 (s, 3H), 3.20 – 3.05 (m, 2H), 1.37 (s, 3H). <sup>13</sup>C NMR (101 MHz, CDCl<sub>3</sub>) δ 204.2, 201.1, 157.6, 149.6, 144.0, 138.5, 138.3, 136.1, 129.9, 129.1, 128.1, 127.7, 126.7, 116.0, 113.0, 95.5, 56.5, 56.4, 41.2, 20.8. IR (neat, cm<sup>-1</sup>): 1699, 1601, 1333, 1244, 1003, 818, 701, 508, 422. HRMS (ESI): calcd. for C<sub>24</sub>H<sub>20</sub>IO<sub>3</sub><sup>+</sup> [*M* + *H*]<sup>+</sup> 483.0452; found: 483.0440.

**(*S*)-2-Benzyl-4-methoxy-2-methyl-6-(*p*-tolyl)-1H-indene-1,3(2H)-dione (3fa).** 36.3 mg, overall 49% yield, white solid, m. p. 121 – 122 °C; 89% ee. The ee value was determined by HPLC [Daicel Chiralpak AD-H with hexane/*i*-PrOH (90:10) as the eluent, flow: 1.0 mL min<sup>-1</sup>, λ = 254 nm]: major diastereoisomer t (major) = 10.55, t (minor) = 14.51;  $[\alpha]_{\text{D}}^{20} = -2.7$  (*c* 1, CHCl<sub>3</sub>); <sup>1</sup>H NMR (400 MHz, CDCl<sub>3</sub>) δ 7.56 (d, *J* = 1.6 Hz, 1H), 7.53 – 7.40 (m, 2H), 7.34 – 7.25 (m, 2H), 7.25 (d, *J* = 3.2 Hz, 1H), 7.16 – 6.84 (m, 5H), 4.01 (s, 3H), 3.32 – 2.96 (m, 2H), 2.40 (s, 3H), 1.38 (s, 3H). <sup>13</sup>C NMR (101 MHz, CDCl<sub>3</sub>) δ 204.5, 201.2, 157.5, 150.8, 143.8, 139.4, 136.2, 136.1, 129.9, 129.9, 128.1, 127.3, 127.1, 126.6, 116.0, 113.0, 56.5, 56.3, 41.1, 21.2, 20.9. IR (neat, cm<sup>-1</sup>): 2365, 1733, 1699, 1598, 1451, 1332, 1241, 1205, 999, 817, 746, 700, 553, 491. HRMS (ESI): calcd. for C<sub>25</sub>H<sub>22</sub>O<sub>3</sub>Na<sup>+</sup> [*M* + Na]<sup>+</sup> 393.1461; found: 393.1456.

**(*S*)-2-Benzyl-4-methoxy-2-methyl-6-(3-nitrophenyl)-1H-indene-1,3(2H)-dione (3ga).** 40.9 mg, overall 51% yield, white solid, m. p. 58 – 59 °C; 92% ee. The ee value was determined by HPLC [Daicel Chiralpak IG-H with hexane/*i*-PrOH (90:10) as the eluent, flow: 1.0 mL min<sup>-1</sup>, λ = 254 nm]: major diastereoisomer t (major) = 40.59, t (minor) = 64.39;  $[\alpha]_{\text{D}}^{20} = +35.0$  (*c* 1, CHCl<sub>3</sub>); <sup>1</sup>H NMR (400 MHz, CDCl<sub>3</sub>) δ 8.43 (t, *J* = 2.0 Hz, 1H), 8.29 (dd, *J* = 8.0, 2.0 Hz, 1H), 7.91 (dd, *J* = 8.0, 1.6 Hz, 1H), 7.67 (t, *J* = 8.0 Hz, 1H), 7.60 (d, *J* = 1.2 Hz, 1H), 7.31 (d, *J* = 1.6 Hz, 1H), 7.17 – 6.87 (m, 5H), 4.07 (s, 3H), 3.25 – 3.08 (m, 2H), 1.40 (s, 3H). <sup>13</sup>C NMR (101 MHz, CDCl<sub>3</sub>) δ 204.0, 201.1, 157.8, 148.8, 147.9, 144.1, 140.8, 136.0, 133.3, 130.3, 129.9, 128.3, 128.2, 126.7, 123.7, 122.3, 116.3, 113.3, 56.6, 56.6, 41.3, 20.7. IR (neat, cm<sup>-1</sup>): 2359, 1738, 1702,

1602, 1527, 1450, 1331, 1235, 998, 808, 737, 698, 555, 507. HRMS (ESI): calcd. for  $C_{24}H_{19}NO_5Na^+$   $[M + Na]^+$  424.1155; found: 424.1155.

**(S)-2-Benzyl-6-(2-fluorophenyl)-4-methoxy-2-methyl-1H-indene-1,3(2H)-dione**

**(3ha).** 33.7 mg, overall 45% yield, colorless oily liquid; 89% ee. The ee value was determined by HPLC [Daicel Chiralpak AD-H with hexane/*i*-PrOH (90:10) as the eluent, flow: 1.0 mL min<sup>-1</sup>,  $\lambda$  = 254 nm]: major diastereoisomer t (major) = 10.18, t (minor) = 13.43;  $[\alpha]_D^{20}$  = +10.0 (*c* 1, CHCl<sub>3</sub>); <sup>1</sup>H NMR (400 MHz, CDCl<sub>3</sub>)  $\delta$  7.53 (s, 1H), 7.47 – 7.35 (m, 2H), 7.31 (s, 1H), 7.26 – 7.13 (m, 2H), 7.13 – 6.91 (m, 5H), 4.00 (s, 3H), 3.26 – 3.01 (m, 2H), 1.39 (s, 3H). <sup>13</sup>C NMR (101 MHz, CDCl<sub>3</sub>)  $\delta$  204.1, 201.2, 157.1, 145.3, 143.5, 136.1, 130.8 (d,  $J_{C-F}$  = 8.0 Hz), 130.6, 130.5, 130.0, 128.1, 127.6, 126.6, 124.7 (d,  $J_{C-F}$  = 4.0 Hz), 118.4, 118.3, 116.5 (d,  $J_{C-F}$  = 22.0 Hz), 115.2, 56.4, 56.3, 41.2, 20.8. <sup>19</sup>F NMR (564 MHz, CDCl<sub>3</sub>)  $\delta$  -116.9 (Ar-F). IR (neat, cm<sup>-1</sup>): 2921, 1738, 1701, 1602, 1496, 1450, 1334, 1232, 1078, 998, 874, 801, 757, 699, 556, 505. HRMS (ESI): calcd. for  $C_{24}H_{19}FO_3Na^+$   $[M + Na]^+$  397.1210; found: 397.1202.0

**(S)-2-Benzyl-4-methoxy-2-methyl-6-(o-tolyl)-1H-indene-1,3(2H)-dione (3ia).**

27.4 mg, overall 37% yield, colorless oily liquid; 89% ee. The ee value was determined by HPLC [Daicel Chiralpak AD-H with hexane/*i*-PrOH (90:10) as the eluent, flow: 1.0 mL min<sup>-1</sup>,  $\lambda$  = 254 nm]: major diastereoisomer t (major) = 7.78, t (minor) = 10.01;  $[\alpha]_D^{20}$  = +60.0 (*c* 1, CHCl<sub>3</sub>); <sup>1</sup>H NMR (400 MHz, CDCl<sub>3</sub>)  $\delta$  7.35 – 7.24 (m, 3H), 7.24 (dd,  $J$  = 7.2, 2.0 Hz, 1H), 7.15 (dd,  $J$  = 7.6, 1.2 Hz, 1H), 7.11 – 6.95 (m, 6H), 3.95 (s, 3H), 3.28 – 3.03 (m, 2H), 2.19 (s, 3H), 1.39 (s, 3H). <sup>13</sup>C NMR (101 MHz, CDCl<sub>3</sub>)  $\delta$  204.4, 201.3, 156.9, 151.9, 143.3, 139.9, 136.1, 135.0, 130.7, 129.9, 129.2, 128.6, 128.1, 127.3, 126.6, 126.1, 118.6, 115.4, 56.4, 56.3, 41.6, 20.4, 20.3. IR (neat, cm<sup>-1</sup>): 2925, 1738, 1701, 1600, 1452, 1331, 1229, 1081, 998, 872, 759, 699, 557, 504. HRMS (ESI): calcd. for  $C_{25}H_{22}O_3Na^+$   $[M + Na]^+$  393.1461; found: 393.1459.

**(S)-2-Benzyl-4-methoxy-2-methyl-6-(naphthalen-2-yl)-1H-indene-1,3(2H)-dione**

**(3ja).** 49.6 mg, overall 61% yield, white solid, m. p. 132 – 133 °C; 89% ee. The ee value was determined by HPLC [Daicel Chiralpak AD-H with hexane/*i*-PrOH (90:10) as the eluent, flow: 1.0 mL min<sup>-1</sup>,  $\lambda$  = 254 nm]: major diastereoisomer t (major) = 15.02, t

(minor) = 19.65;  $[\alpha]_{\text{D}}^{20} = +28.7$  (*c* 1, CHCl<sub>3</sub>); <sup>1</sup>H NMR (400 MHz, CDCl<sub>3</sub>) δ 8.03 (d, *J* = 2.0 Hz, 1H), 7.95 – 7.82 (m, 3H), 7.70 (d, *J* = 1.6 Hz, 1H), 7.66 (dd, *J* = 8.4, 2.0 Hz, 1H), 7.58 – 7.48 (m, 2H), 7.41 (d, *J* = 1.6 Hz, 1H), 7.16 – 6.96 (m, 5H), 4.05 (s, 3H), 3.27 – 3.05 (m, 2H), 1.41 (s, 3H). <sup>13</sup>C NMR (101 MHz, CDCl<sub>3</sub>) δ 204.5, 201.3, 157.6, 150.8, 143.9, 136.3, 136.2, 133.4, 130.0, 129.0, 128.5, 128.2, 127.8, 127.4, 127.1, 127.0, 126.9, 126.7, 124.9, 116.4, 113.5, 56.6, 56.4, 41.2, 20.9. IR (neat, cm<sup>-1</sup>): 1735, 1698, 1602, 1571, 1448, 1332, 1315, 1247, 1176, 1003, 879, 857, 820, 745, 698, 563, 553, 505, 476, 447, 408. HRMS (ESI): calcd. for C<sub>28</sub>H<sub>22</sub>O<sub>3</sub>Na<sup>+</sup> [M + Na]<sup>+</sup> 429.1461; found: 429.1441.

**(S)-2-Benzyl-6-(furan-2-yl)-4-methoxy-2-methyl-1H-indene-1,3(2H)-dione (3ka).**

34.6 mg, overall 50% yield, white solid, m. p. 82 – 83 °C; 84% ee. The ee value was determined by HPLC [Daicel Chiralpak AD-H with hexane/*i*-PrOH (90:10) as the eluent, flow: 1.0 mL min<sup>-1</sup>, λ = 254 nm]: major diastereoisomer t (major) = 12.20, t (minor) = 13.54;  $[\alpha]_{\text{D}}^{20} = +20.0$  (*c* 1, CHCl<sub>3</sub>); <sup>1</sup>H NMR (400 MHz, CDCl<sub>3</sub>) δ 7.59 (d, *J* = 1.2 Hz, 1H), 7.52 (d, *J* = 1.6 Hz, 1H), 7.40 (d, *J* = 1.2 Hz, 1H), 7.09 – 6.94 (m, 5H), 6.86 (dd, *J* = 3.6, 0.8 Hz, 1H), 6.52 (dd, *J* = 3.6, 2.0 Hz, 1H), 4.01 (s, 3H), 3.20 – 3.05 (m, 2H), 1.36 (s, 3H). <sup>13</sup>C NMR (101 MHz, CDCl<sub>3</sub>) δ 204.4, 200.9, 157.8, 151.8, 144.1, 143.9, 139.2, 136.1, 129.8, 128.1, 127.0, 126.6, 112.5, 111.9, 109.6, 109.5, 56.4, 56.3, 41.3, 20.7. IR (neat, cm<sup>-1</sup>): 1735, 1697, 1603, 1450, 1328, 1240, 1179, 1056, 1023, 1004, 864, 810, 747, 704, 593, 561, 511. HRMS (ESI): calcd. for C<sub>22</sub>H<sub>18</sub>O<sub>4</sub>Na<sup>+</sup> [M + Na]<sup>+</sup> 369.1097; found: 369.1097.

**(S)-2-Benzyl-4-methoxy-2-methyl-6-(thiophen-2-yl)-1H-indene-1,3(2H)-dione (3la).**

37.7 mg, overall 52% yield, white solid, m. p. 113 – 114 °C; 86% ee. The ee value was determined by HPLC [Daicel Chiralpak AD-H with hexane/*i*-PrOH (90:10) as the eluent, flow: 1.0 mL min<sup>-1</sup>, λ = 254 nm]: major diastereoisomer t (major) = 12.16, t (minor) = 14.59;  $[\alpha]_{\text{D}}^{20} = -14.0$  (*c* 1, CHCl<sub>3</sub>); <sup>1</sup>H NMR (400 MHz, CDCl<sub>3</sub>) δ 7.58 (d, *J* = 1.2 Hz, 1H), 7.44 (dd, *J* = 3.6, 1.2 Hz, 1H), 7.40 (dd, *J* = 5.2, 1.2 Hz, 1H), 7.27 (d, *J* = 1.2 Hz, 1H), 7.15 – 6.95 (m, 6H), 4.01 (s, 3H), 3.22 – 3.04 (m, 2H), 1.37 (s, 3H). <sup>13</sup>C NMR (101 MHz, CDCl<sub>3</sub>) δ 204.3, 200.8, 157.7, 144.0, 143.4, 141.9, 136.1, 129.9, 128.6,

128.1, 127.8, 127.3, 126.7, 126.0, 114.3, 111.5, 56.5, 56.4, 41.2, 20.8. IR (neat,  $\text{cm}^{-1}$ ): 1734, 1697, 1601, 1570, 1451, 1412, 1374, 1311, 1240, 1179, 1076, 1031, 993, 856, 834, 749, 701, 558, 507. HRMS (ESI): calcd. for  $\text{C}_{22}\text{H}_{18}\text{O}_3\text{SNa}^+ [\text{M} + \text{Na}]^+ 385.0869$ ; found: 385.0868.

**(2S)-2-Benzyl-4-methoxy-2-methyl-6-phenyl-2,3-dihydro-1H-indene-1,3-diol (4).**

24.0 mg, 67% yield, white solid, m. p. 87 – 88 °C; >20:1 dr, 91% ee. The *dr* and *ee* value were determined by HPLC [Daicel Chiralpak IA-H with hexane/*i*-PrOH (75:25) as the eluent, flow: 1.0 mL  $\text{min}^{-1}$ ,  $\lambda = 254 \text{ nm}$ ]: *t* (major) = 19.27, *t* (minor) = +8.21;  $[\alpha]_{\text{D}}^{20} = 51.4$  (*c* 1,  $\text{CHCl}_3$ );  $^1\text{H}$  NMR (400 MHz,  $\text{CDCl}_3$ )  $\delta$  7.64 – 7.54 (m, 2H), 7.53 – 7.46 (m, 2H), 7.49 – 7.40 (m, 2H), 7.41 – 7.27 (m, 4H), 7.28 – 7.20 (m, 1H), 7.03 (d, *J* = 1.2 Hz, 1H), 4.74 (s, 1H), 4.47 (s, 1H), 3.93 (s, 3H), 3.25 – 3.06 (m, 2H), 2.40 (s, 2H), 0.70 (s, 3H).  $^{13}\text{C}$  NMR (101 MHz,  $\text{CDCl}_3$ )  $\delta$  156.8, 147.9, 144.7, 141.2, 139.2, 131.5, 130.7, 128.8, 128.1, 127.6, 127.3, 125.9, 117.1, 110.0, 82.3, 78.2, 55.4, 50.7, 36.6, 22.7. IR (neat,  $\text{cm}^{-1}$ ): 3551, 1592, 1574, 1461, 1399, 1329, 1195, 1164, 1036, 1023, 853, 806, 762, 749, 705, 693. HRMS (ESI): calcd. for  $\text{C}_{24}\text{H}_{24}\text{O}_3\text{Na}^+ [\text{M} + \text{Na}]^+ 383.1618$ ; found: 383.1598.

**(S)-2-(3-hydroxypropyl)-4-methoxy-2-methyl-6-phenyl-1H-indene-1,3(2H)-dione (5).**

53.8 mg, 83% yield, colorless oily liquid; 60% ee. The *ee* value was determined by HPLC [Daicel Chiralpak AS-H with hexane/*i*-PrOH (85:15) as the eluent, flow: 1.0 mL  $\text{min}^{-1}$ ,  $\lambda = 254 \text{ nm}$ ]: *t* (major) = 20.02, *t* (minor) = 16.95;  $[\alpha]_{\text{D}}^{20} = -6.0$  (*c* 1,  $\text{CHCl}_3$ );  $^1\text{H}$  NMR (400 MHz,  $\text{CDCl}_3$ )  $\delta$  7.74 – 7.68 (m, 1H), 7.68 – 7.60 (m, 2H), 7.48 (m, 3H), 7.43 (m, 1H), 4.08 (m, 3H), 3.50 (m, 2H), 1.88 (m, 2H), 1.40 (m, 2H), 1.27 (m, 3H), 1.24 (s, 1H).  $^{13}\text{C}$  NMR (101 MHz,  $\text{CDCl}_3$ )  $\delta$  205.0, 202.0, 157.8, 151.4, 143.6, 139.1, 129.3, 129.2, 127.5, 127.0, 116.6, 113.5, 62.6, 56.4, 54.2, 31.6, 28.2, 20.1. IR (neat,  $\text{cm}^{-1}$ ): 2923, 1737, 1695, 1602, 1449, 1332, 1214, 1057, 989, 868, 757, 693, 561. HRMS (ESI): calcd. for  $\text{C}_{20}\text{H}_{21}\text{O}_4^+ [\text{M} + \text{H}]^+ 325.1434$ ; found: 325.1430.

**(S)-2-([1,1'-biphenyl]-4-ylmethyl)-4-methoxy-2-methyl-6-phenyl-1H-indene-1,3(2H)-dione (6).**

71.6 mg, 92% yield, colorless oily liquid; 87% ee. The *ee* value were determined by HPLC [Daicel Chiralpak IA-H with hexane/*i*-PrOH (90:10) as the



eluent, flow: 1.0 mL min<sup>-1</sup>,  $\lambda$  = 254 nm]: t (major) = 12.41, t (minor) = 13.75;  $[\alpha]_{\text{D}}^{20}$  = -60.0 (*c* 1, CHCl<sub>3</sub>); <sup>1</sup>H NMR (400 MHz, CDCl<sub>3</sub>)  $\delta$  7.61 (d, *J* = 1.2 Hz, 1H), 7.59 – 7.54 (m, 2H), 7.50 – 7.39 (m, 5H), 7.38 – 7.28 (m, 5H), 7.26 (m, 1H), 7.14 (d, *J* = 8.0 Hz, 2H), 4.02 (s, 3H), 3.31 – 3.09 (m, 2H), 1.42 (s, 3H). <sup>13</sup>C NMR (101 MHz, CDCl<sub>3</sub>)  $\delta$  204.4, 201.3, 157.6, 151.0, 143.8, 140.6, 139.2, 139.1, 135.4, 130.4, 129.2, 129.1, 128.7, 127.5, 127.3, 127.1, 126.8, 126.7, 116.4, 113.3, 56.6, 56.4, 40.7, 21.0. IR (neat, cm<sup>-1</sup>): 2359, 2182, 2149, 1702, 1601, 1332, 999, 760, 513, 466. HRMS (ESI): calcd. for C<sub>30</sub>H<sub>25</sub>O<sub>3</sub><sup>+</sup> [M + H]<sup>+</sup> 433.1798; found: 433.1798.

**(S)-2-benzyl-4-methoxy-2-methyl-6-(4-(pyridin-4-yl)phenyl)-1H-indene-1,3(2H)-dione (7).** 74.1 mg, 95% yield, white solid, m. p. 59 – 60 °C; 87% ee. The *ee* value was determined by HPLC [Daicel Chiralpak AD-H with hexane/*i*-PrOH (80:20) as the eluent, flow: 1.0 mL min<sup>-1</sup>,  $\lambda$  = 254 nm]: t (major) = 22.52, t (minor) = 34.77;  $[\alpha]_{\text{D}}^{20}$  = -3.8 (*c* 1, CHCl<sub>3</sub>); <sup>1</sup>H NMR (400 MHz, CDCl<sub>3</sub>)  $\delta$  8.75 – 8.60 (m, 2H), 7.70 (m, 4H), 7.60 (d, *J* = 1.6 Hz, 1H), 7.55 – 7.46 (m, 2H), 7.32 (d, *J* = 1.2 Hz, 1H), 7.11 – 6.93 (m, 5H), 4.02 (s, 3H), 3.27 – 2.99 (m, 2H), 1.37 (s, 3H). <sup>13</sup>C NMR (101 MHz, CDCl<sub>3</sub>)  $\delta$  204.3, 201.1, 157.6, 150.4, 149.7, 147.2, 143.9, 139.7, 138.9, 136.1, 129.9, 128.2, 128.1, 127.7, 127.6, 126.6, 121.5, 116.2, 113.2, 56.5, 56.4, 41.2, 20.8. IR (neat, cm<sup>-1</sup>): 2225, 2149, 2093, 1983, 1700, 1598, 1333, 1233, 1002, 812, 700. HRMS (ESI): calcd. for C<sub>29</sub>H<sub>24</sub>NO<sub>3</sub><sup>+</sup> [M + H]<sup>+</sup> 434.1751; found: 434.1766.

## VI: NMR spectra of new compounds

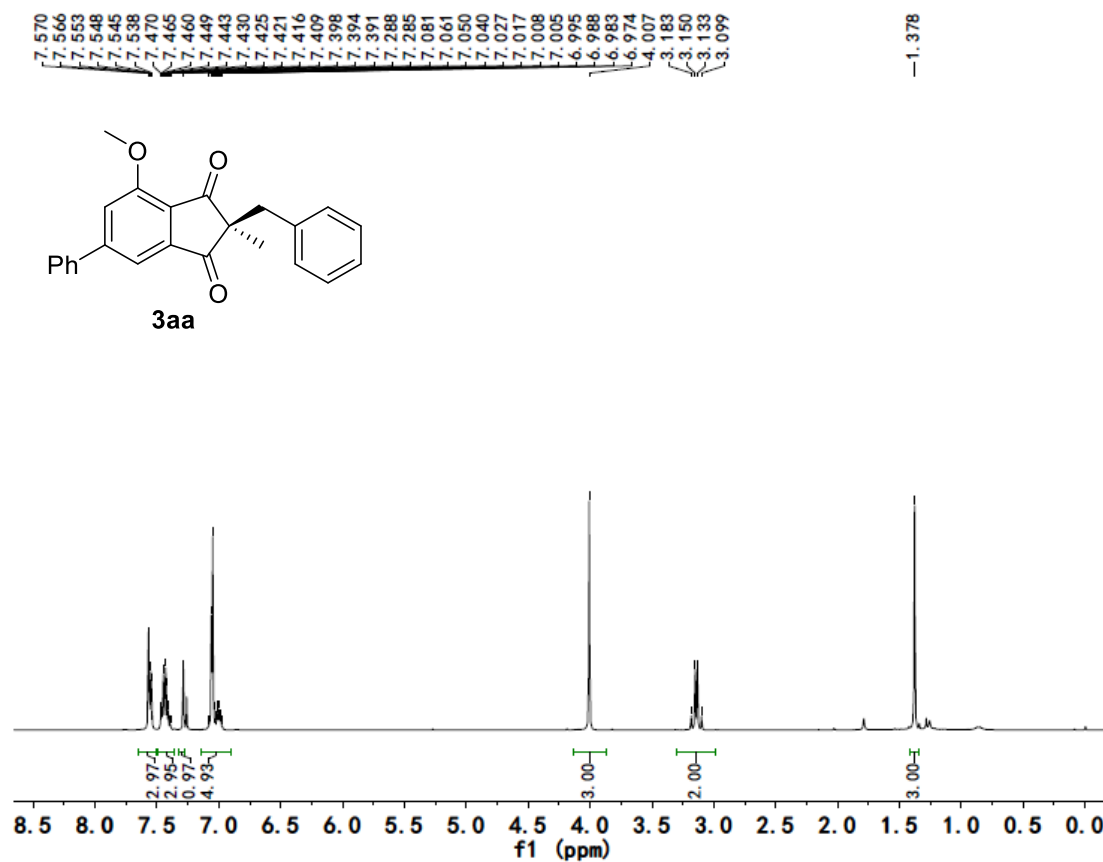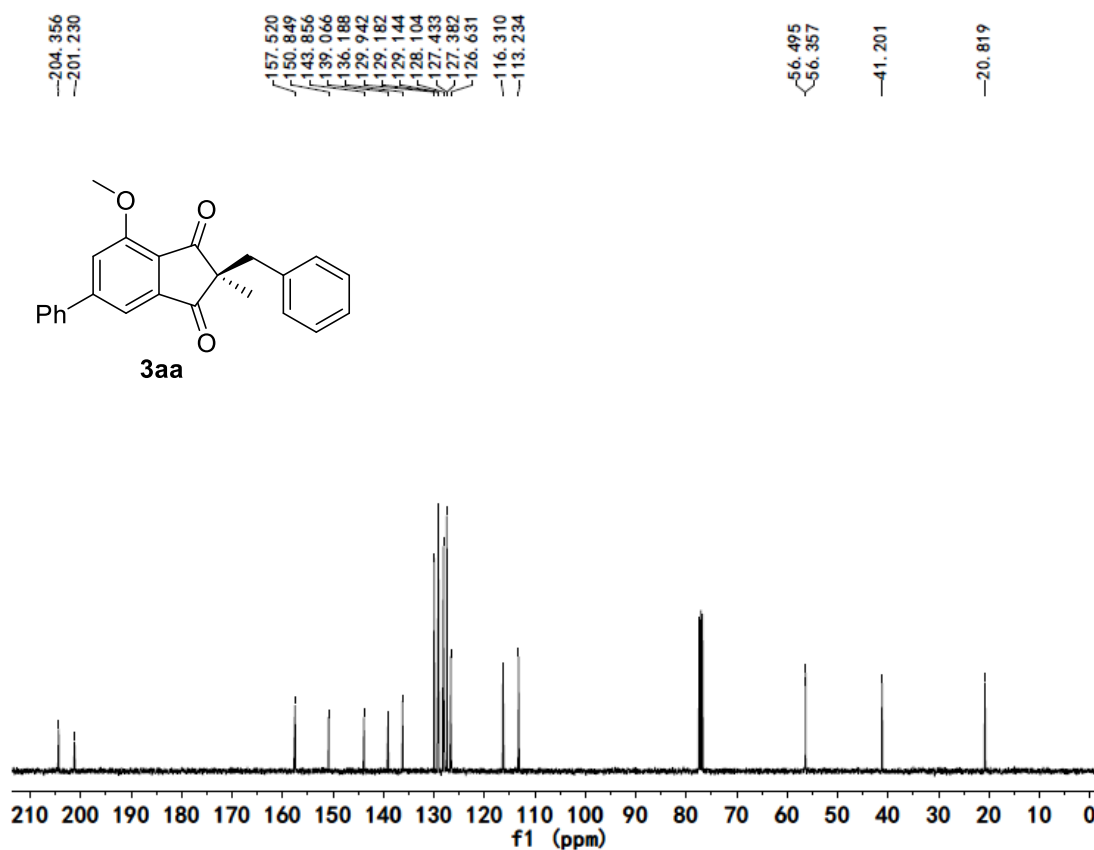

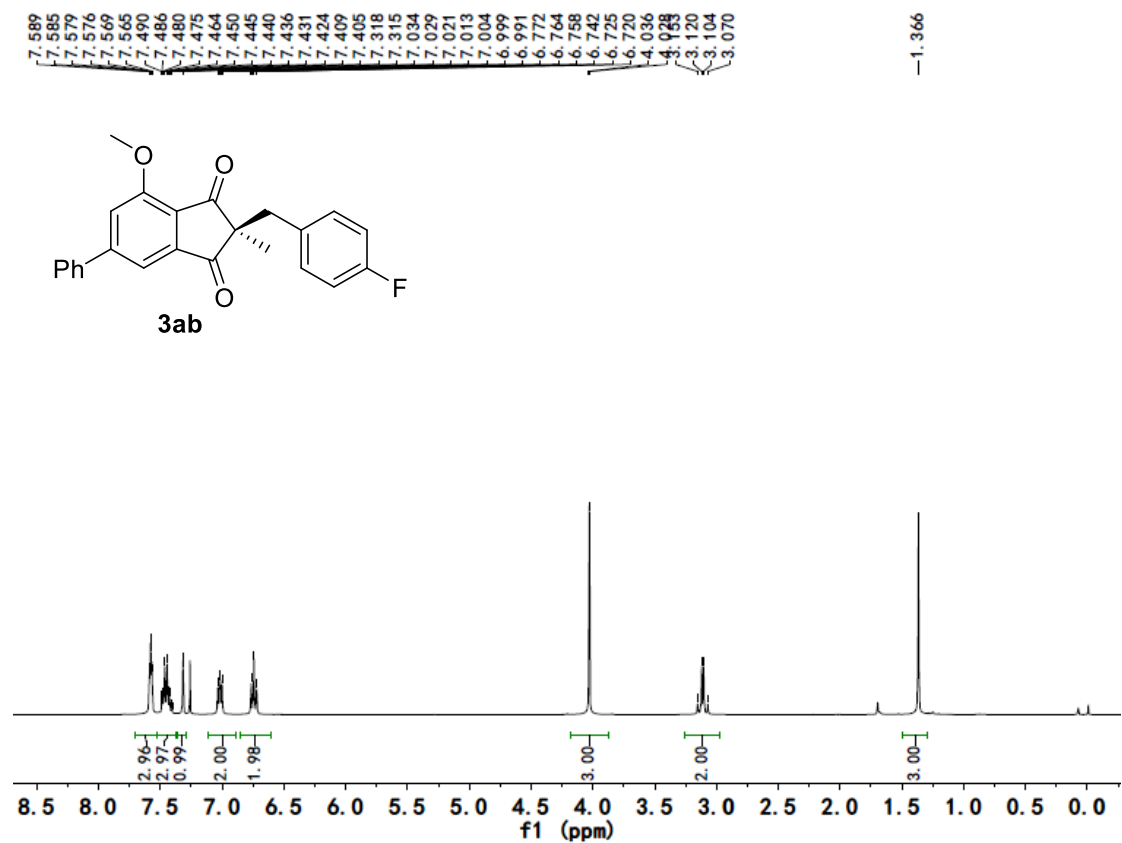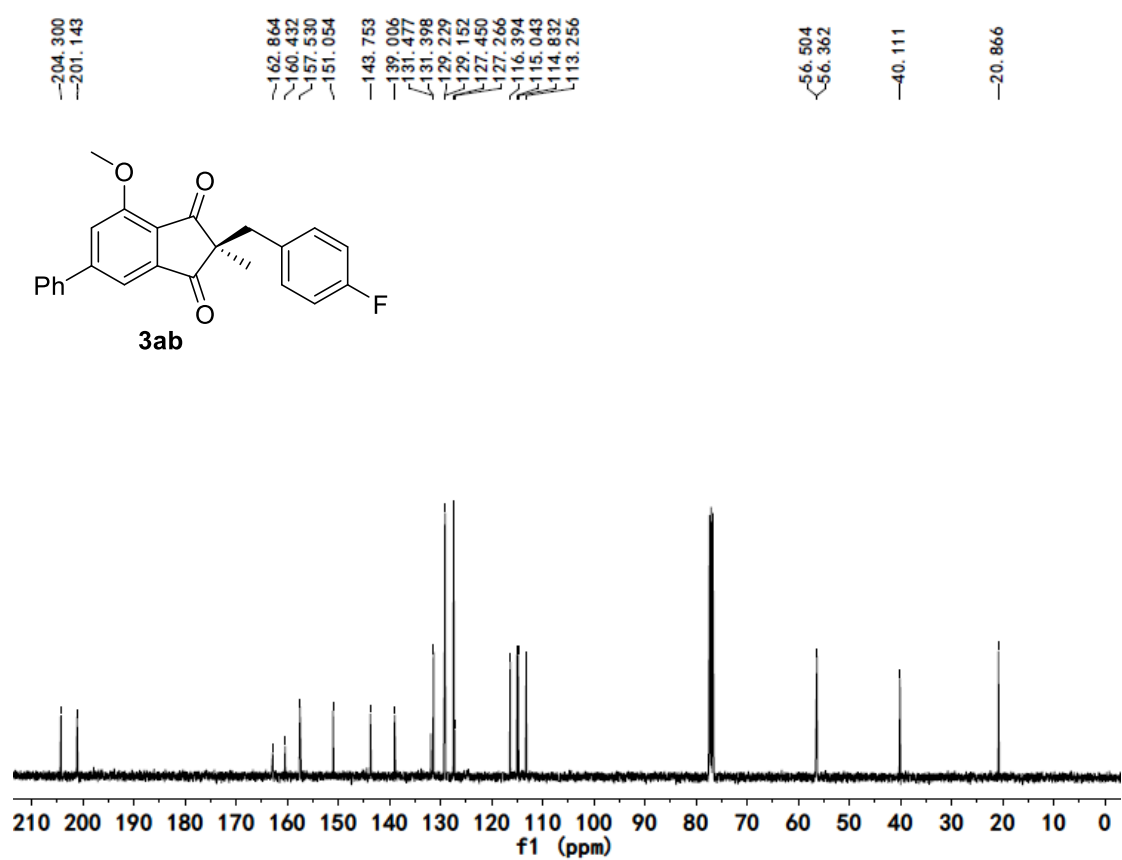

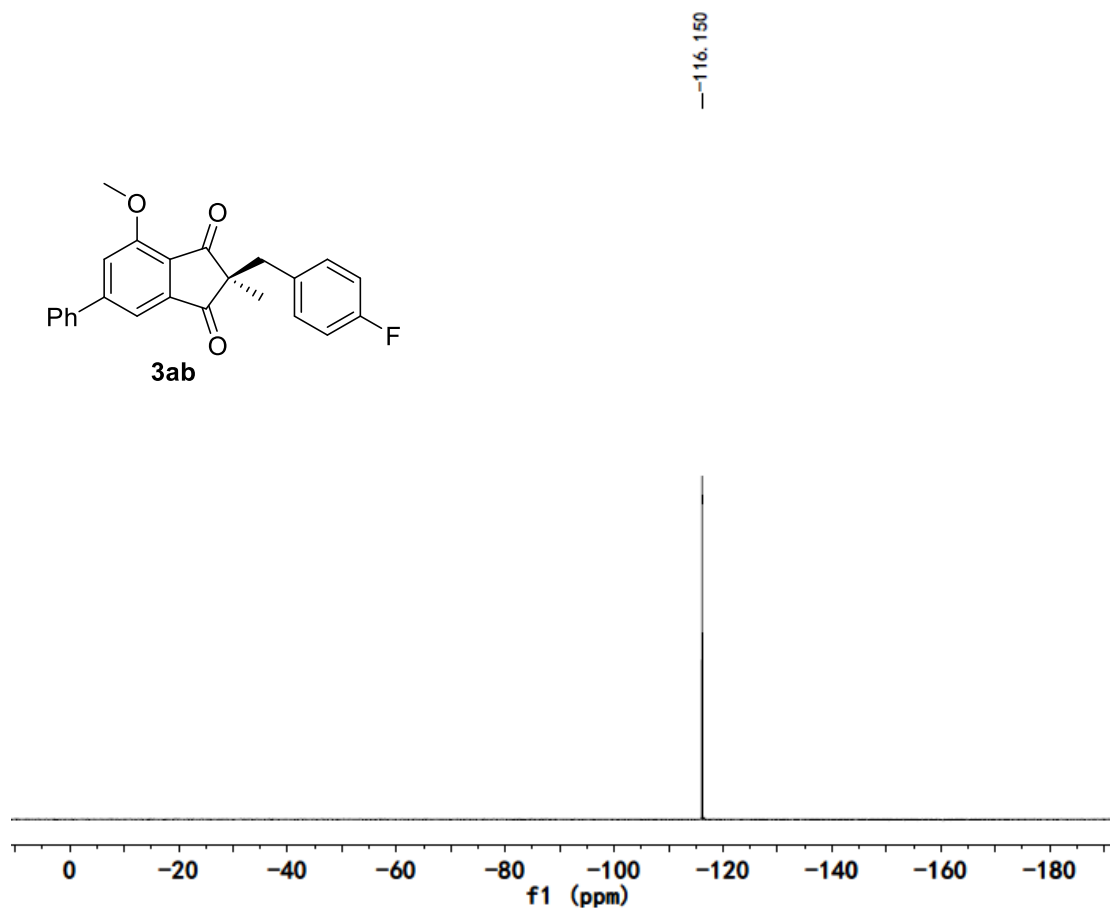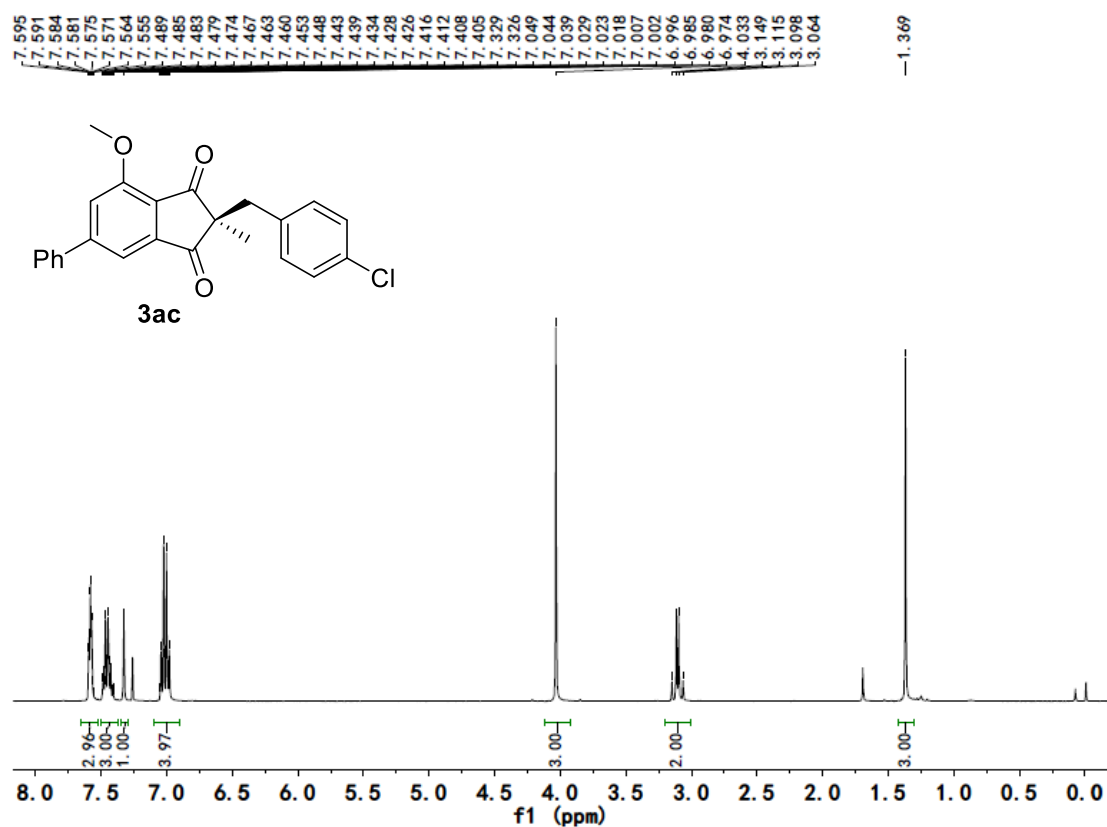

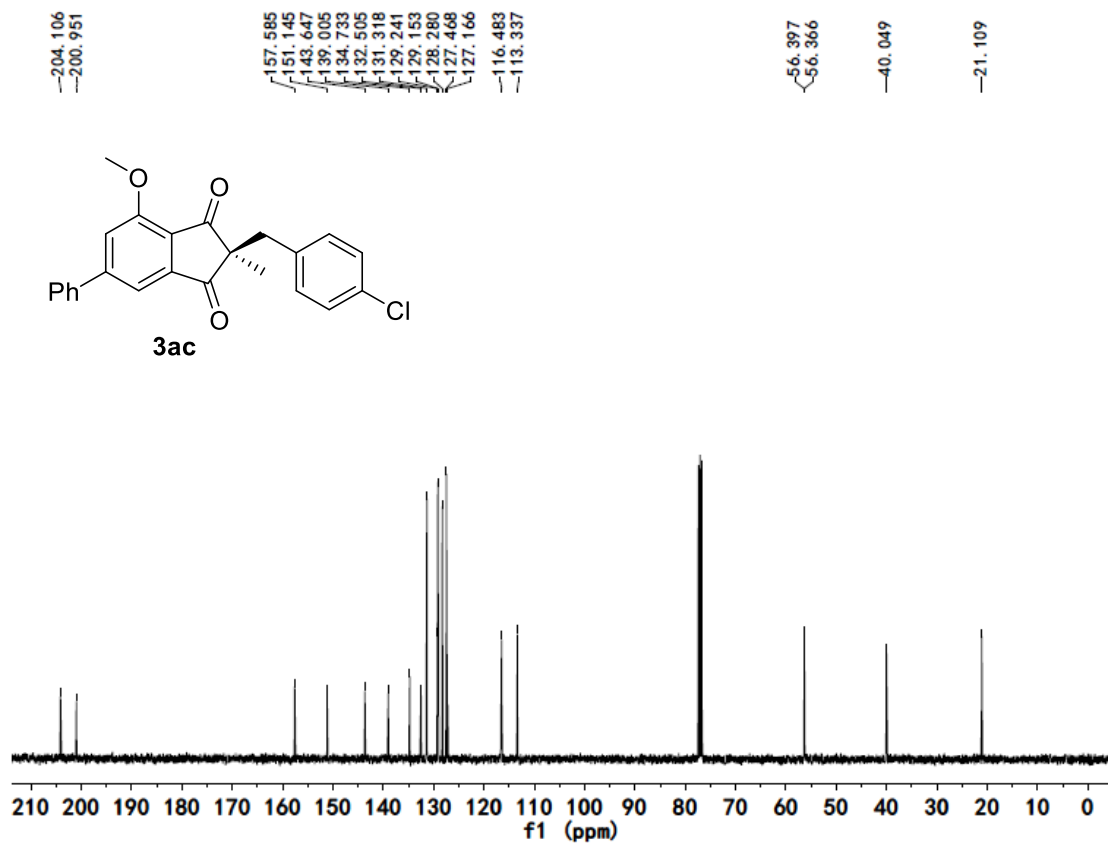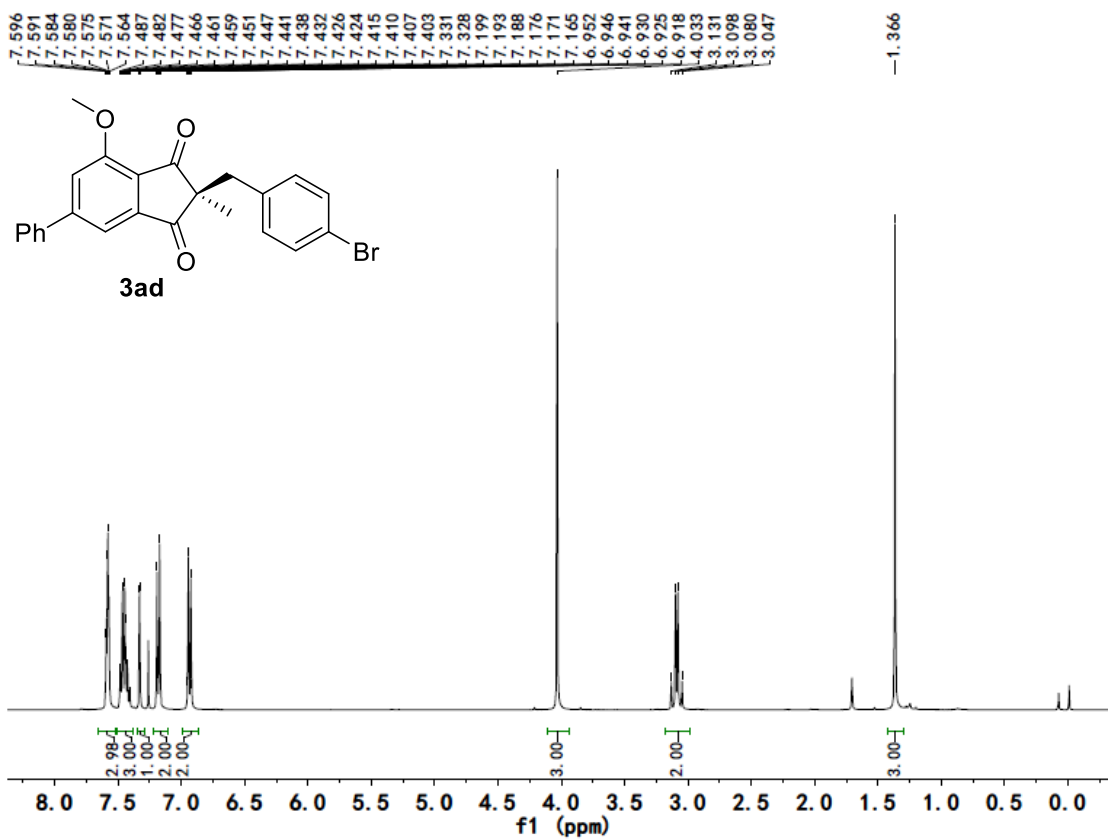

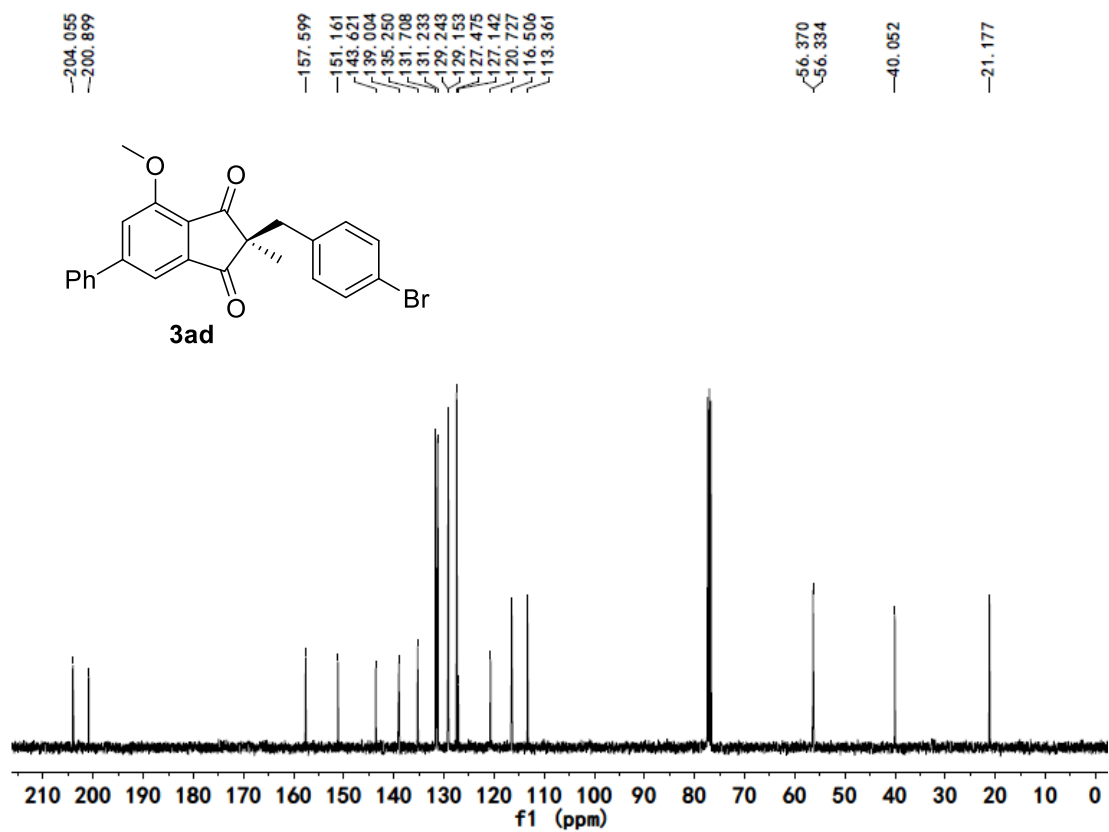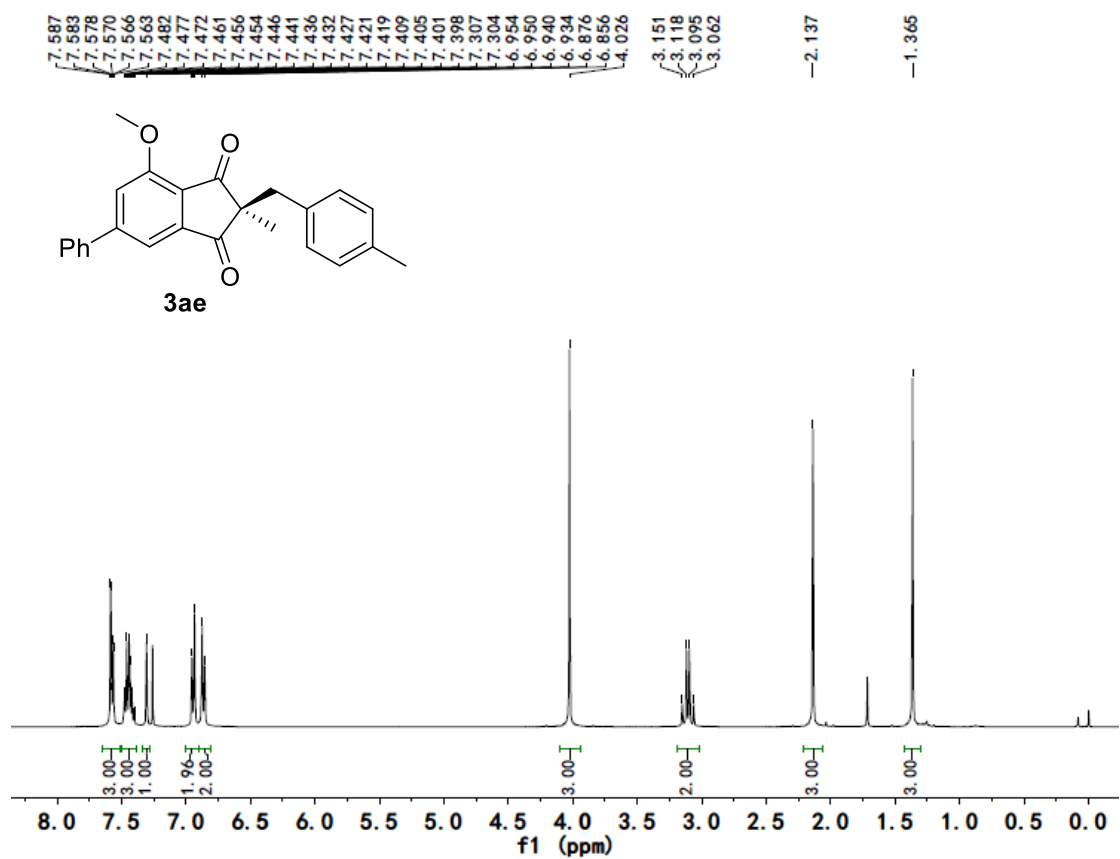

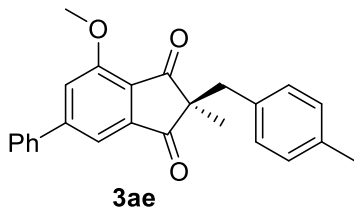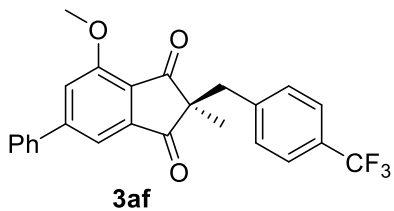

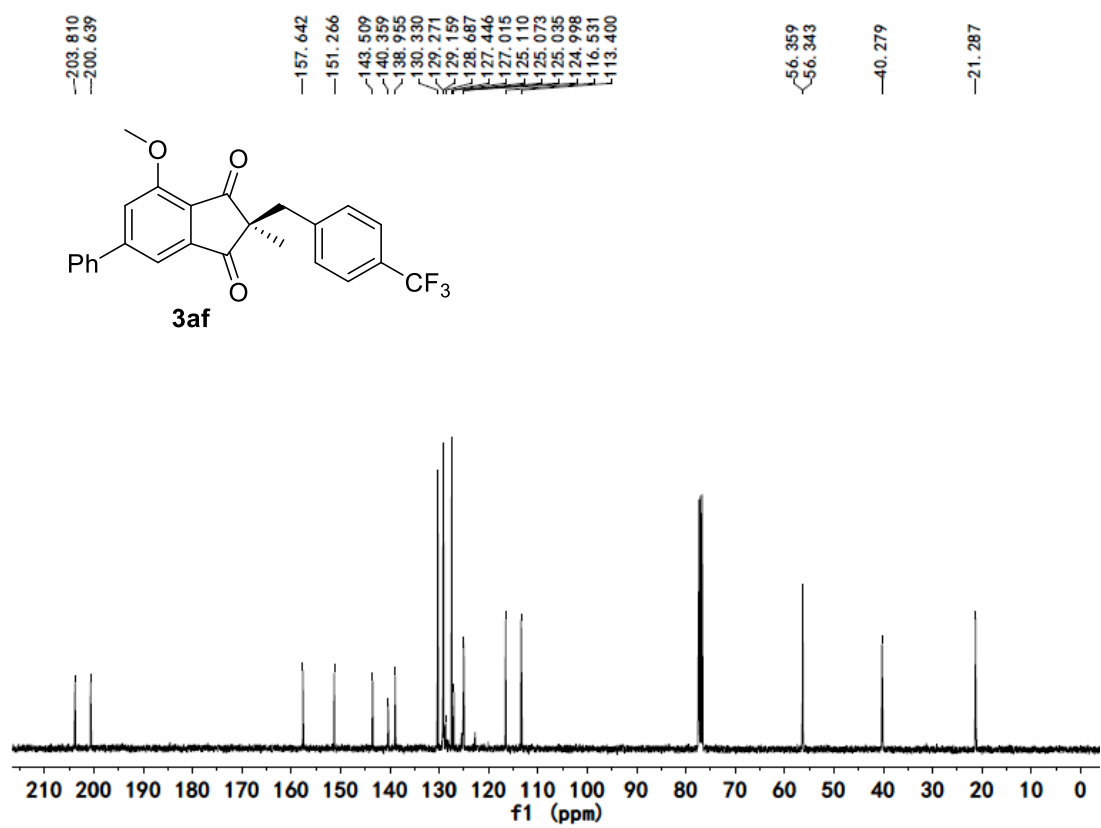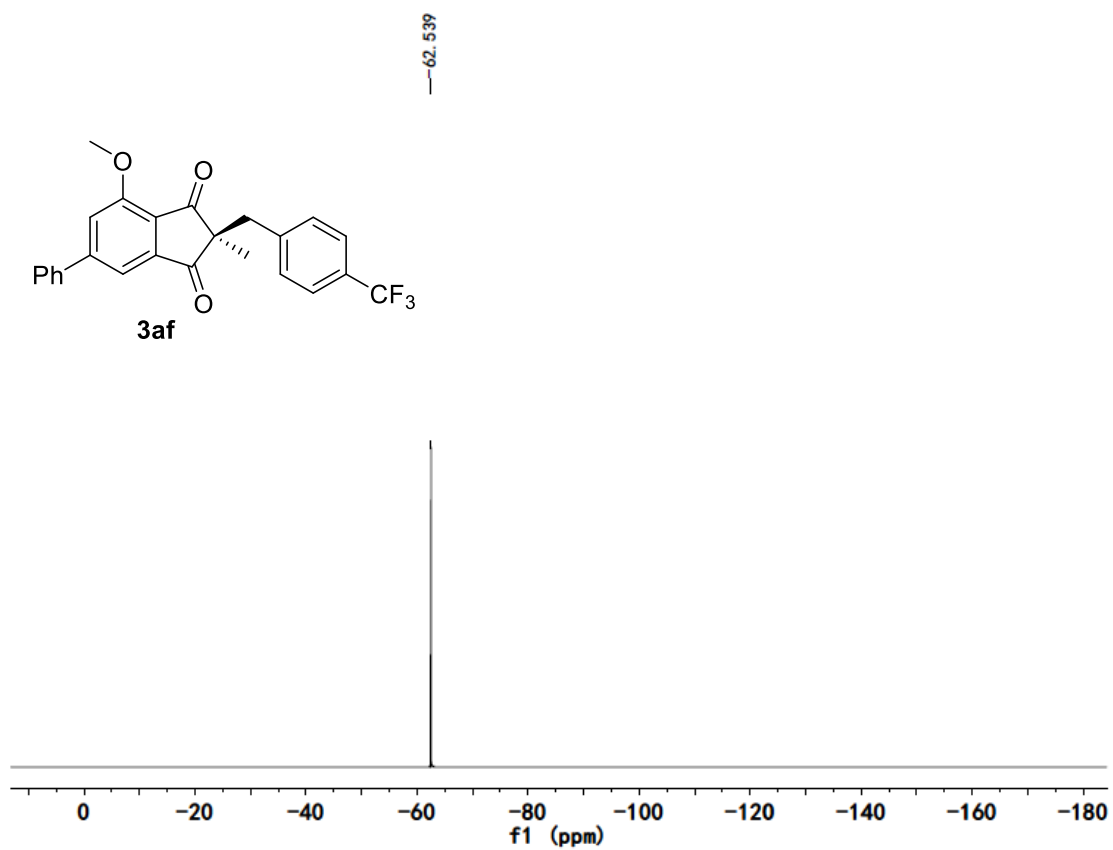



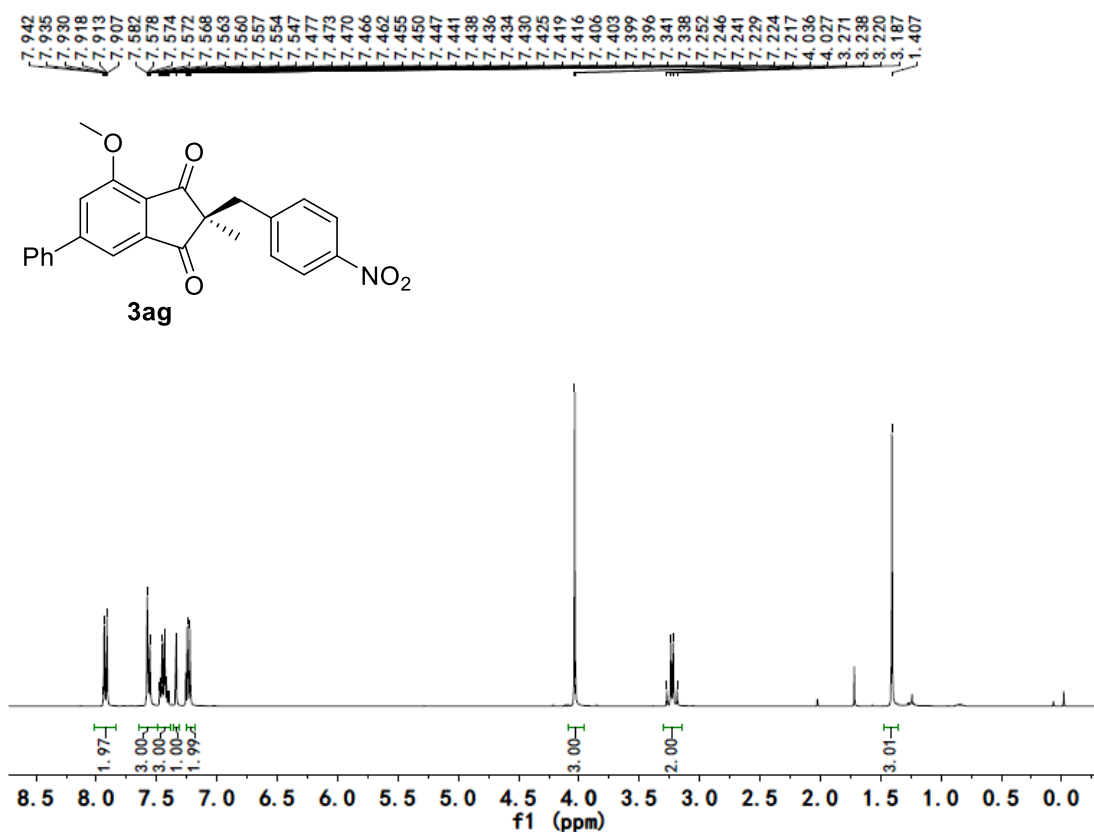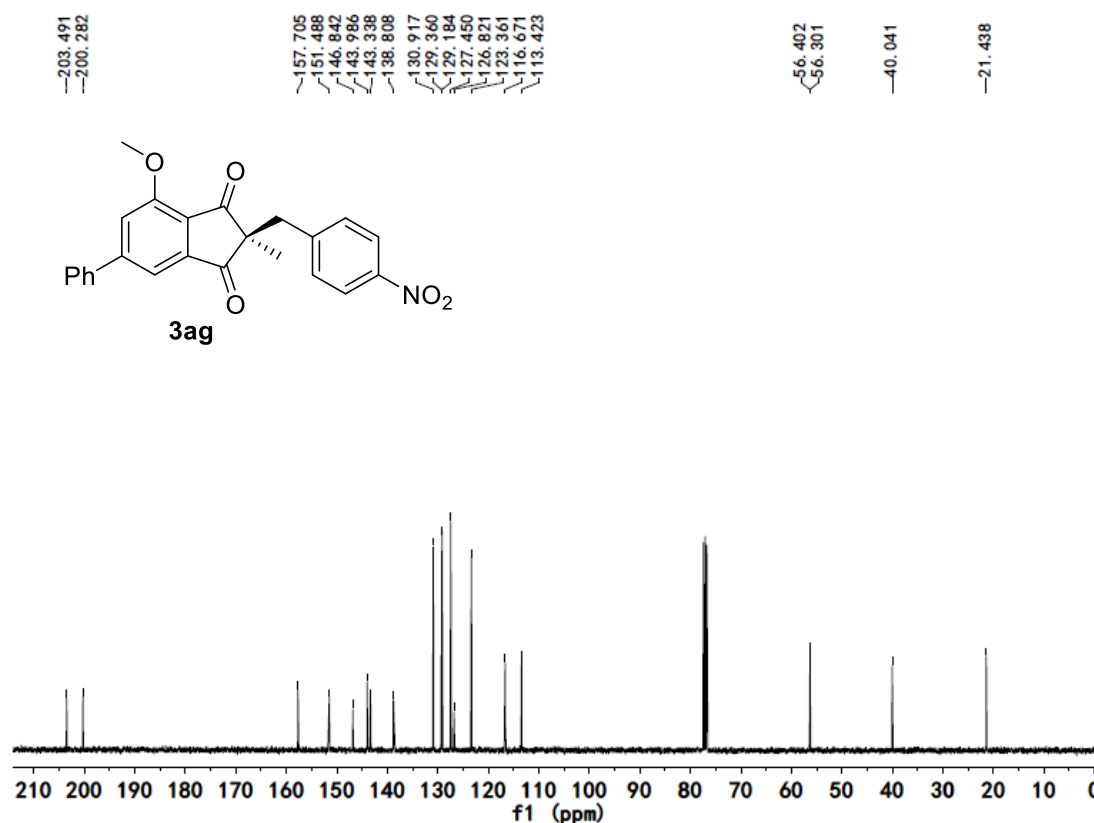

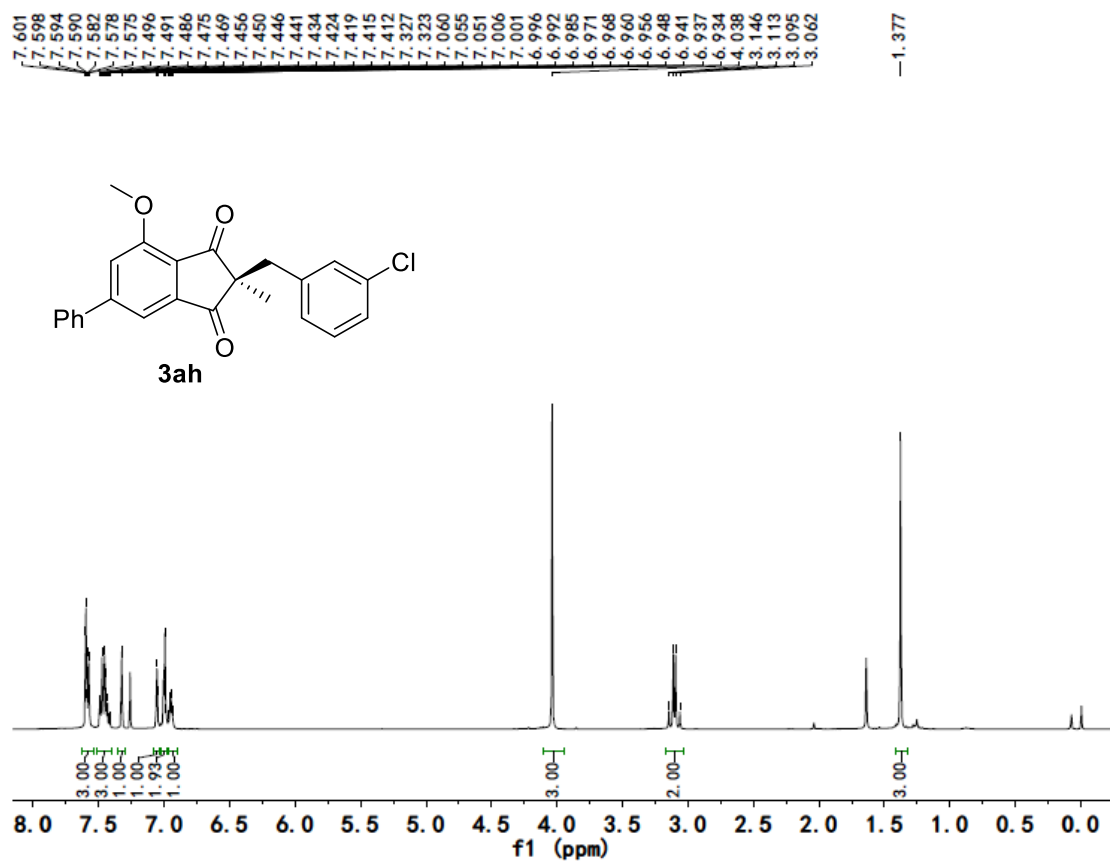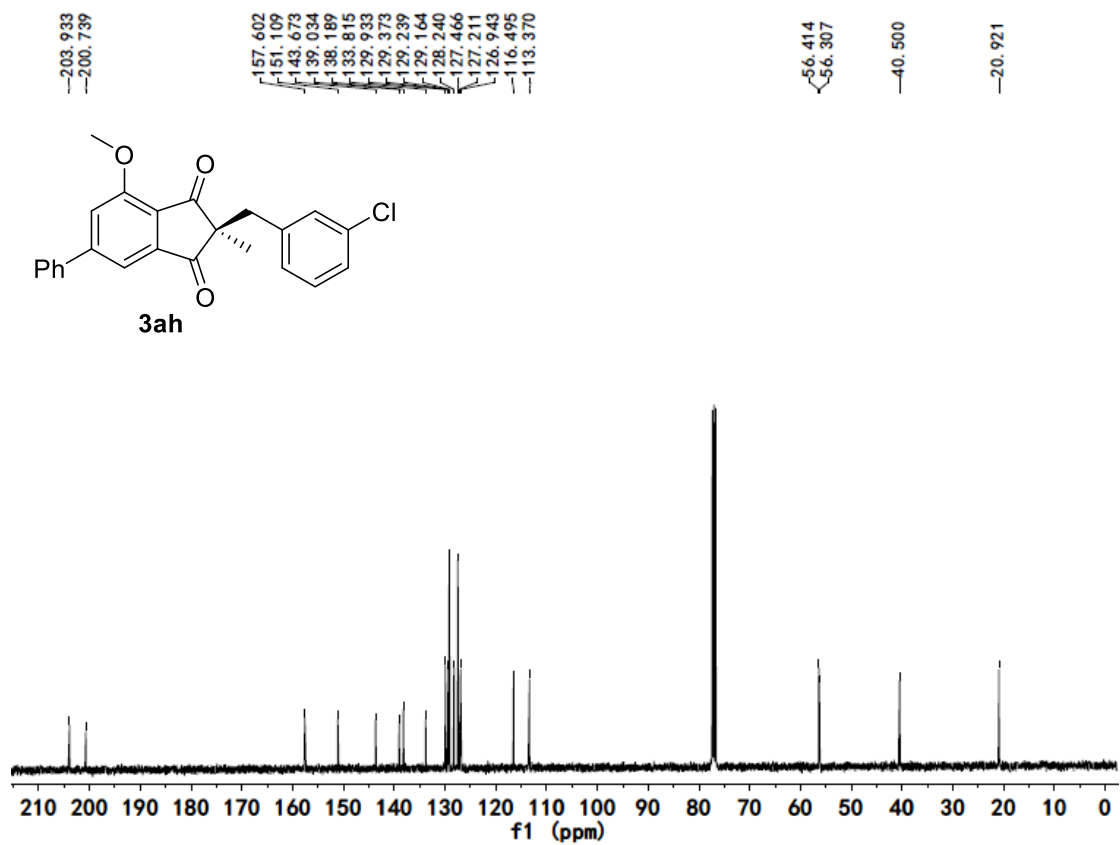

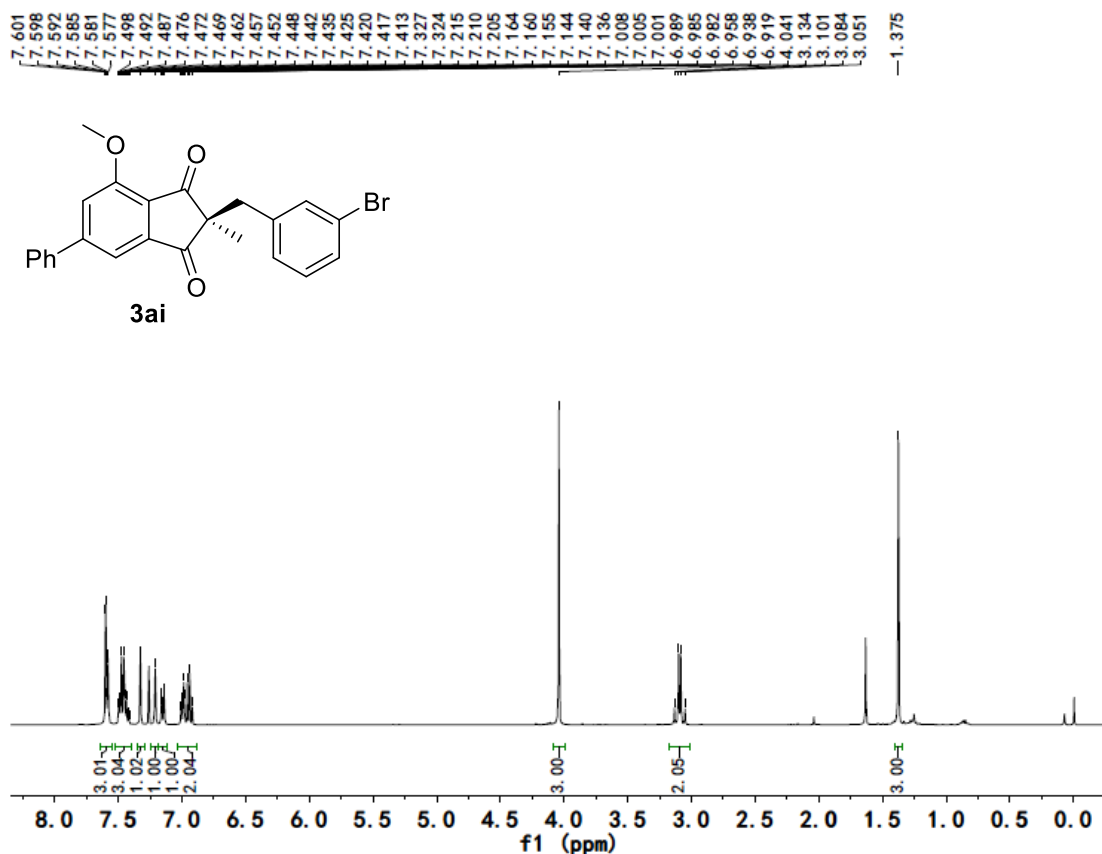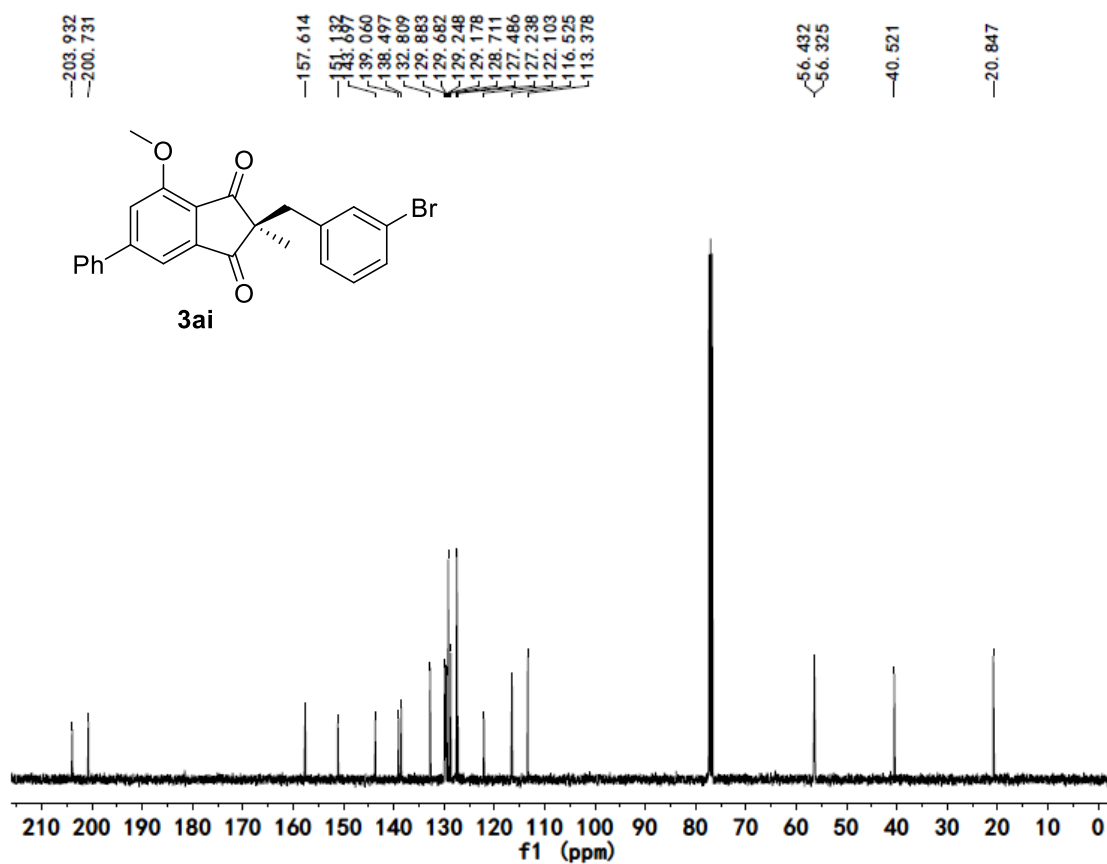

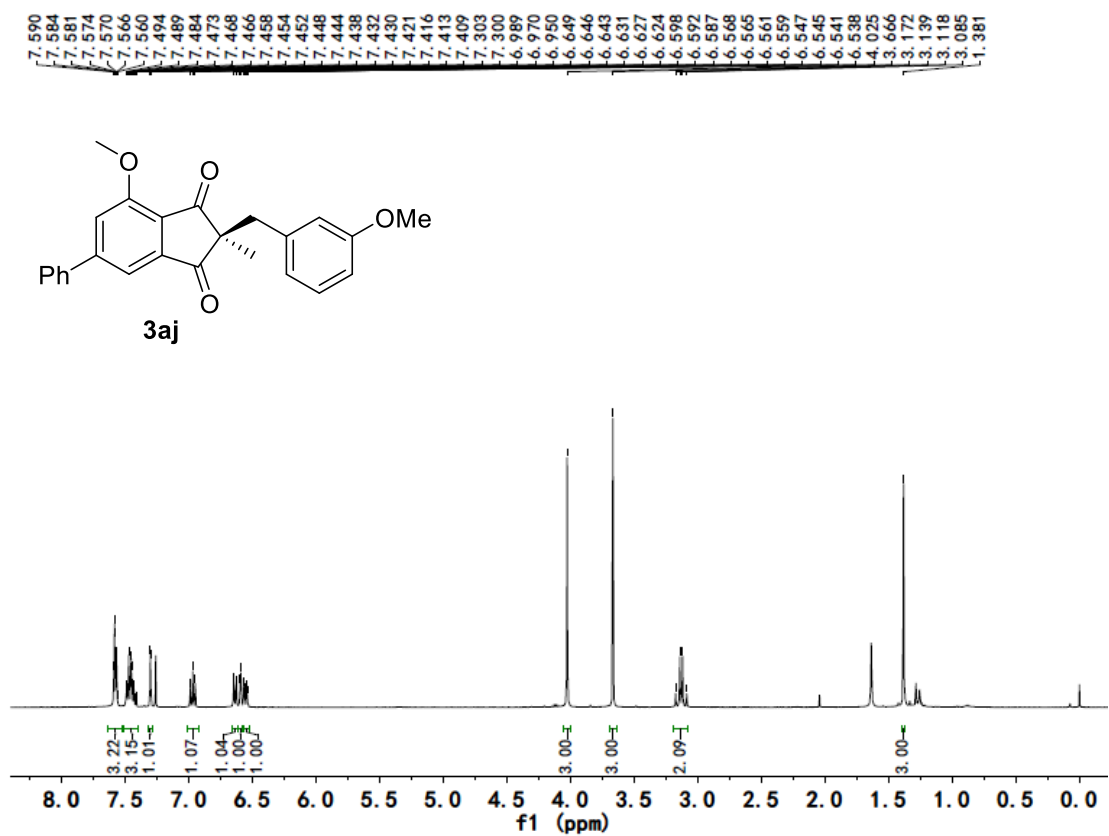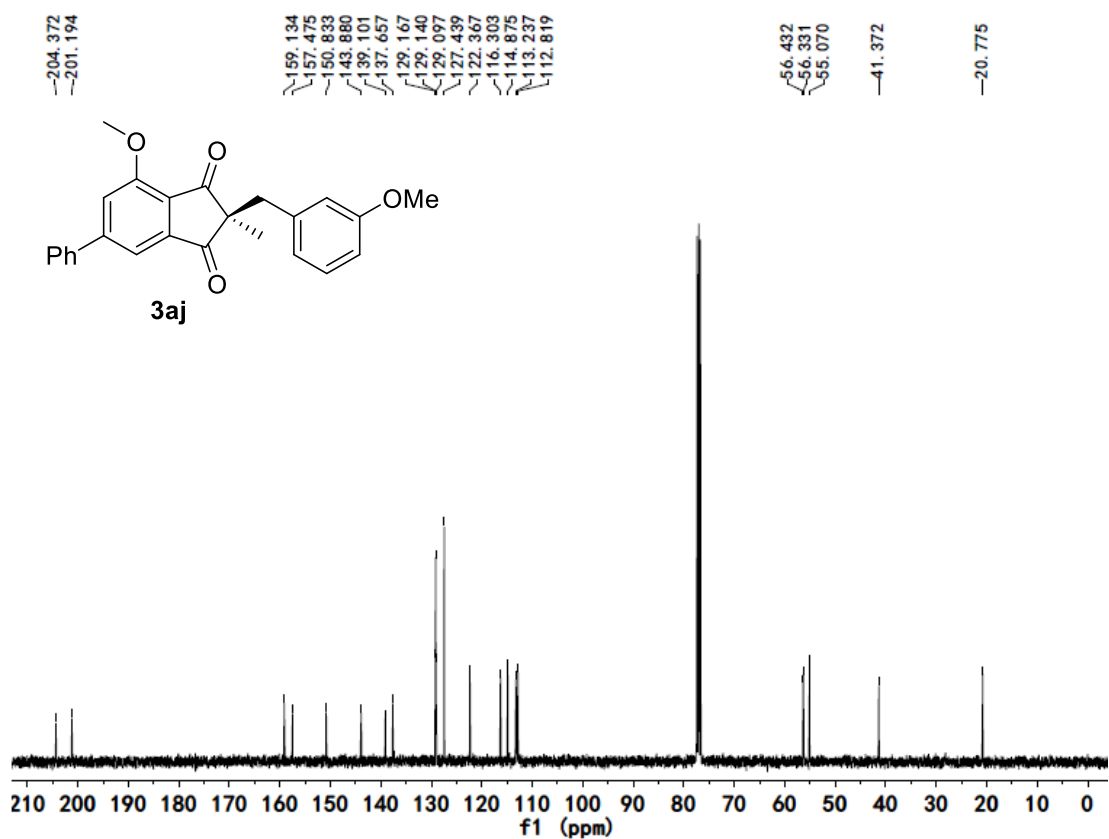

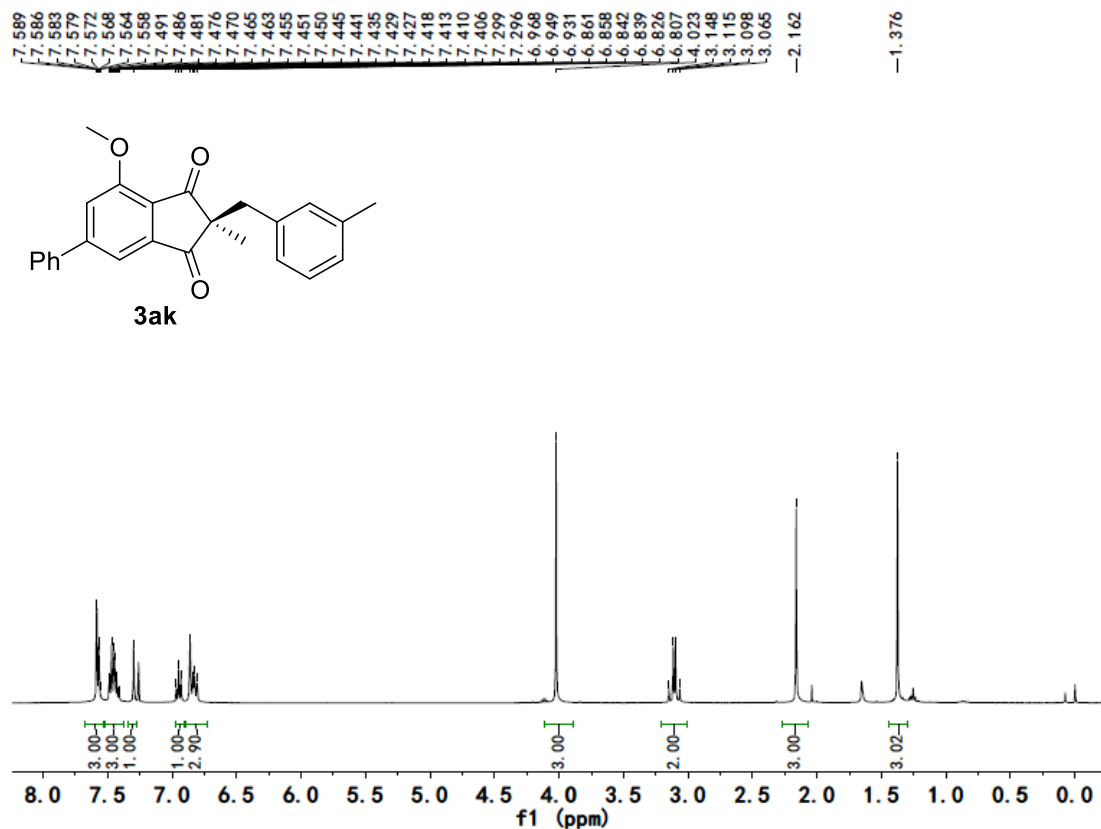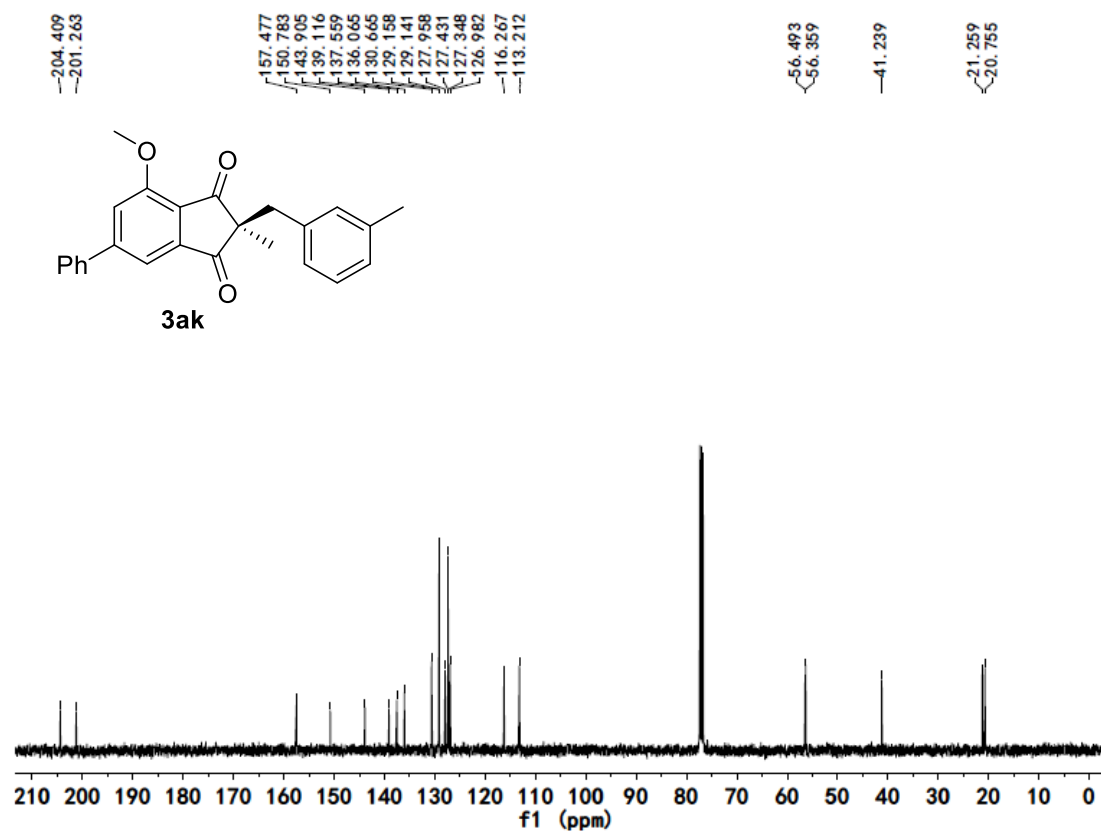

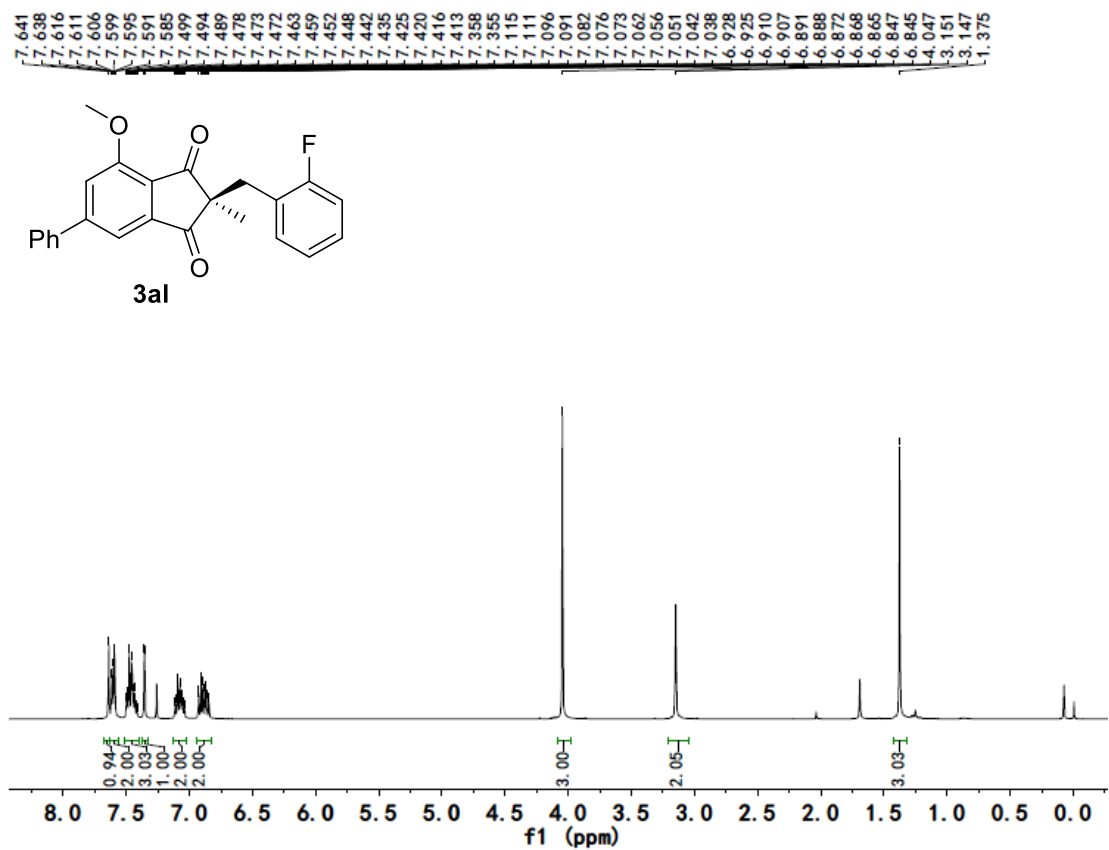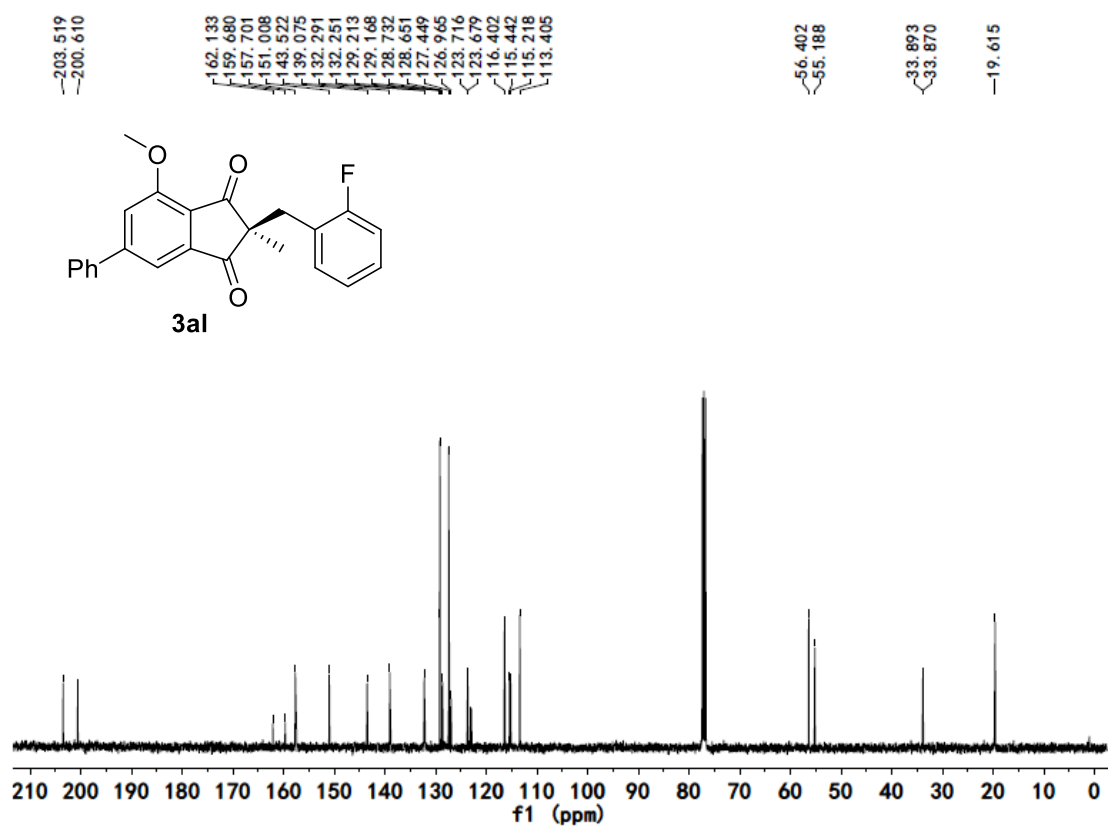

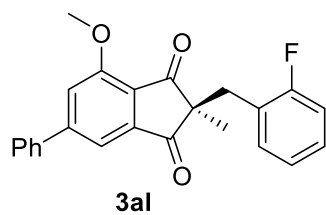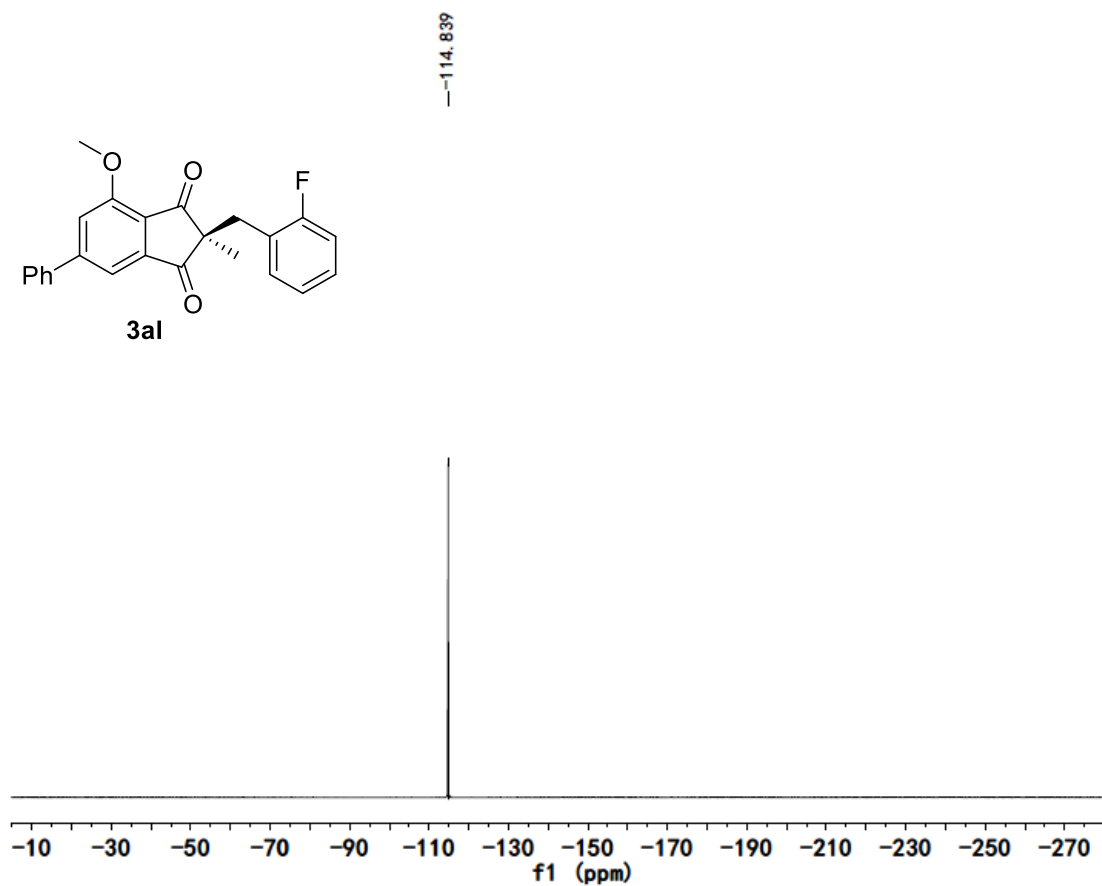

7.654  
7.650  
7.627  
7.623  
7.618  
7.611  
7.606  
7.603  
7.596  
7.505  
7.500  
7.495  
7.489  
7.484  
7.479  
7.477  
7.469  
7.465  
7.460  
7.456  
7.452  
7.446  
7.439  
7.430  
7.424  
7.421  
7.417  
7.377  
7.374  
7.247  
7.239  
7.232  
7.228  
7.224  
7.216  
7.206  
7.175  
7.165  
7.156  
7.152  
7.148  
7.141  
7.133  
7.129  
7.069  
7.066  
7.058  
7.051  
7.048  
7.045  
7.042  
7.035  
7.026  
7.024  
4.061  
4.057  
3.282  
1.384

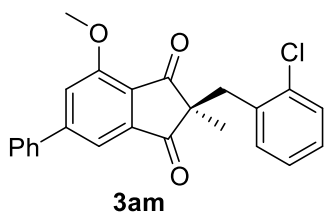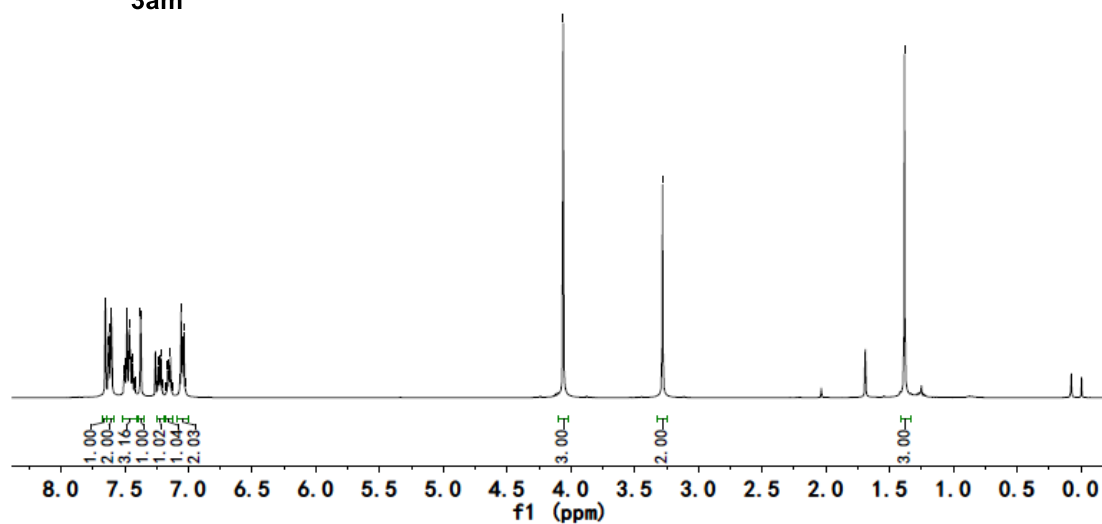

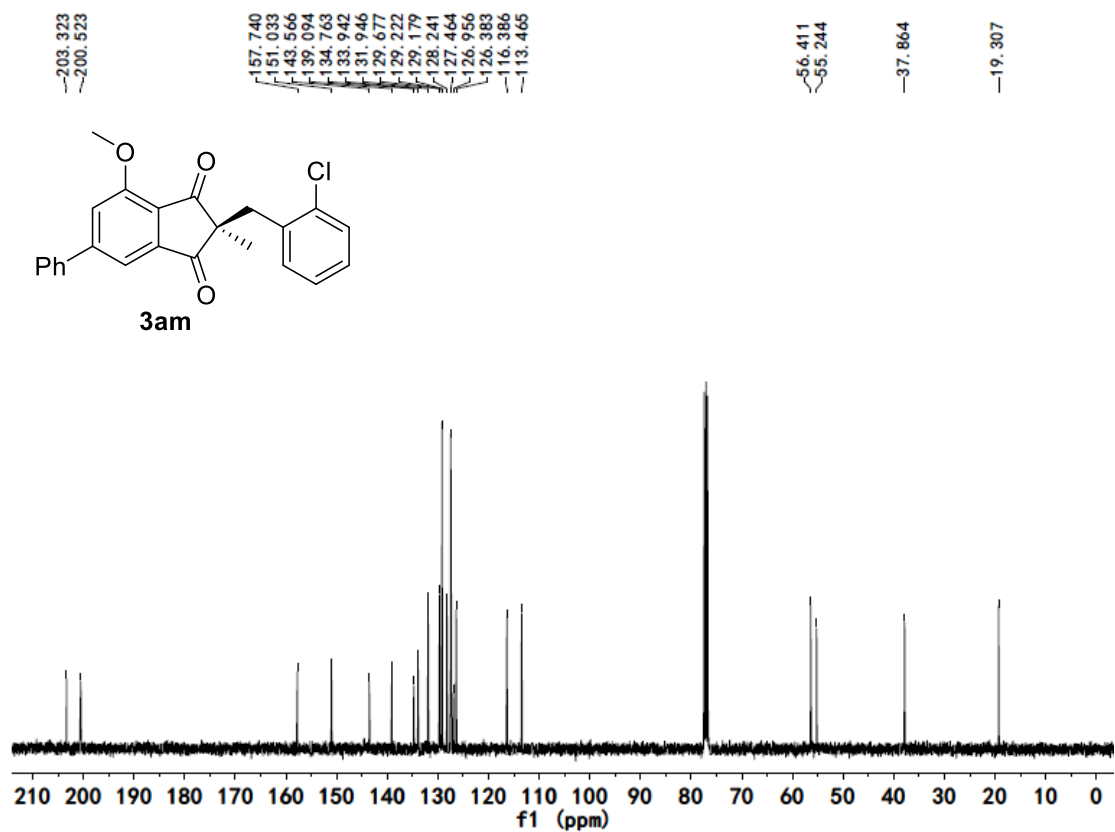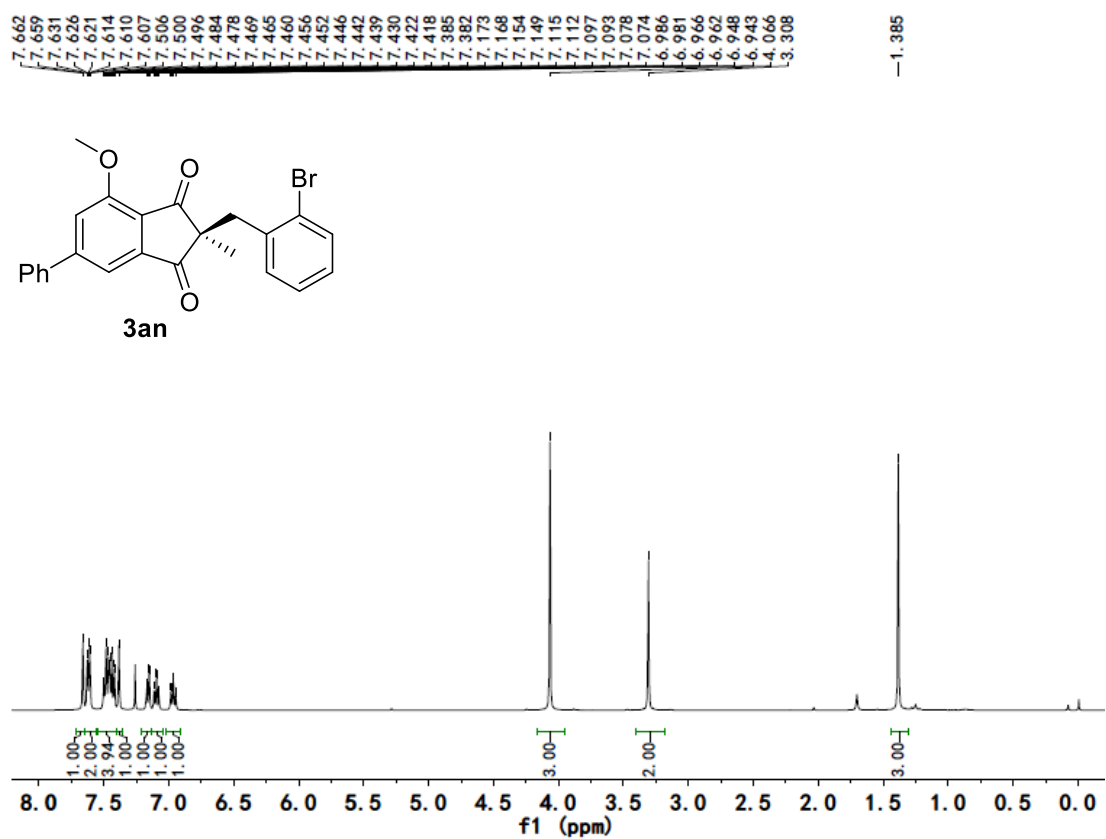



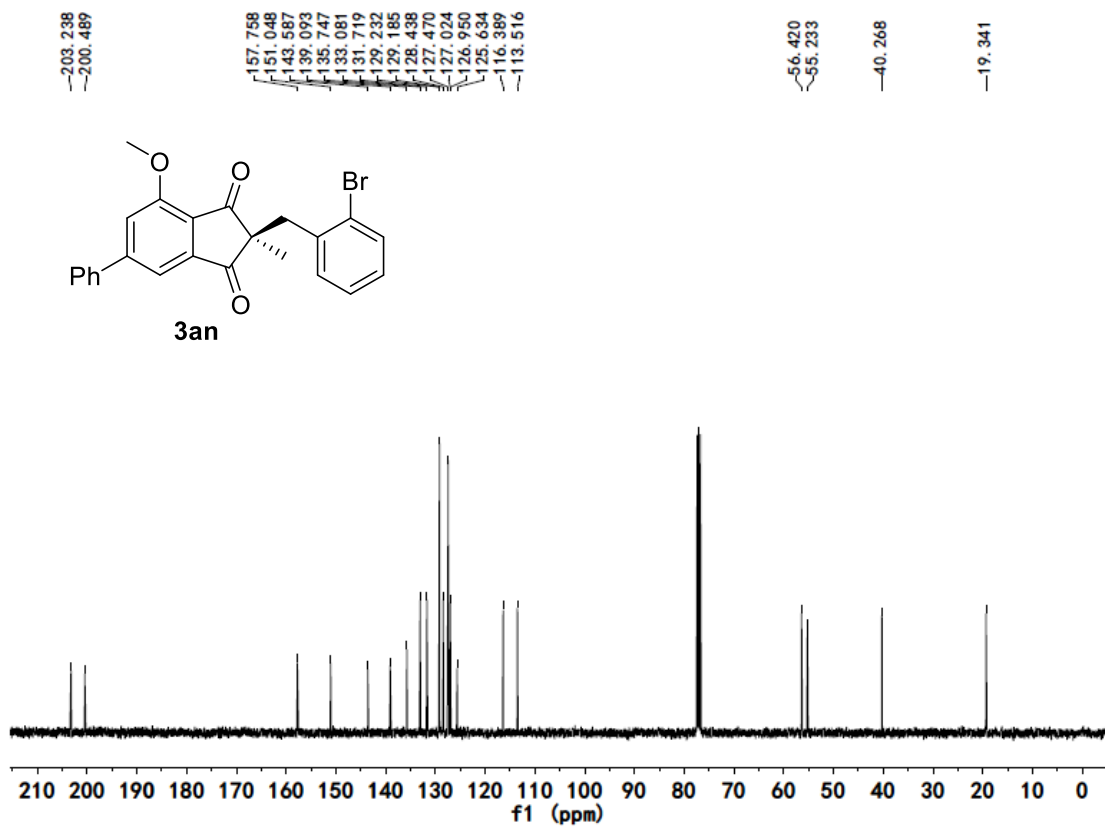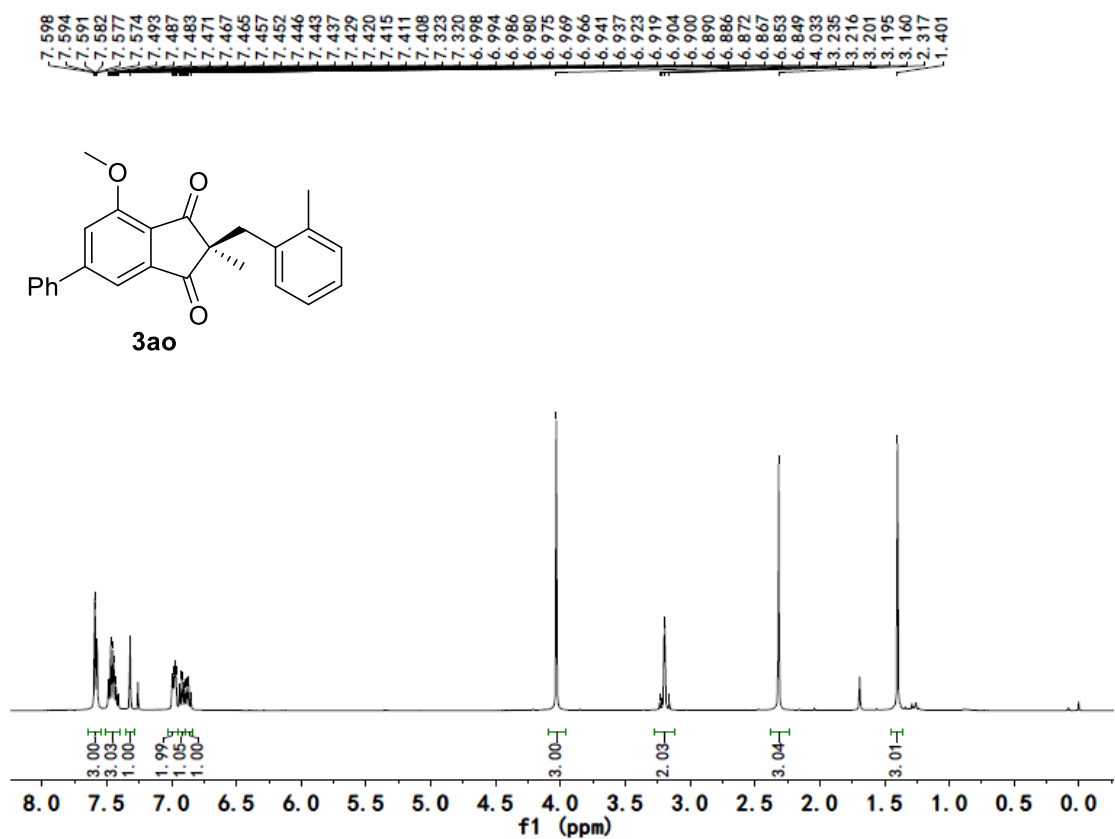

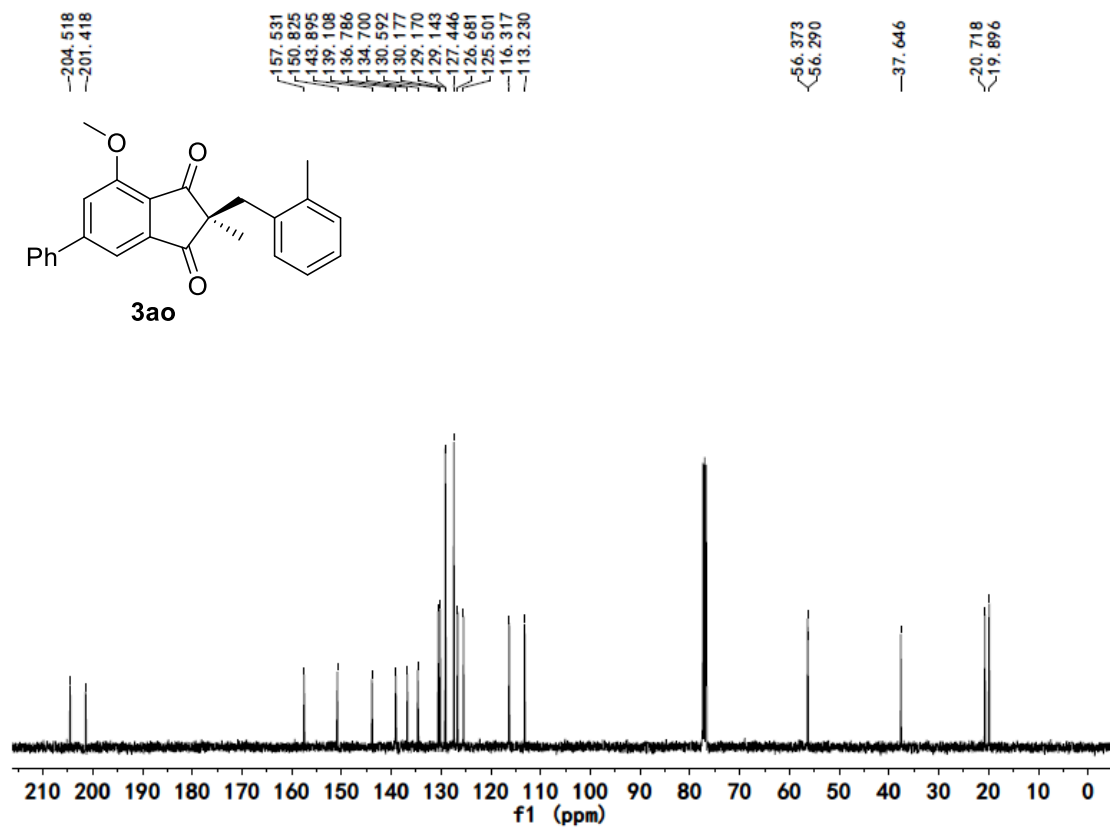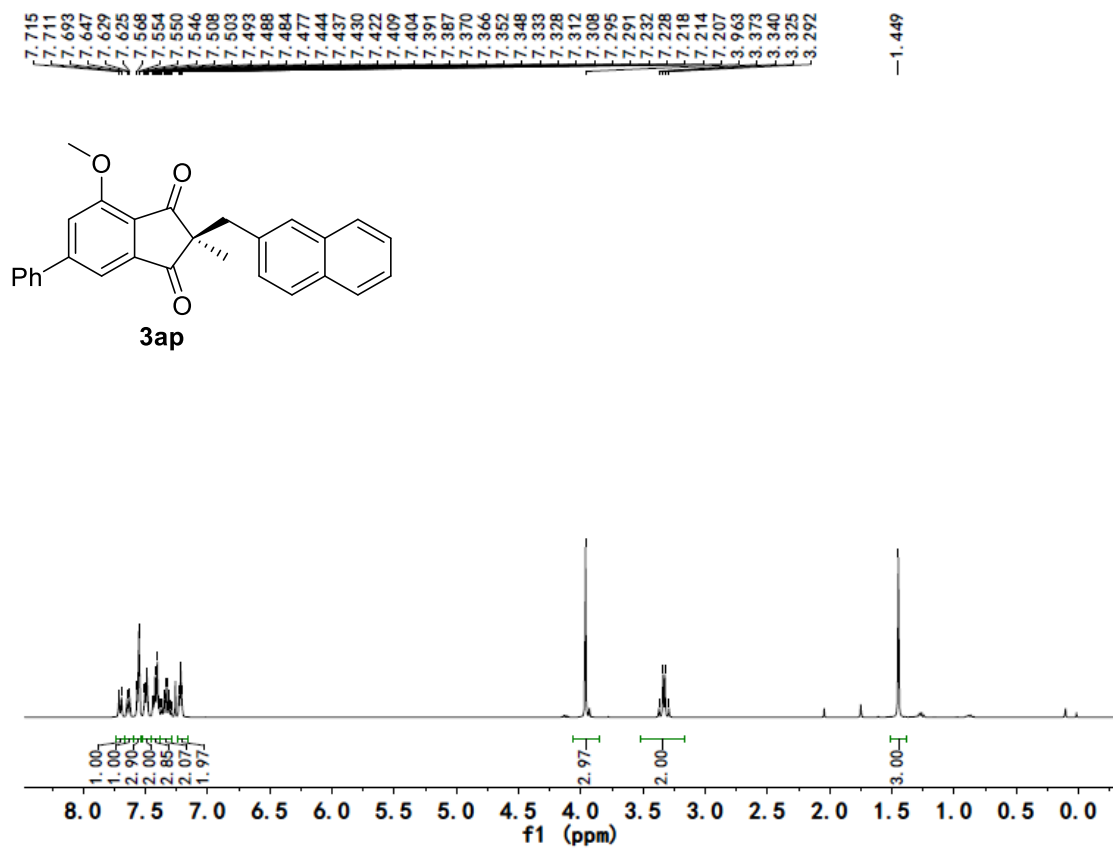

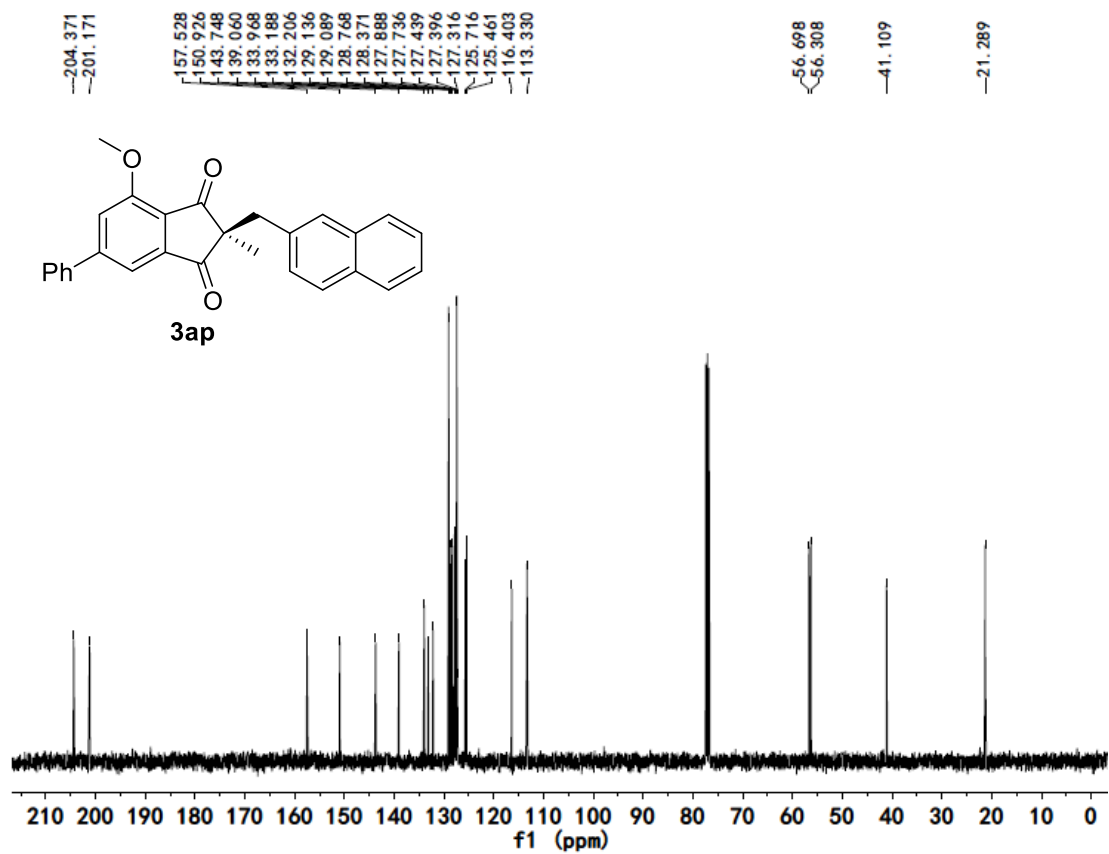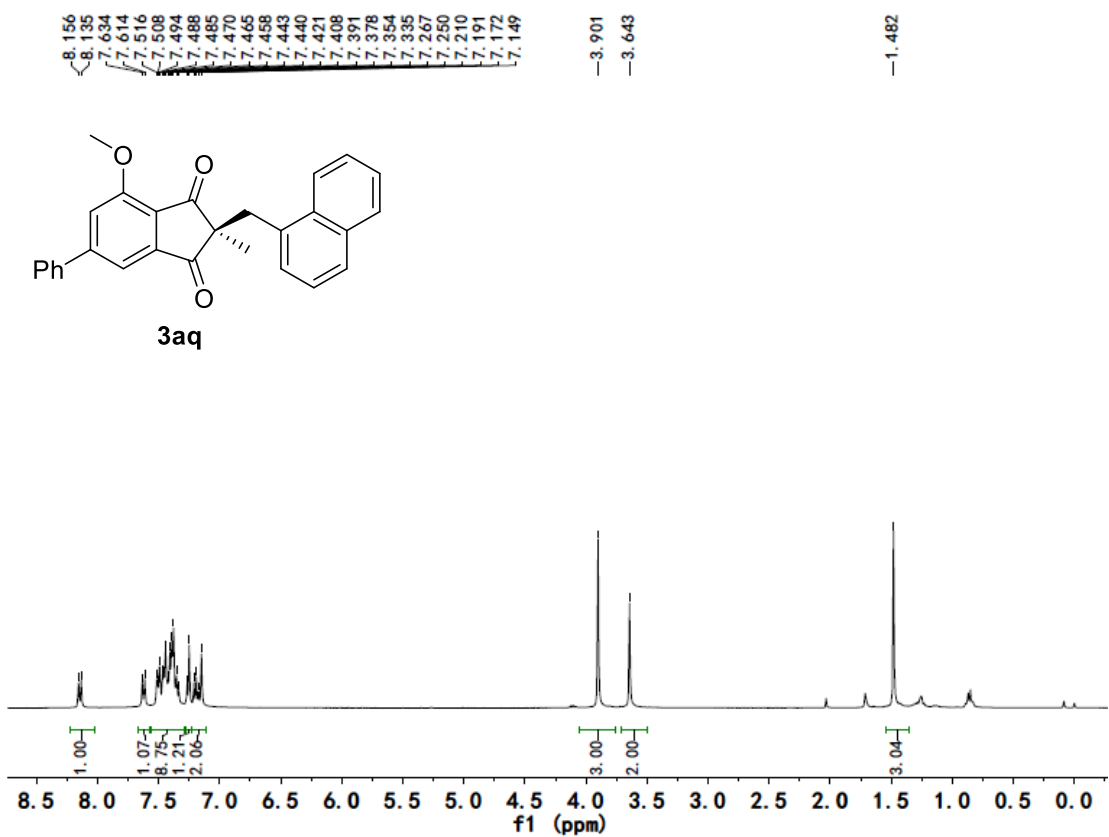

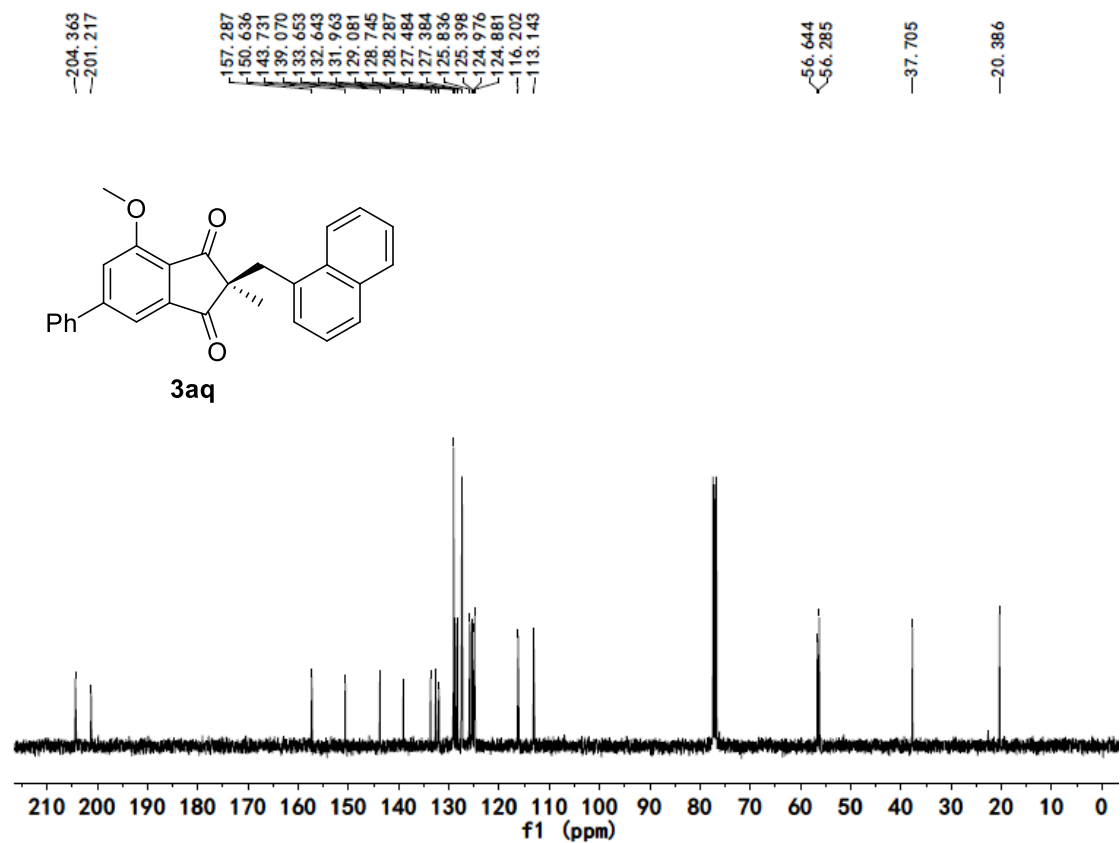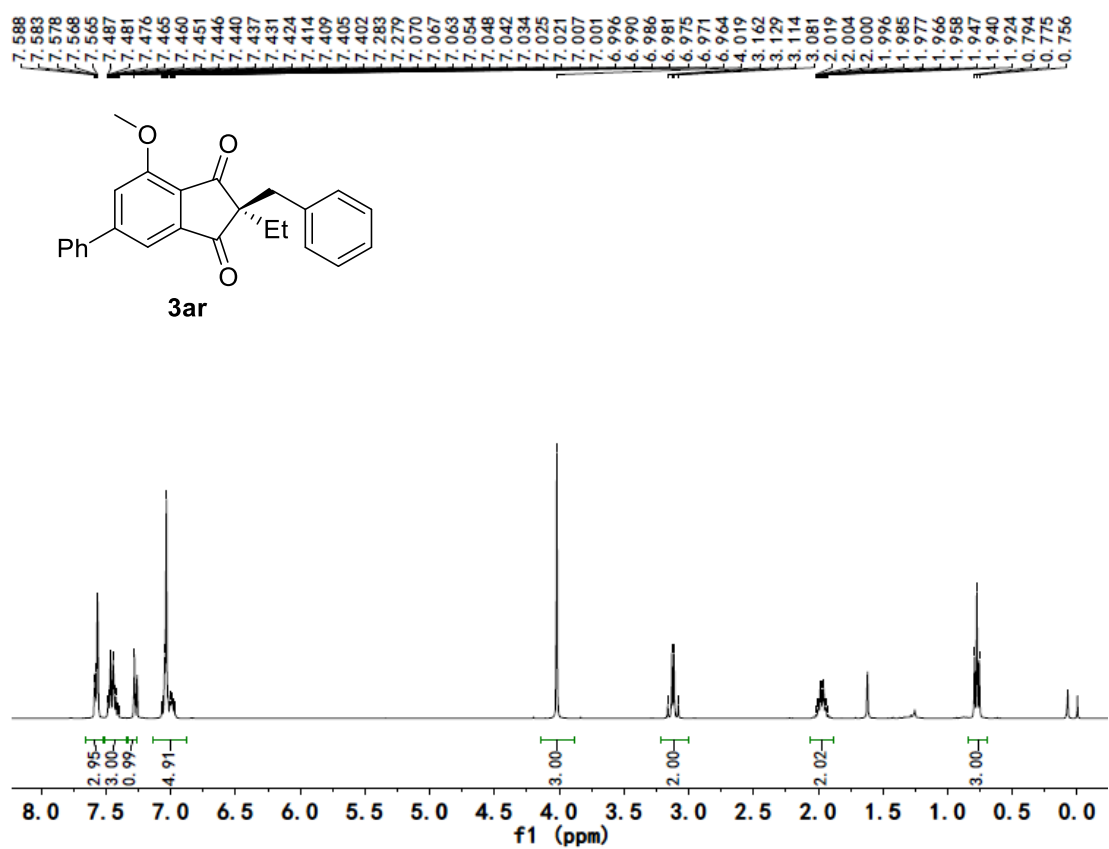

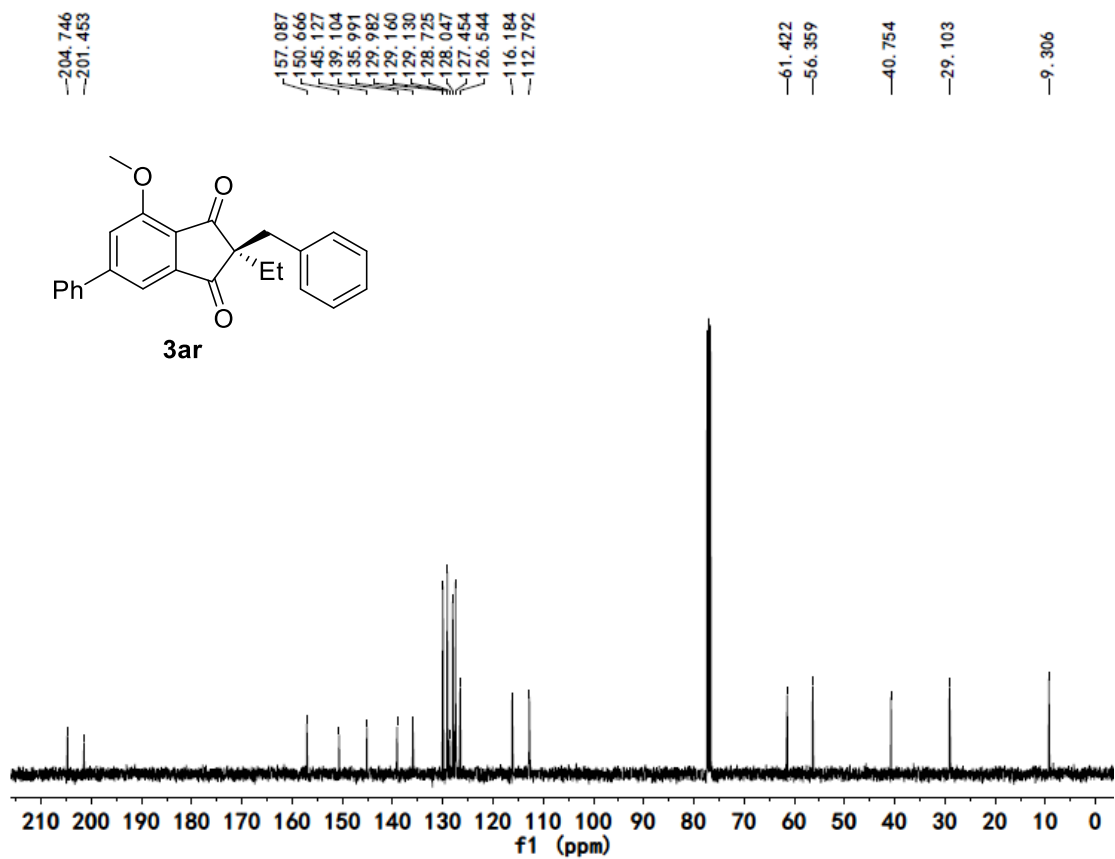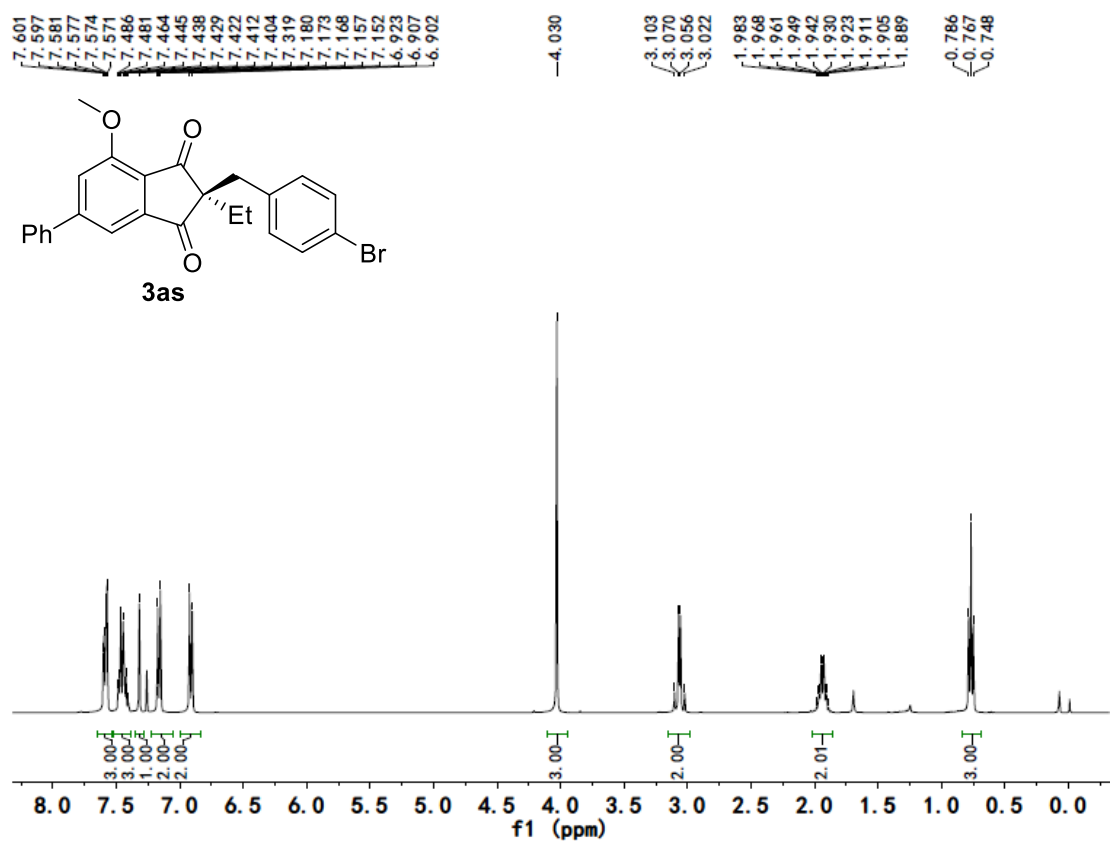

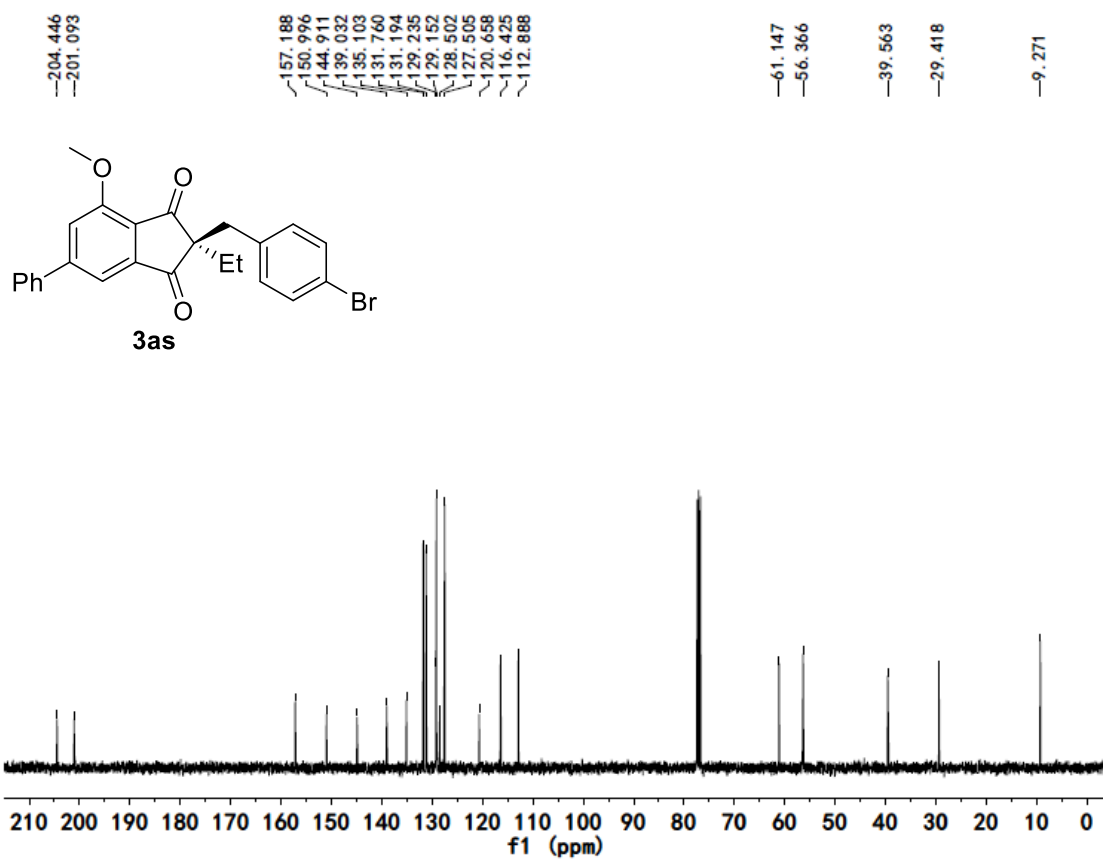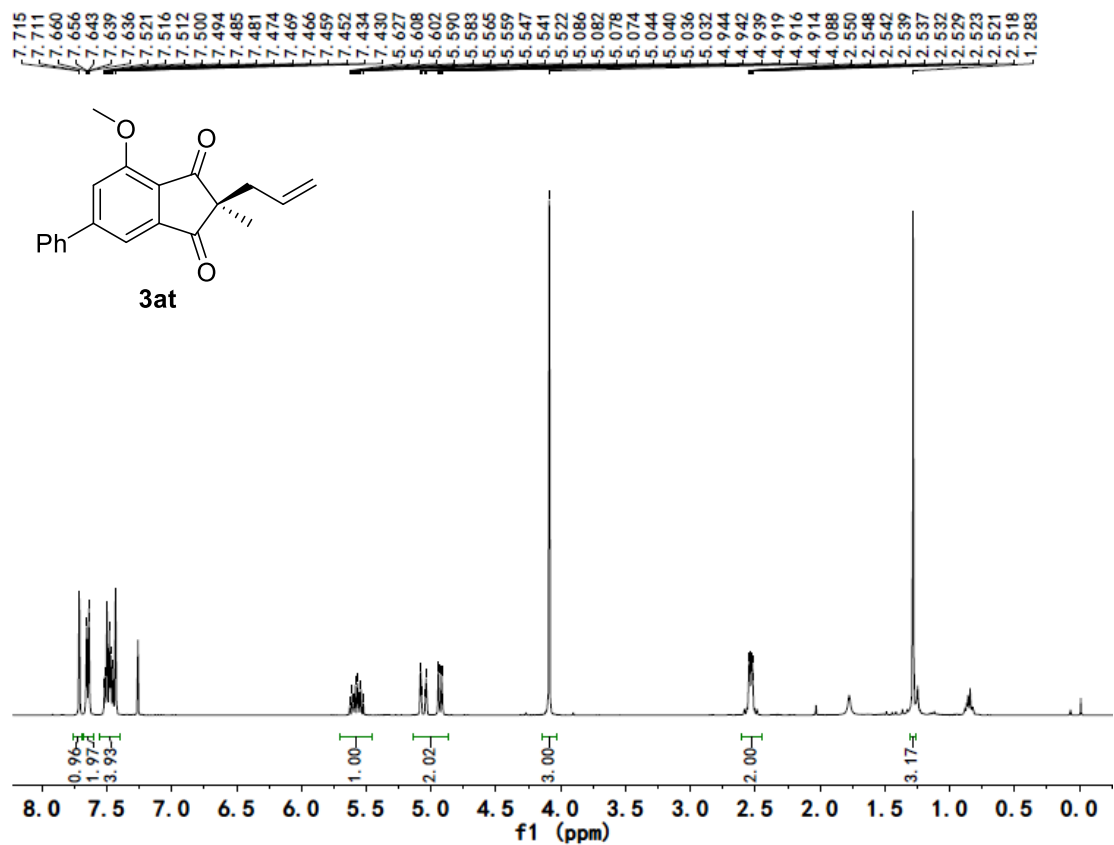

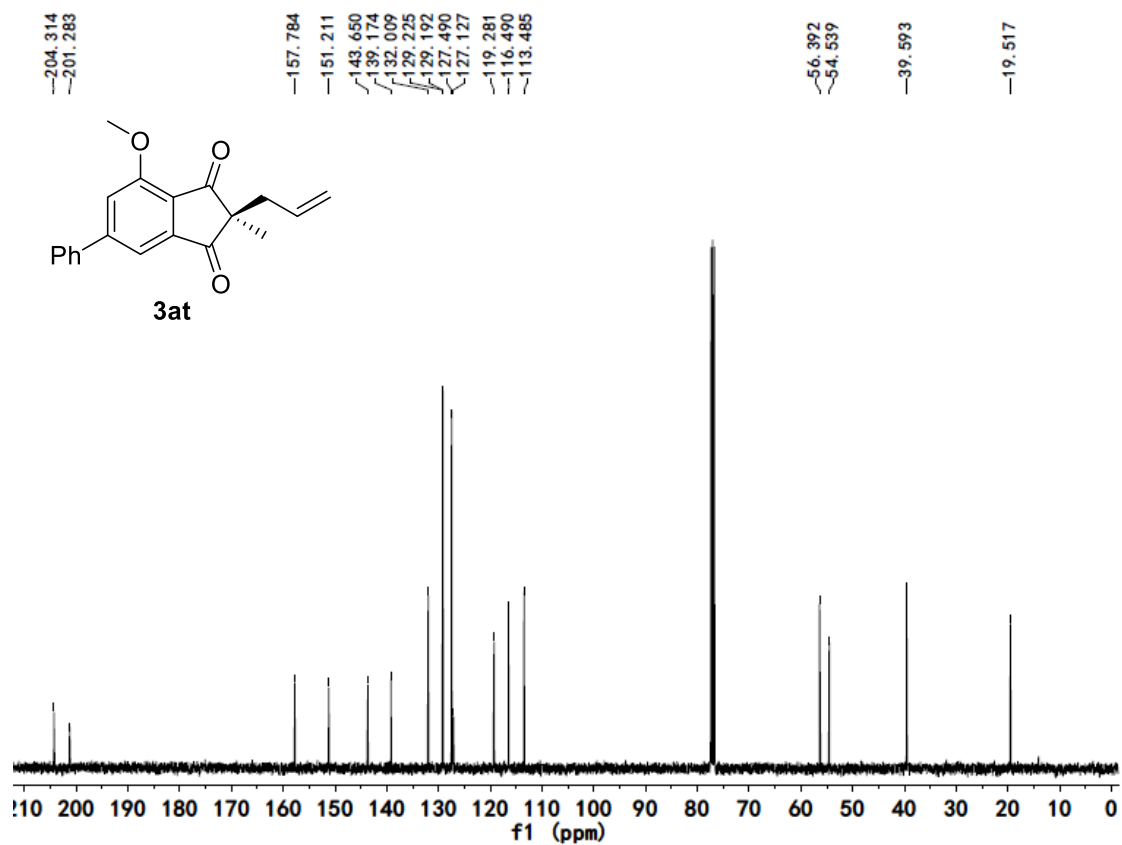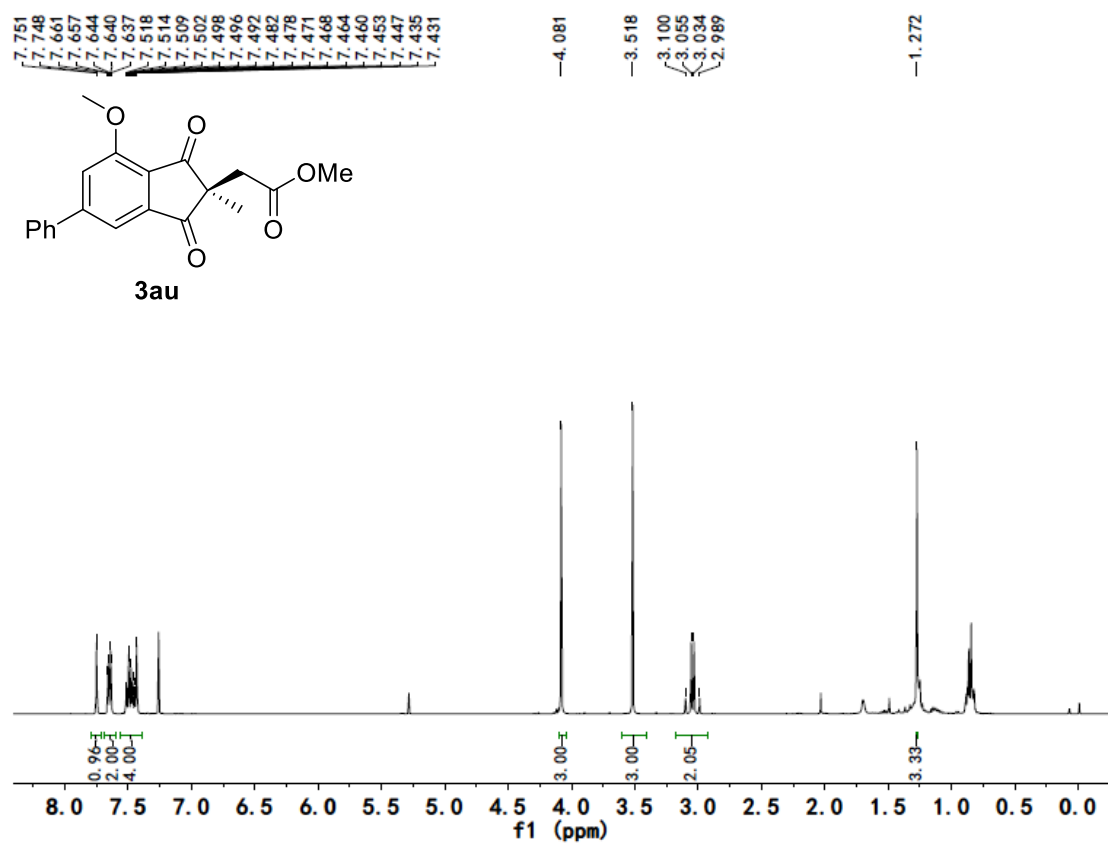

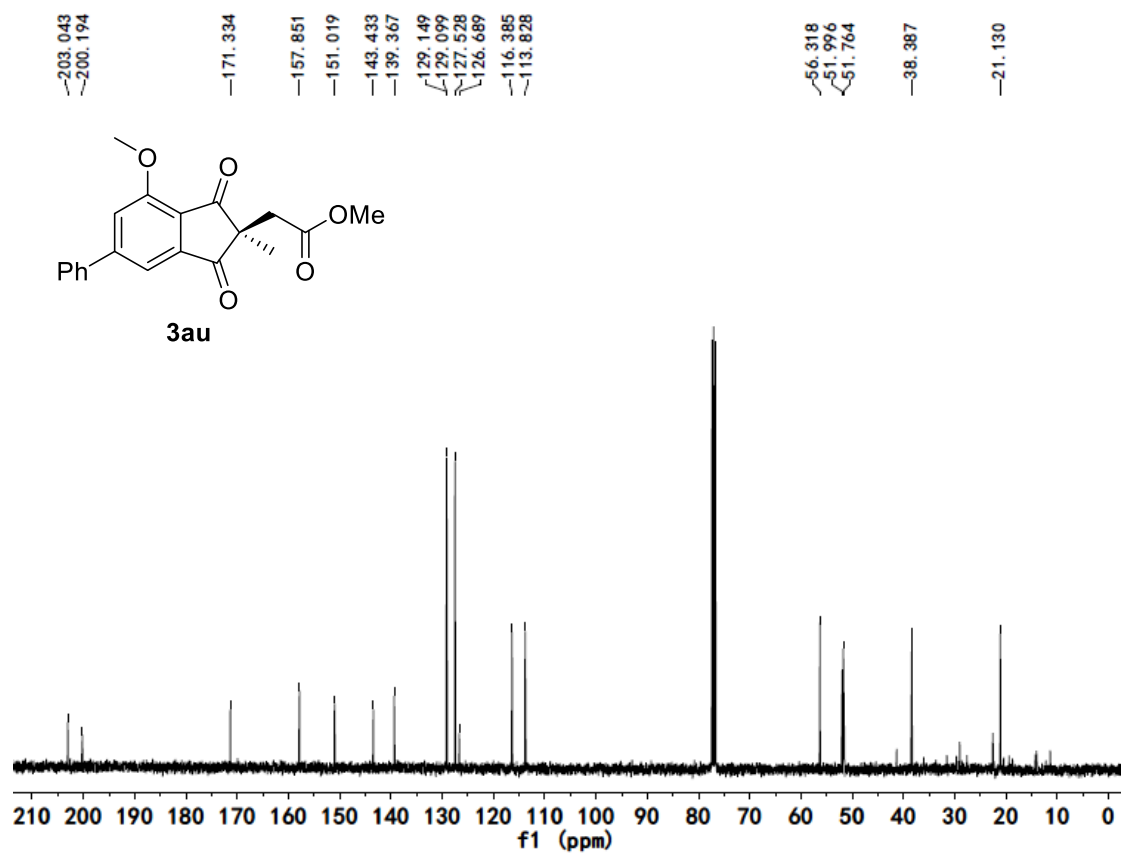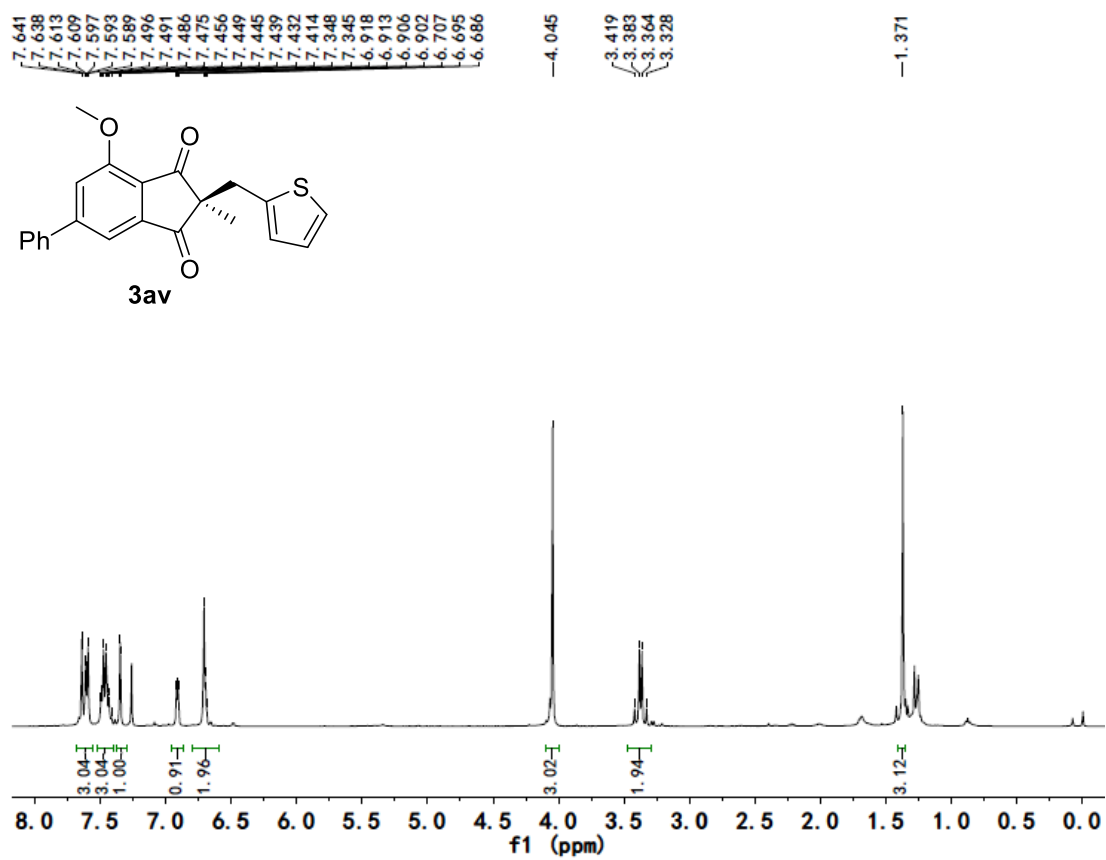



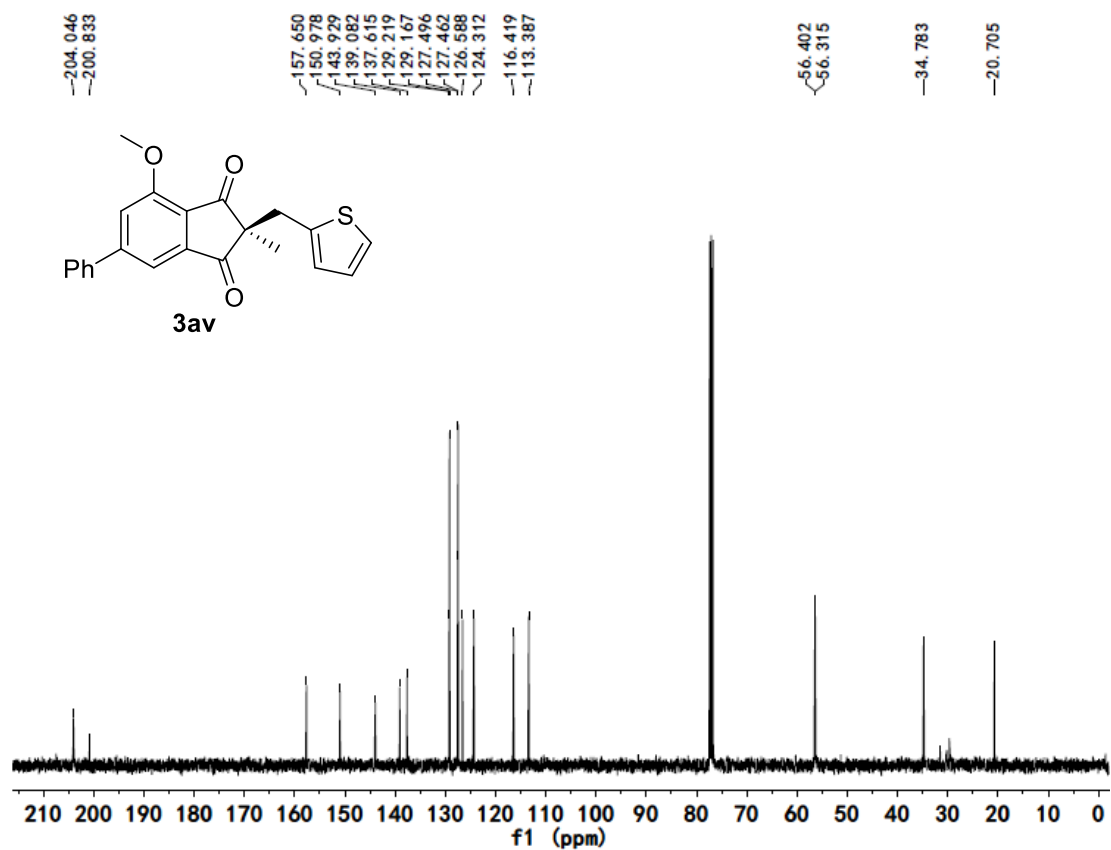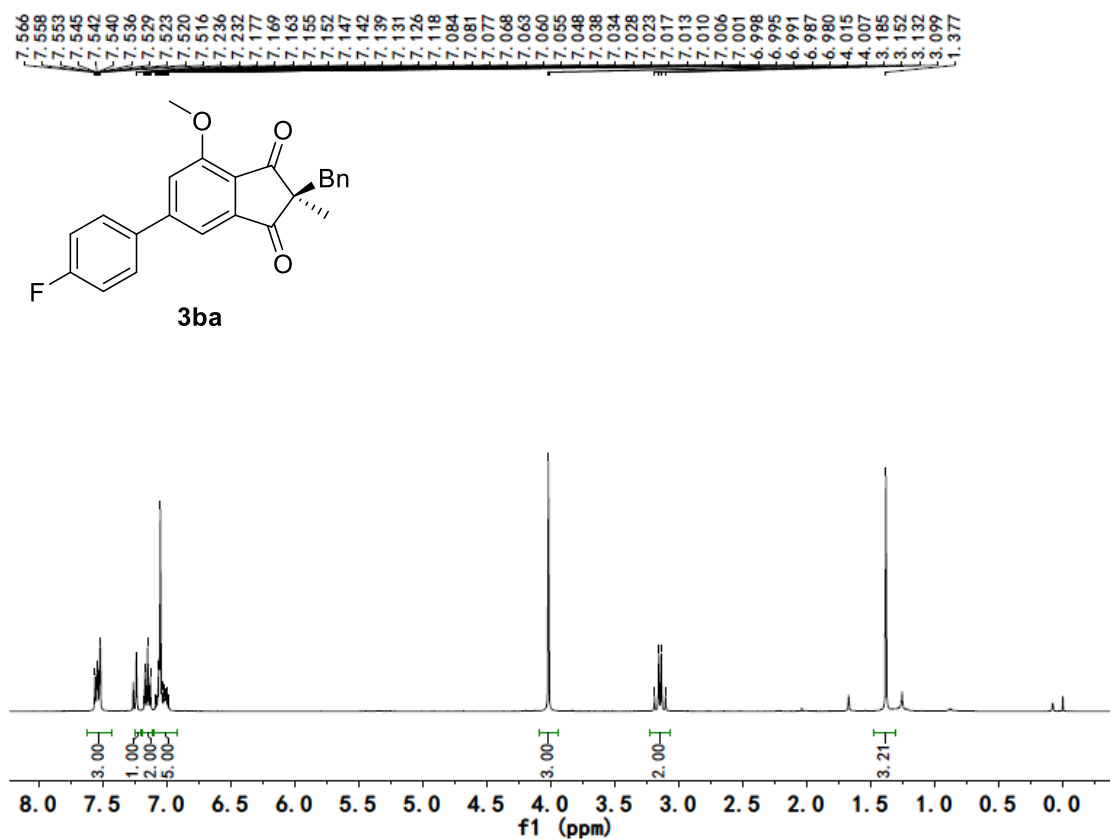

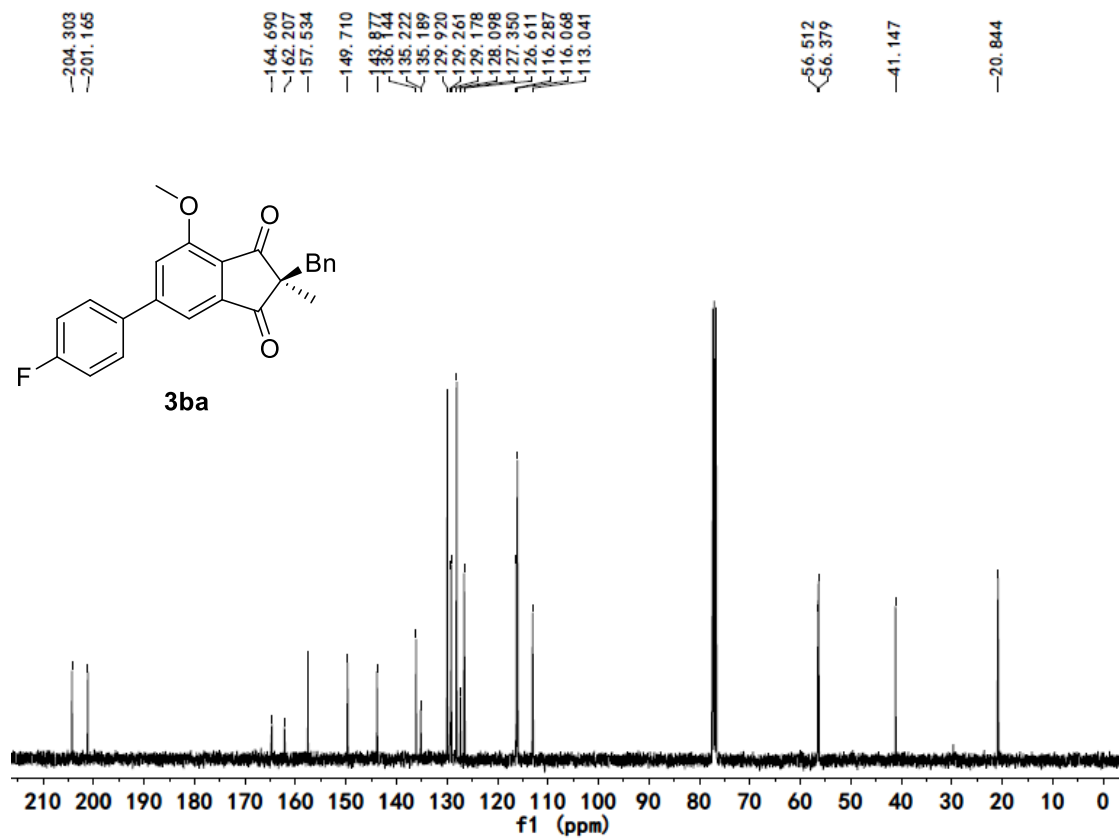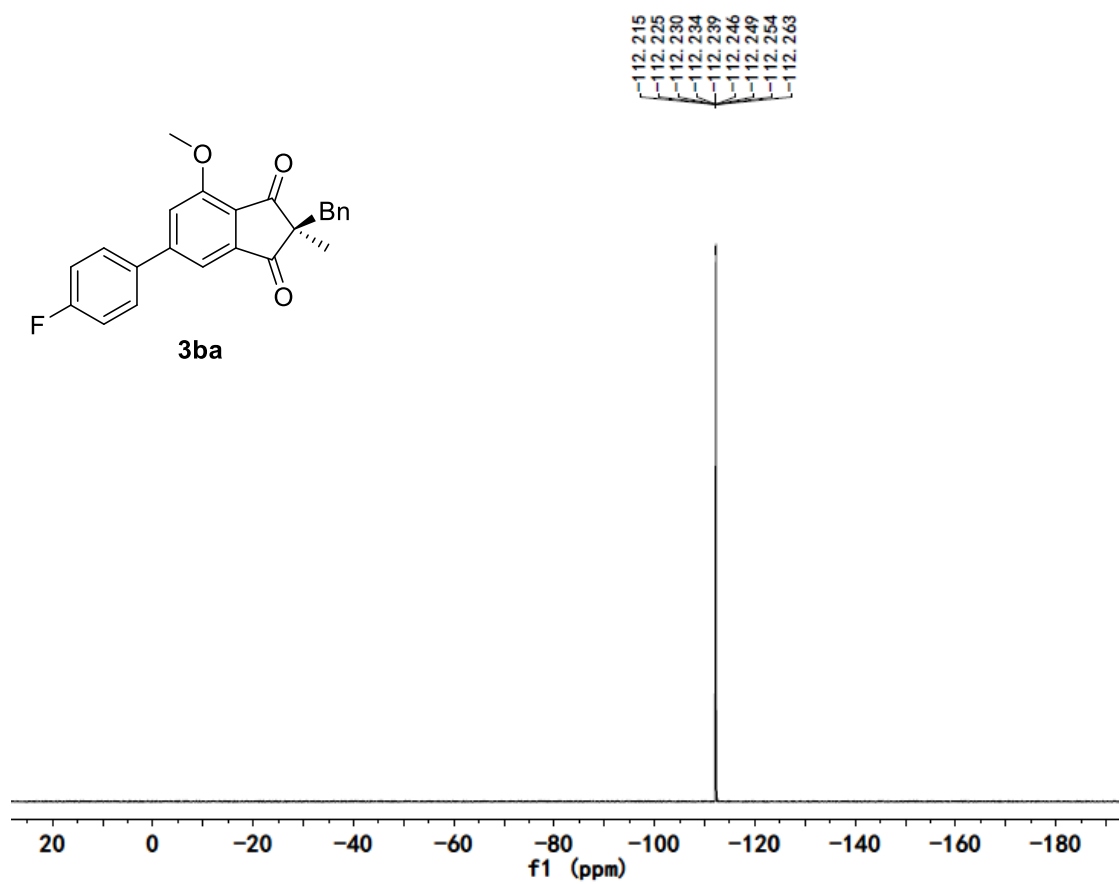

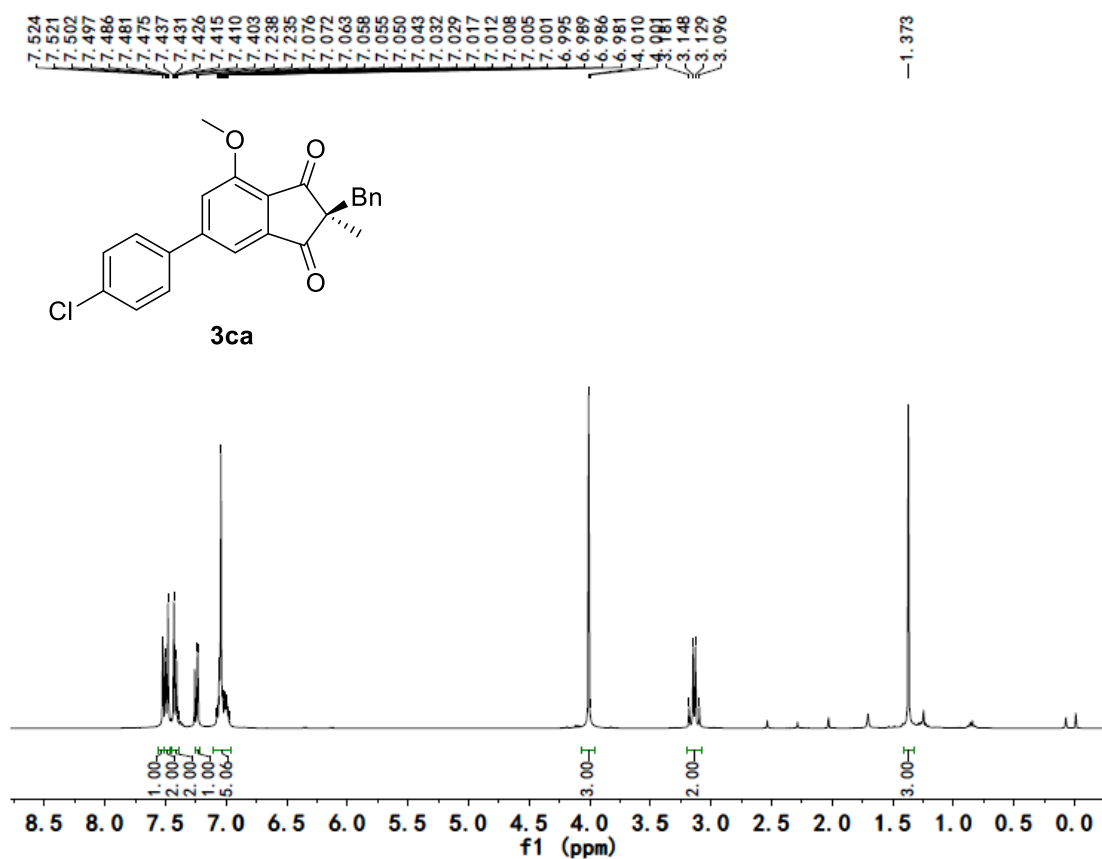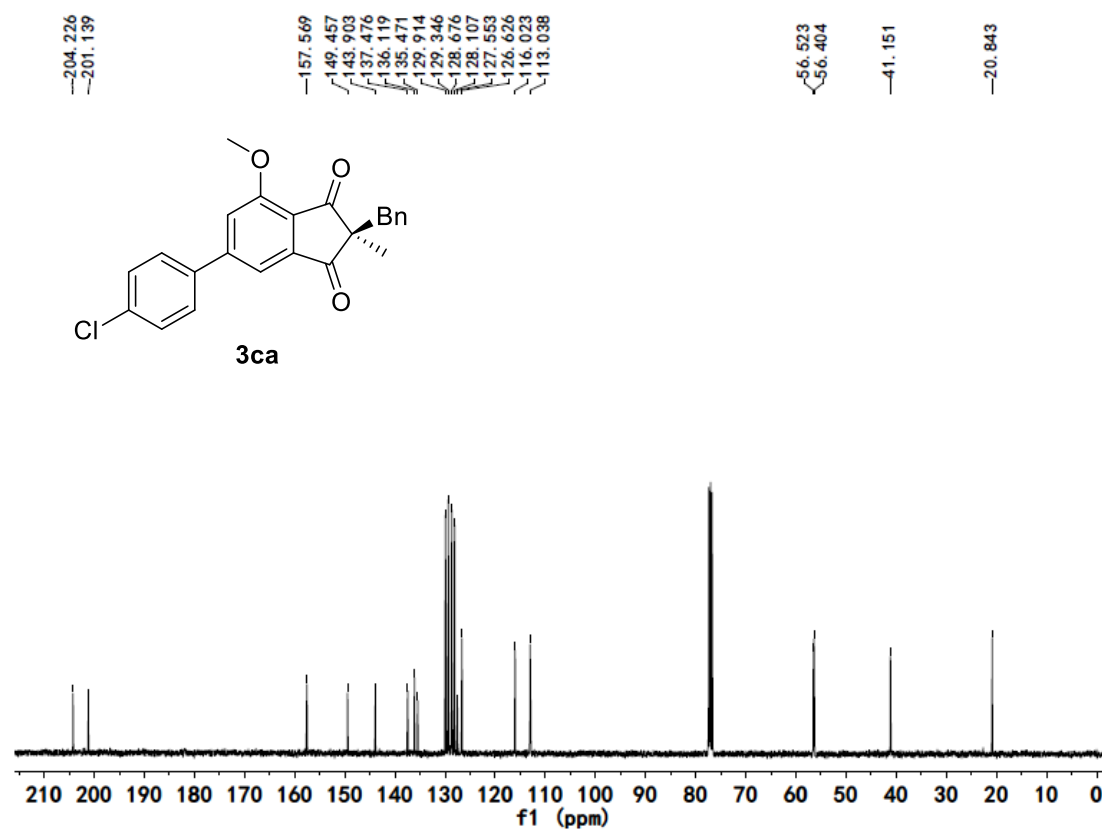

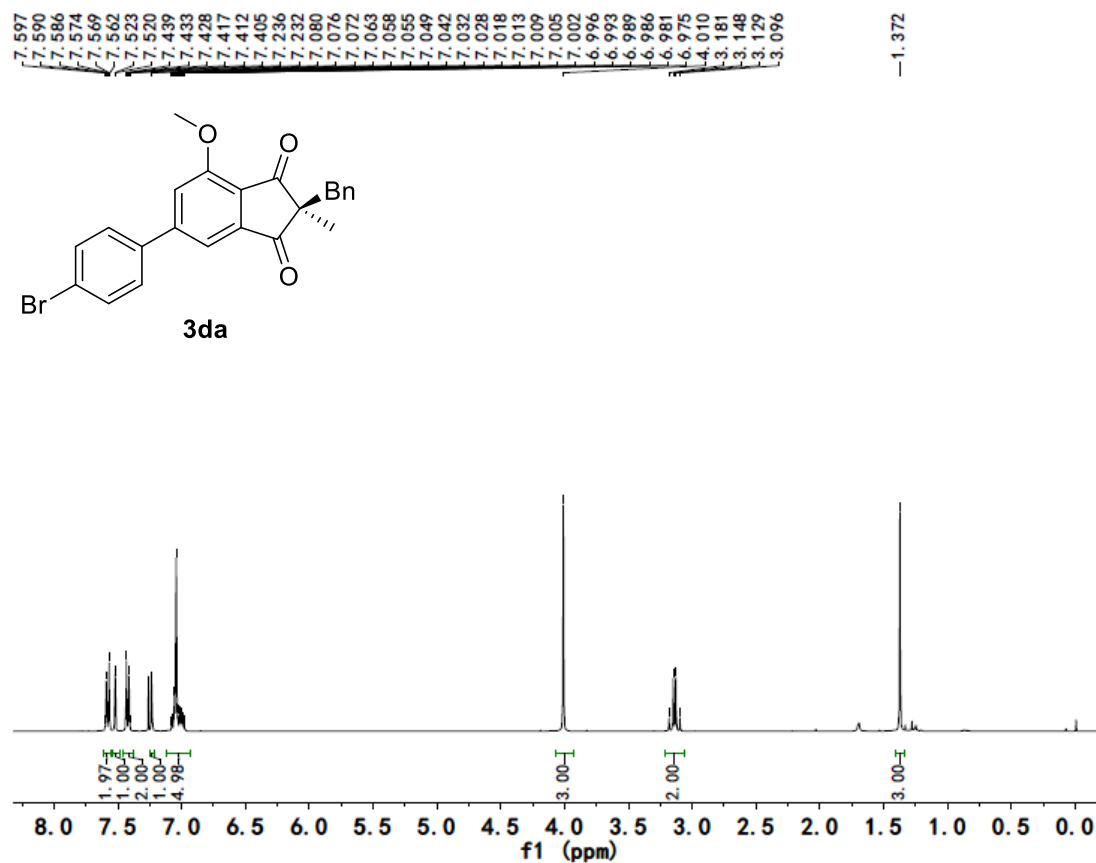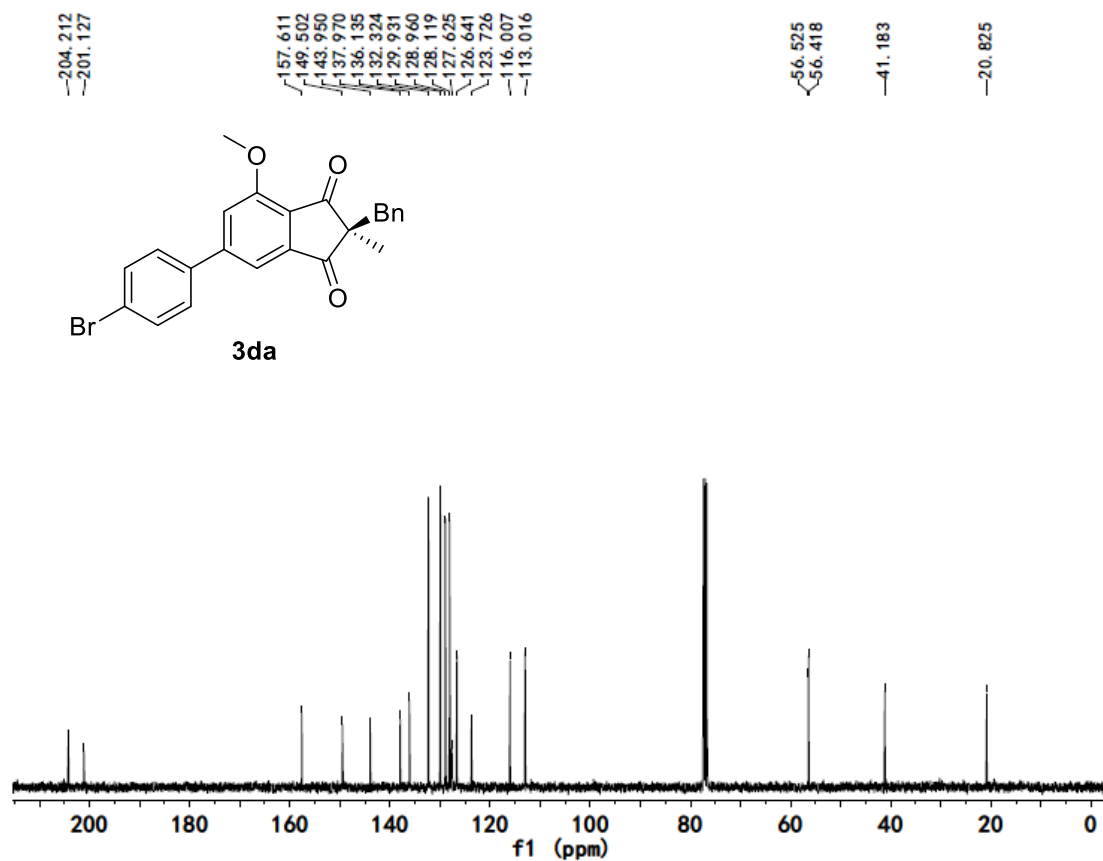

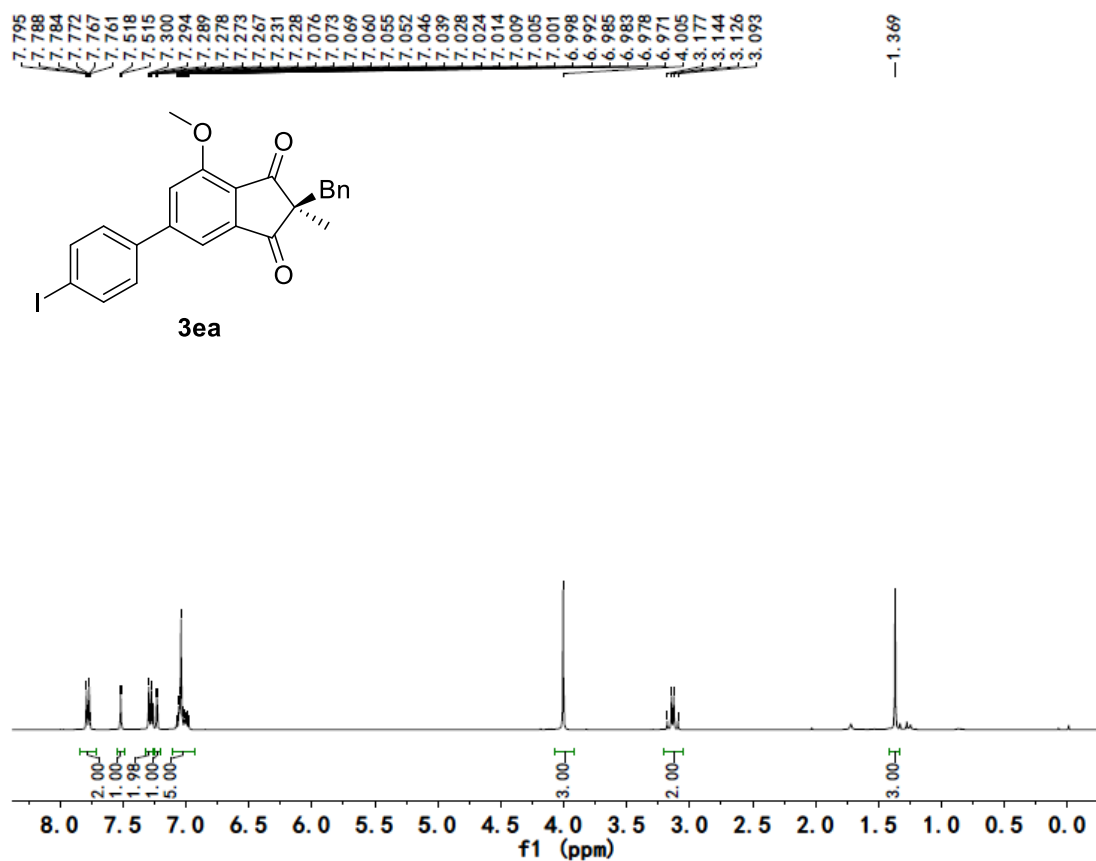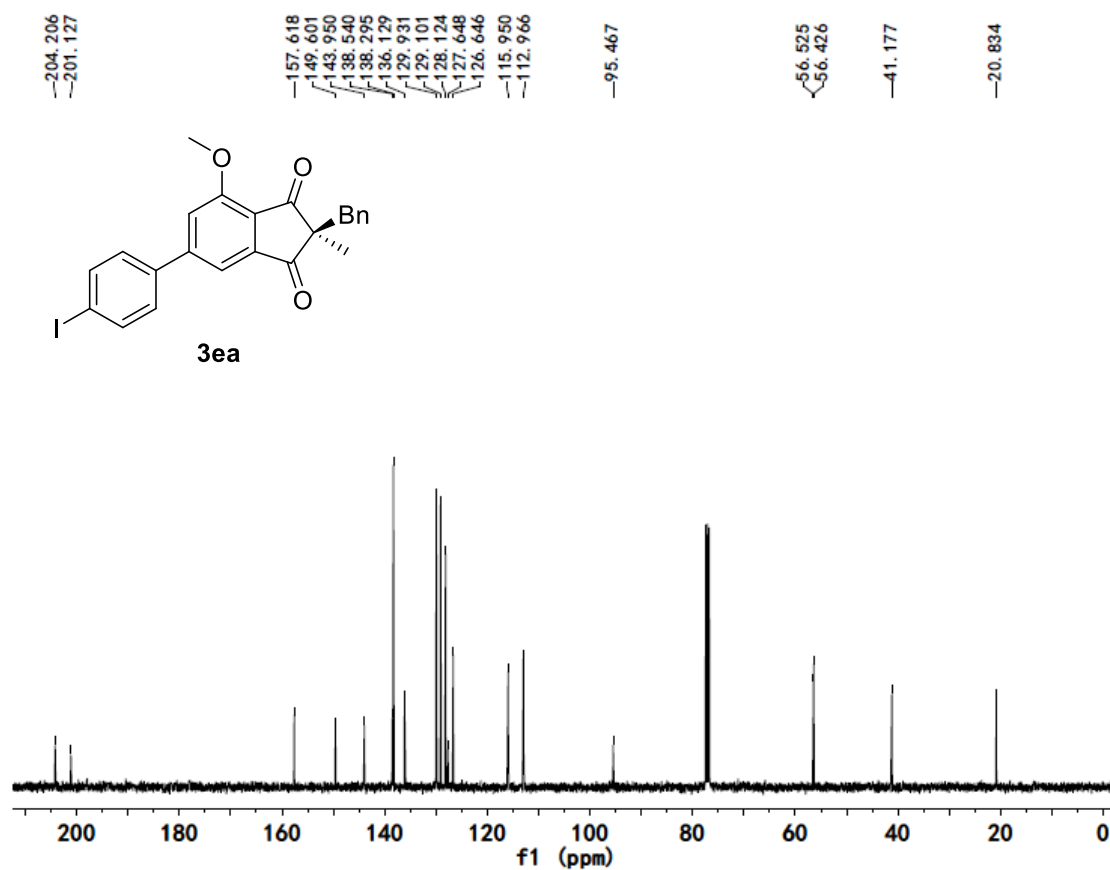

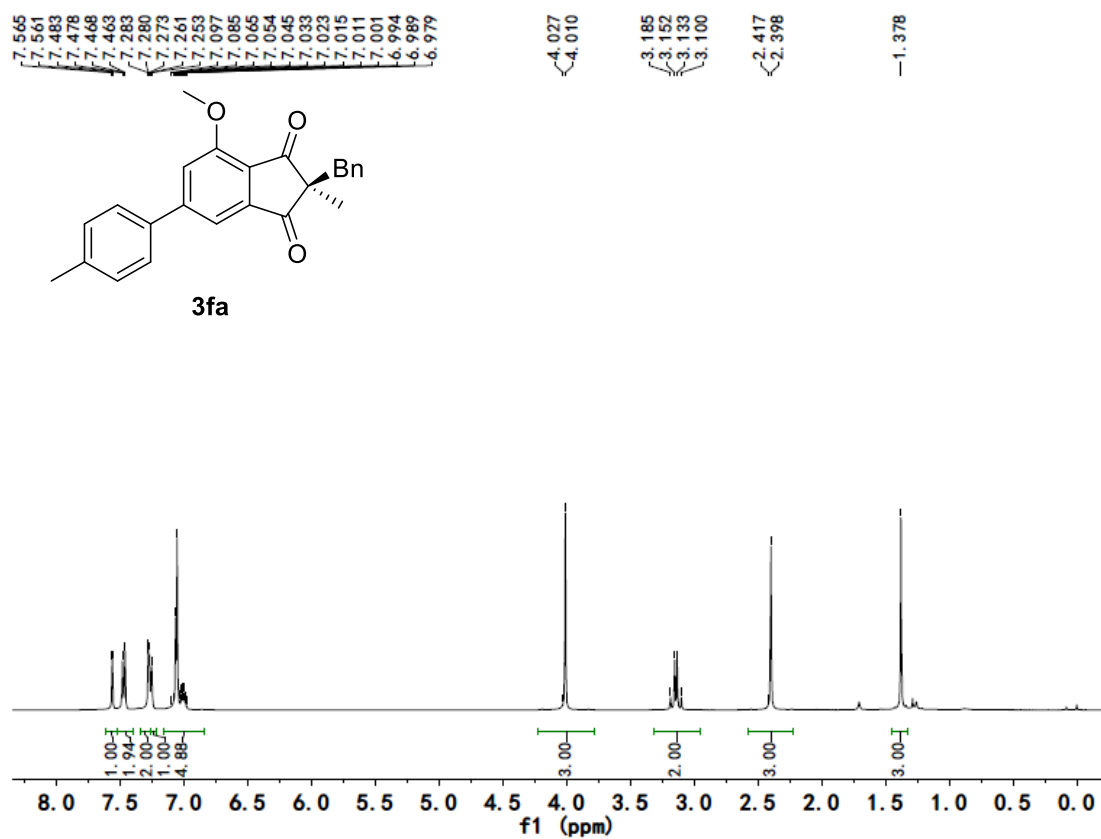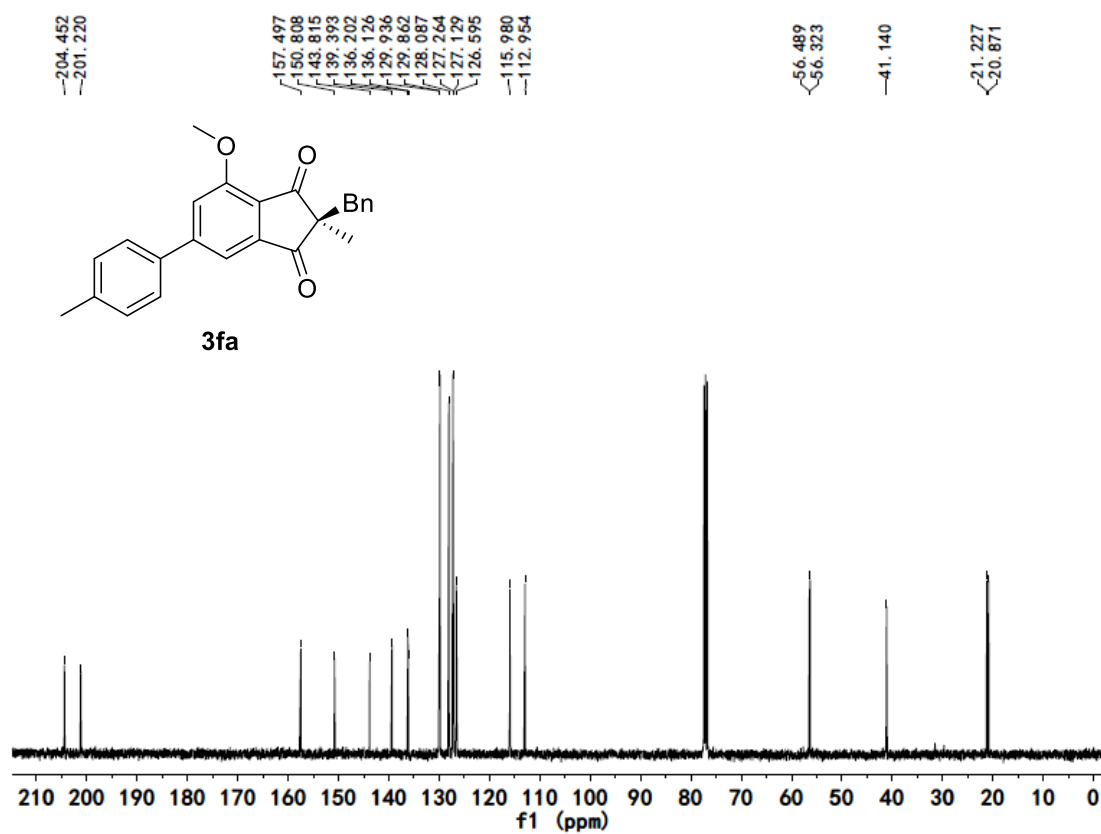

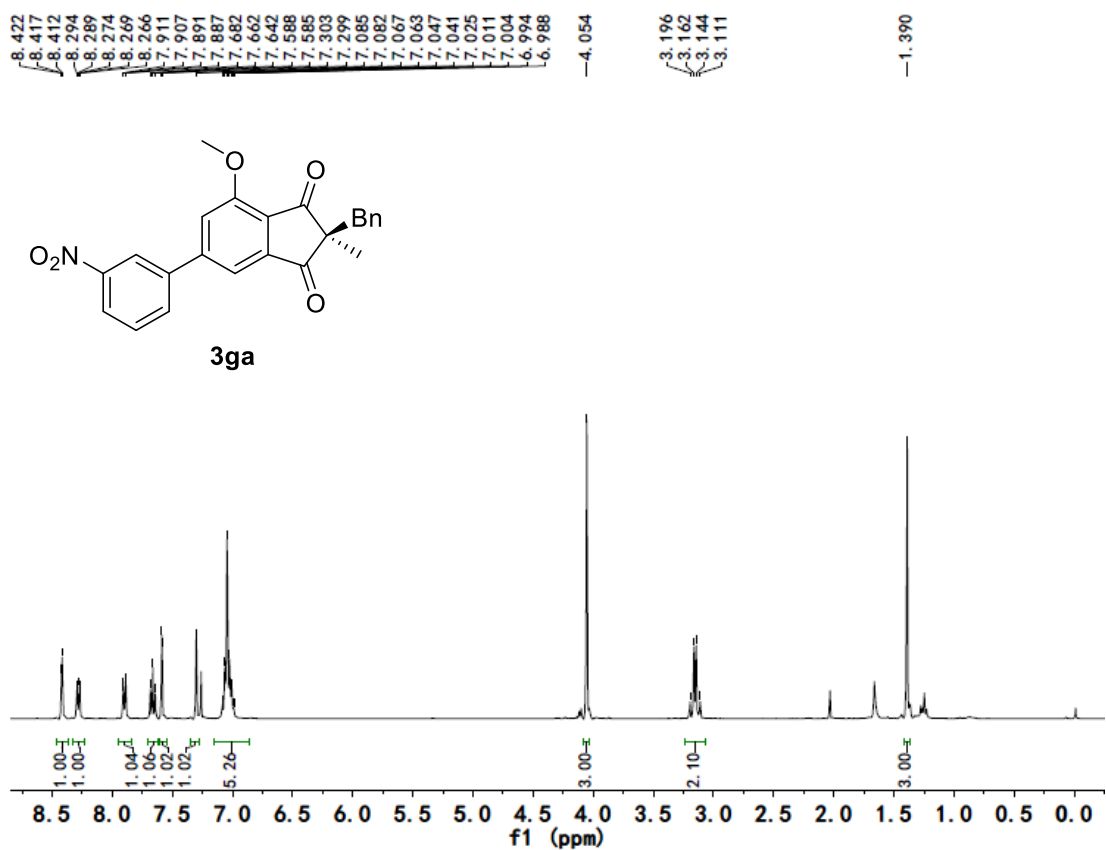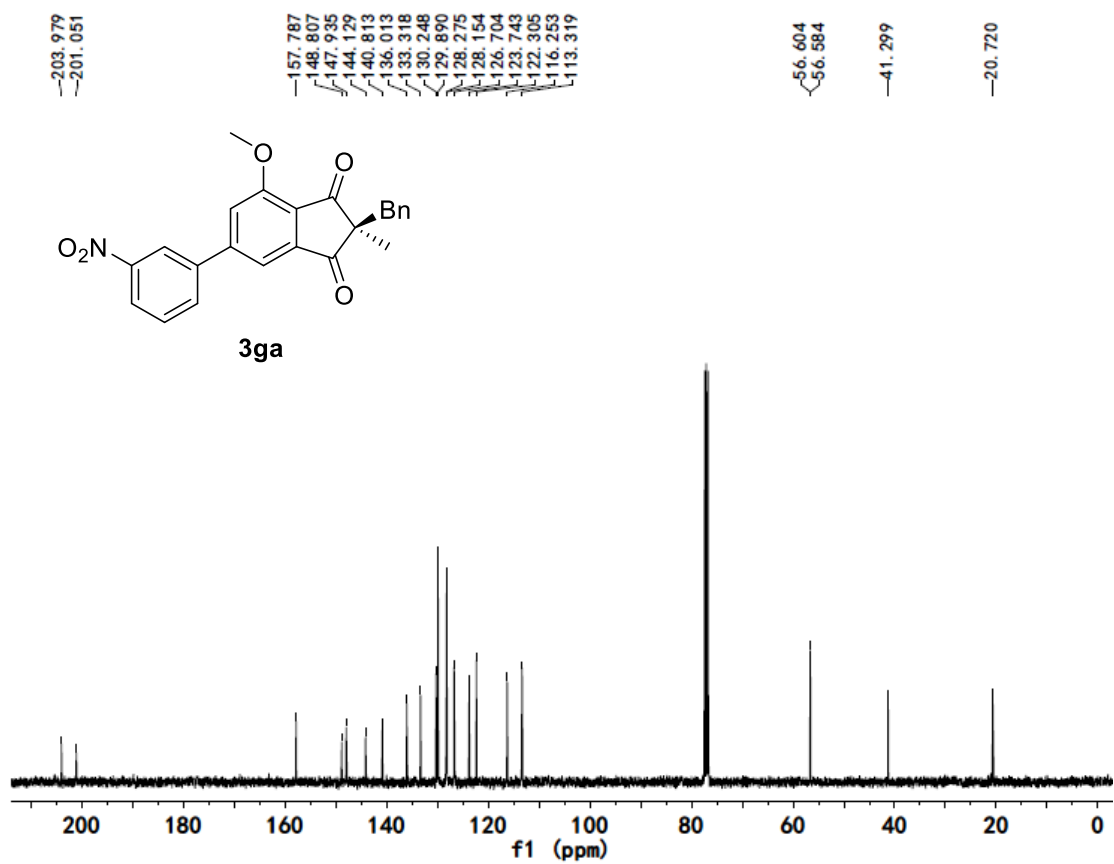

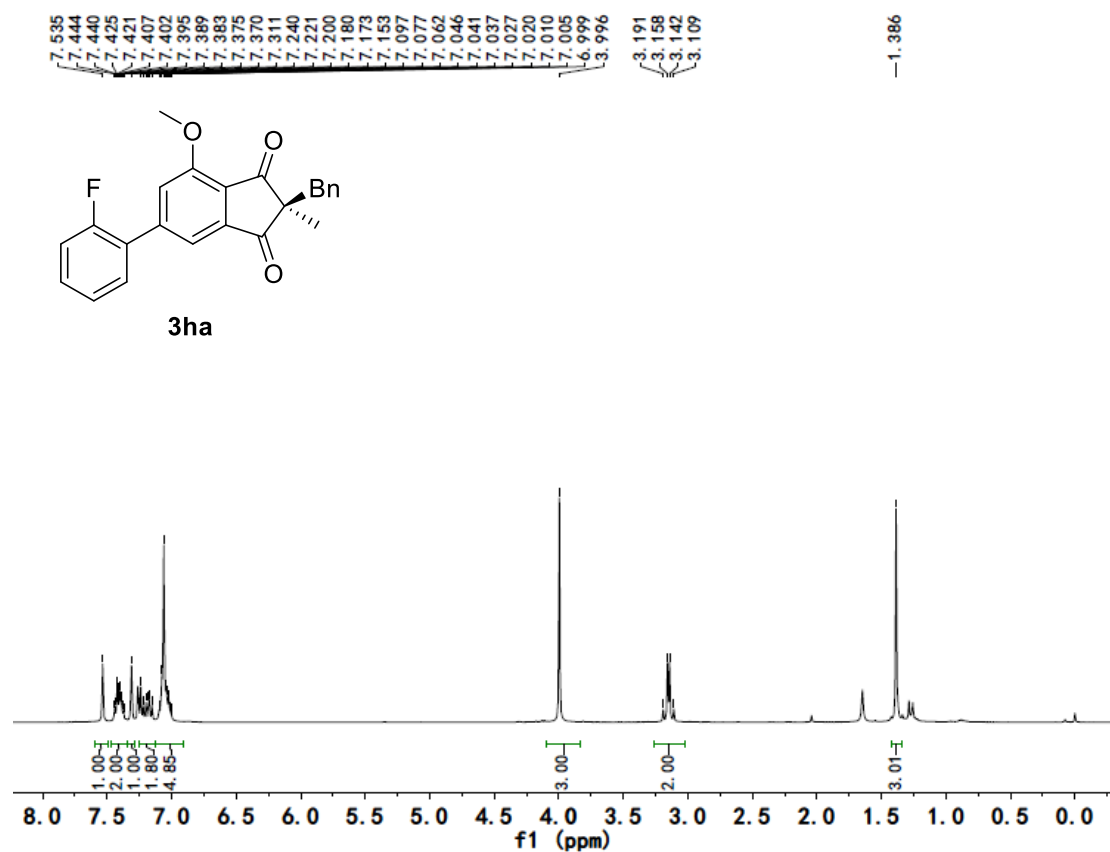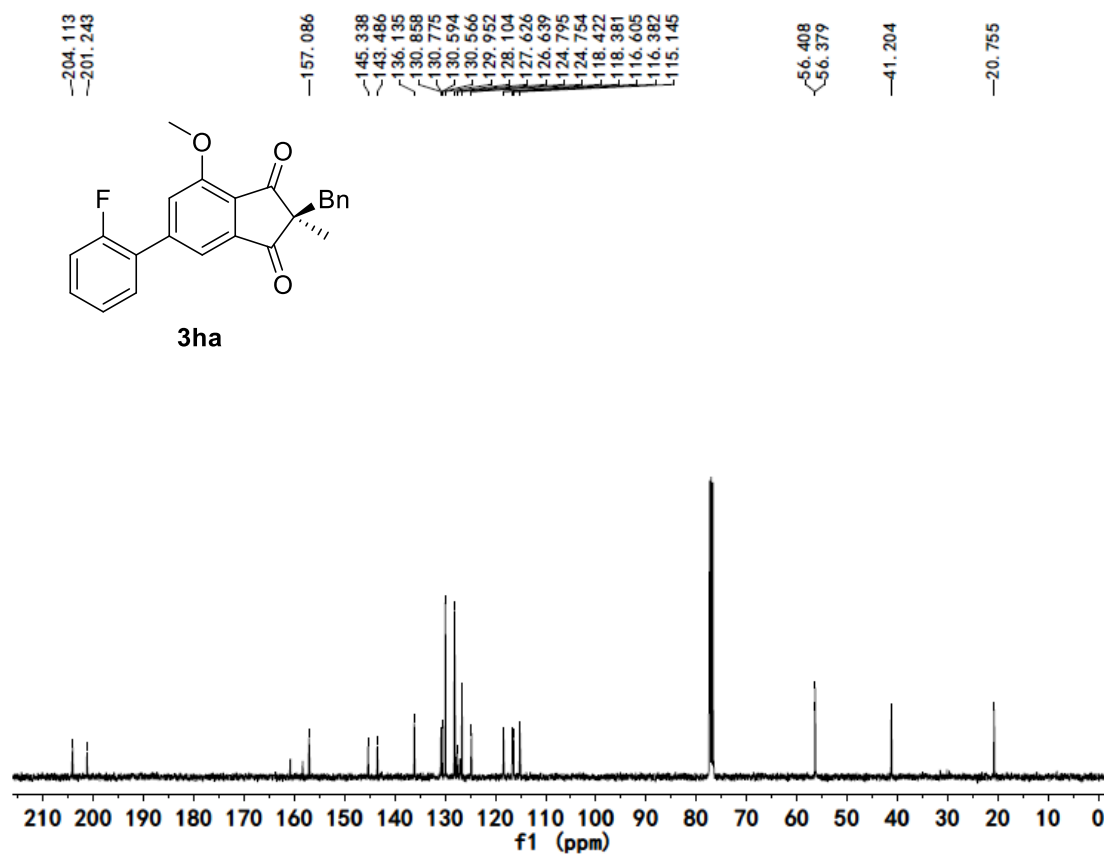



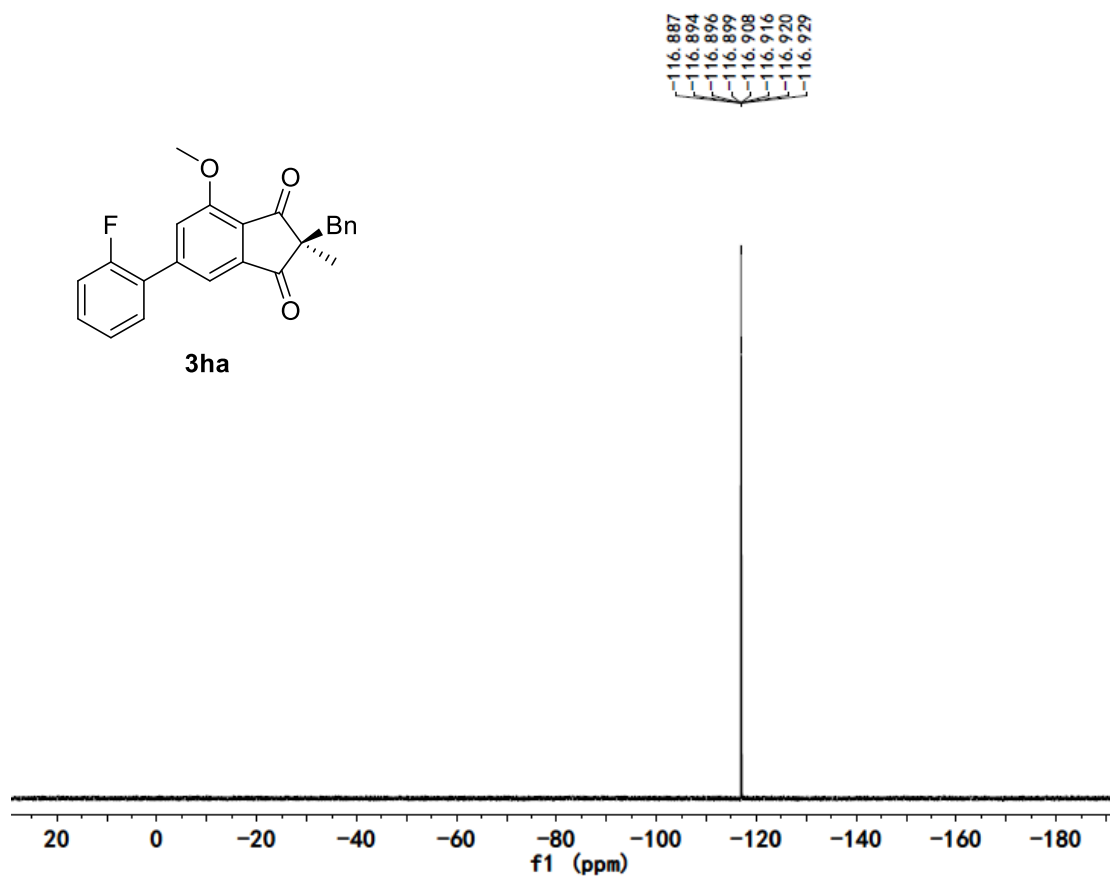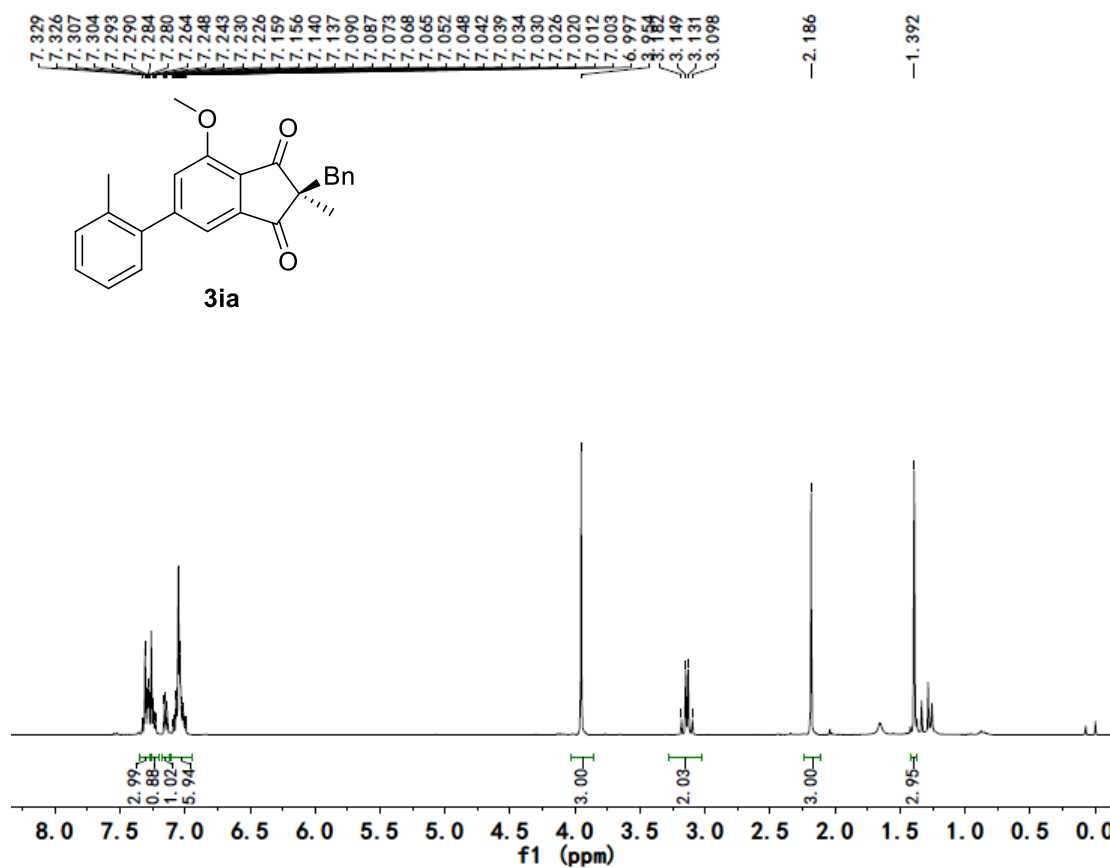

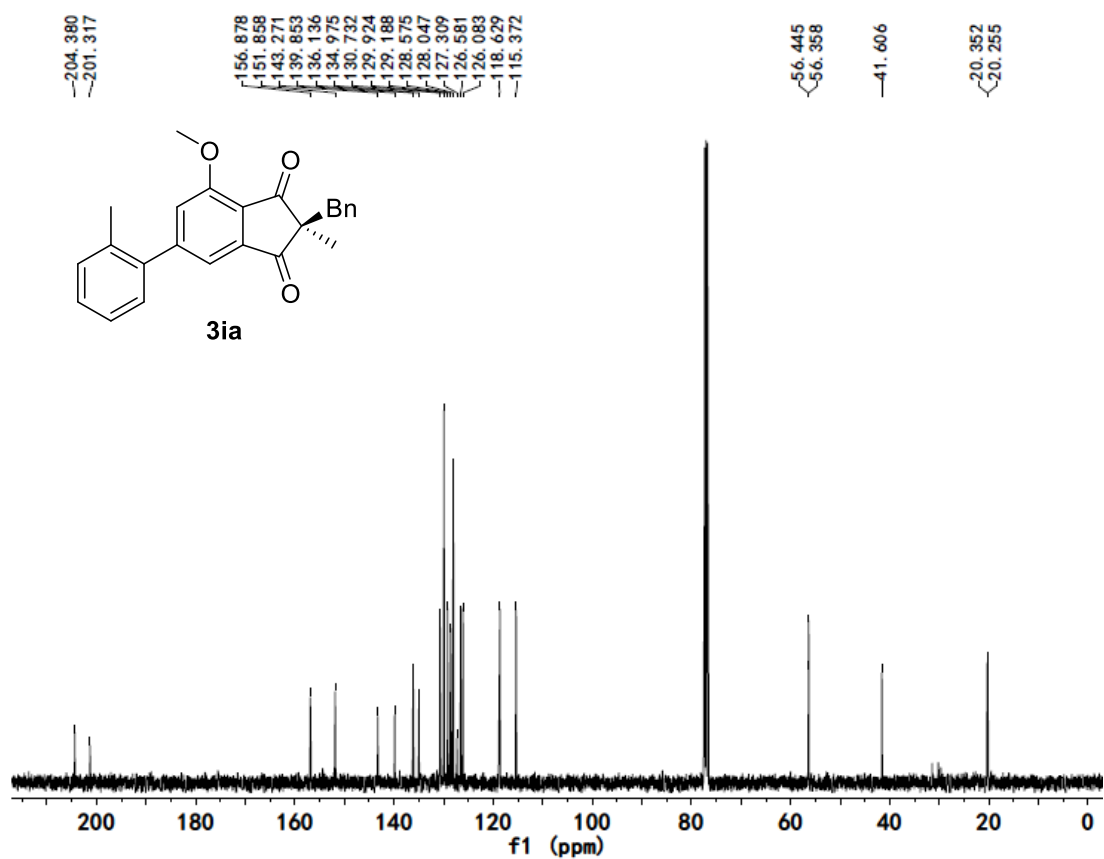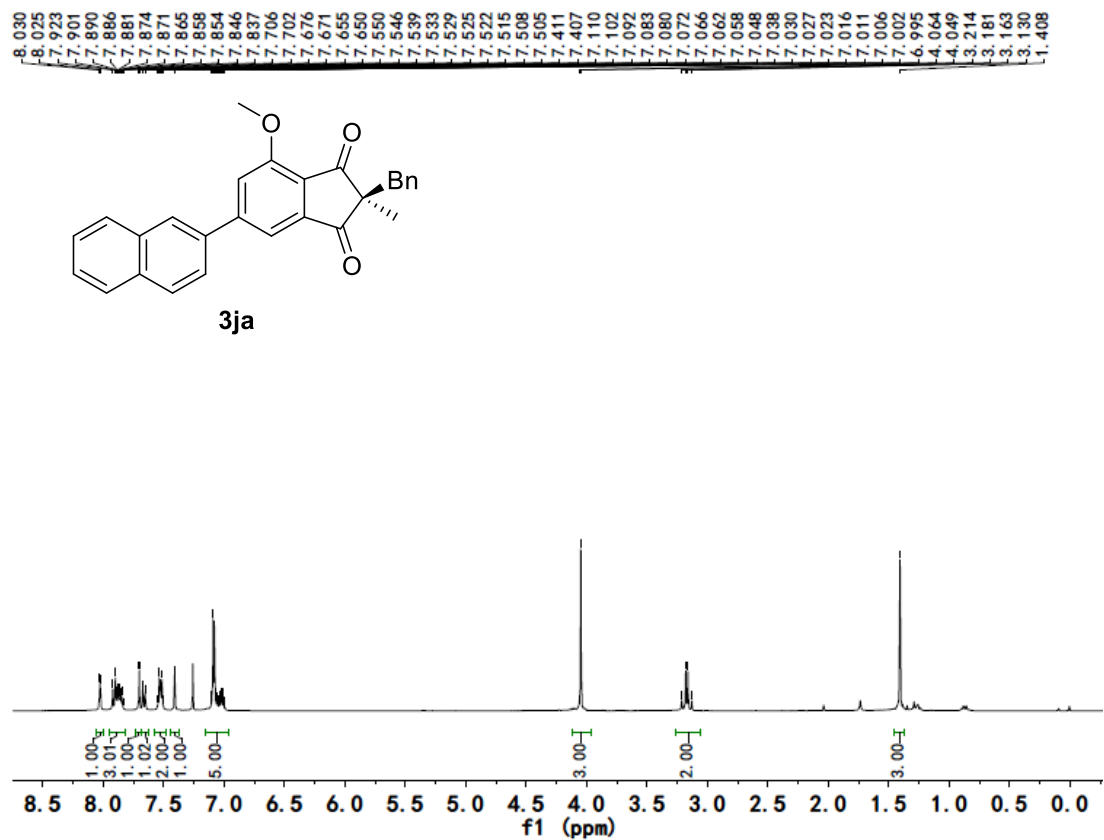

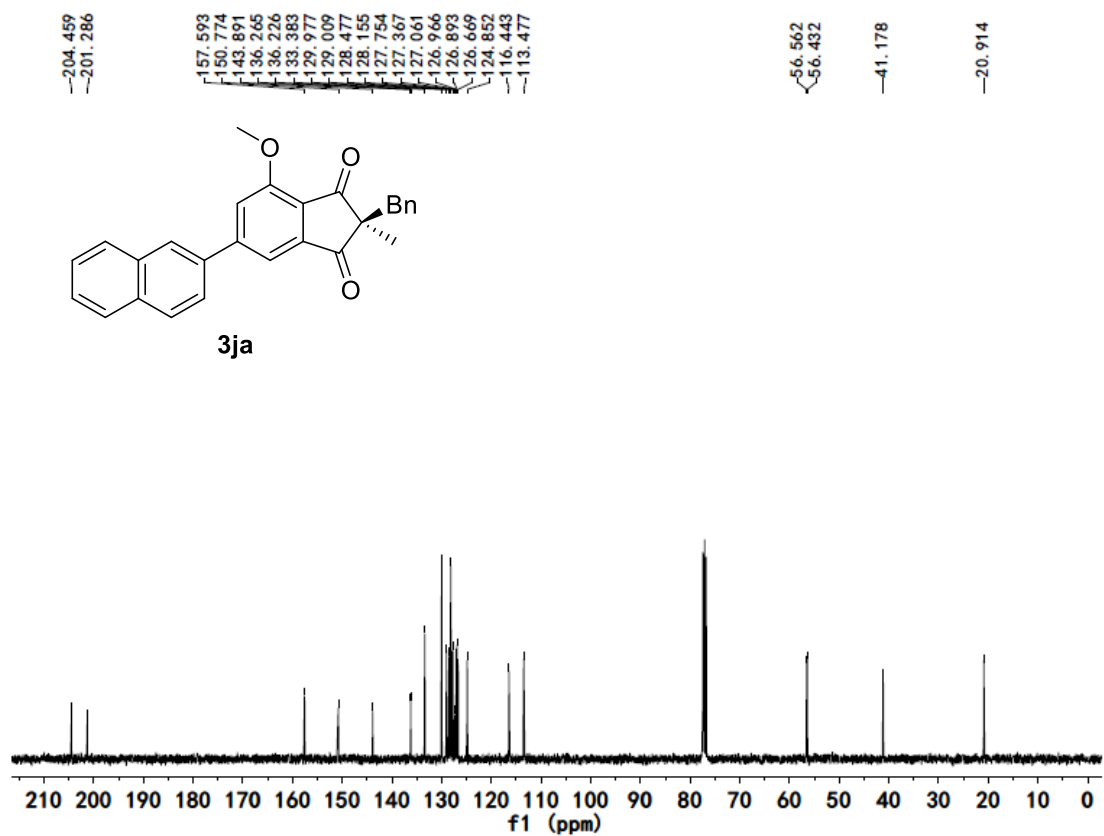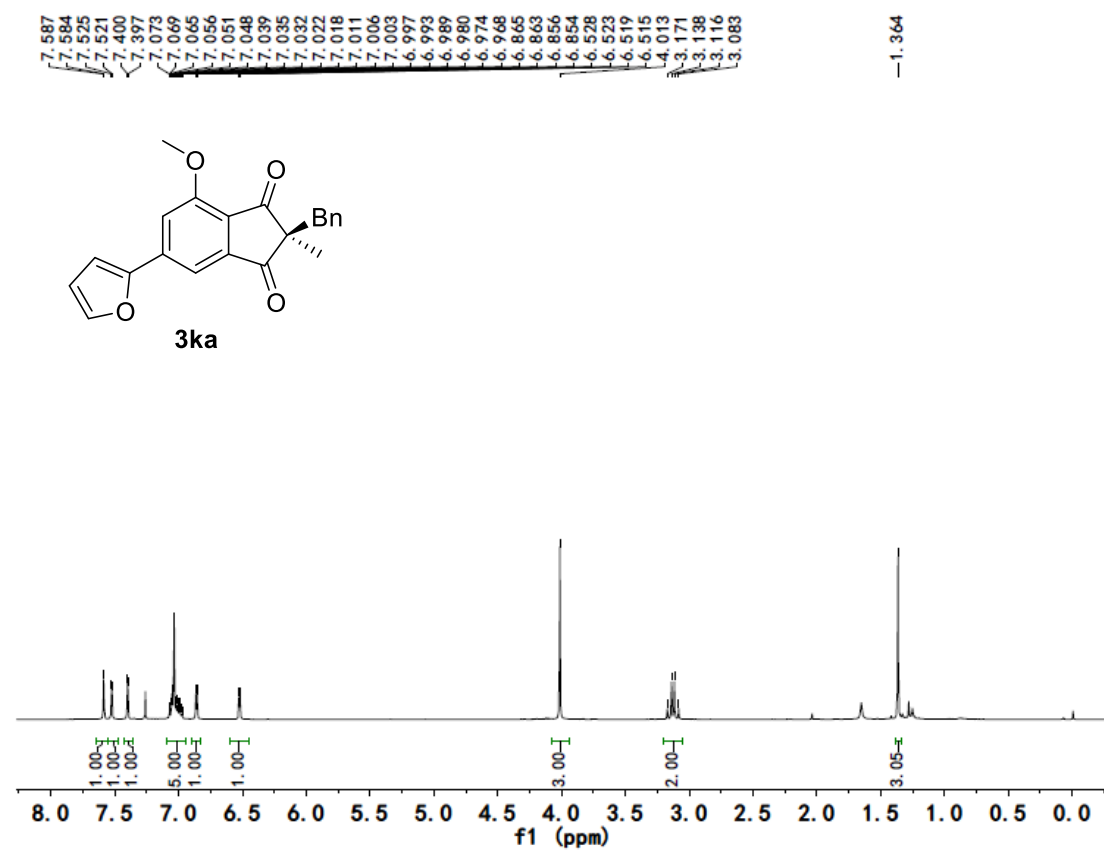

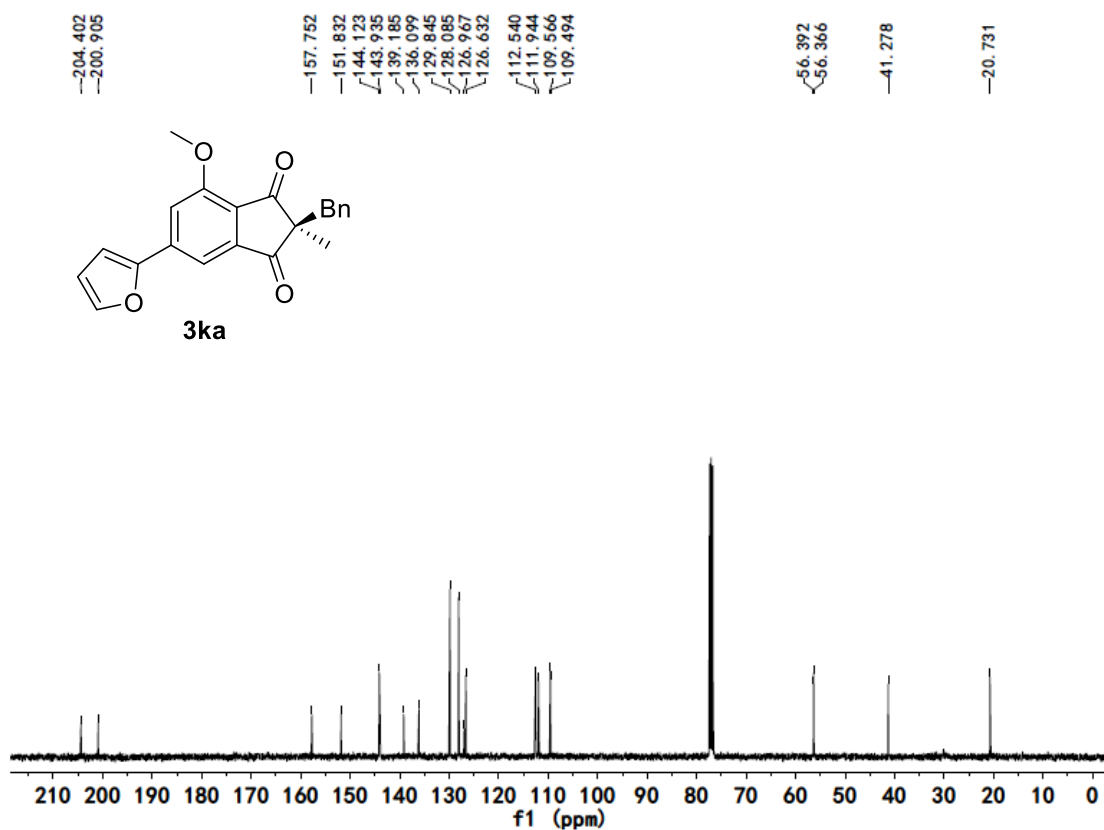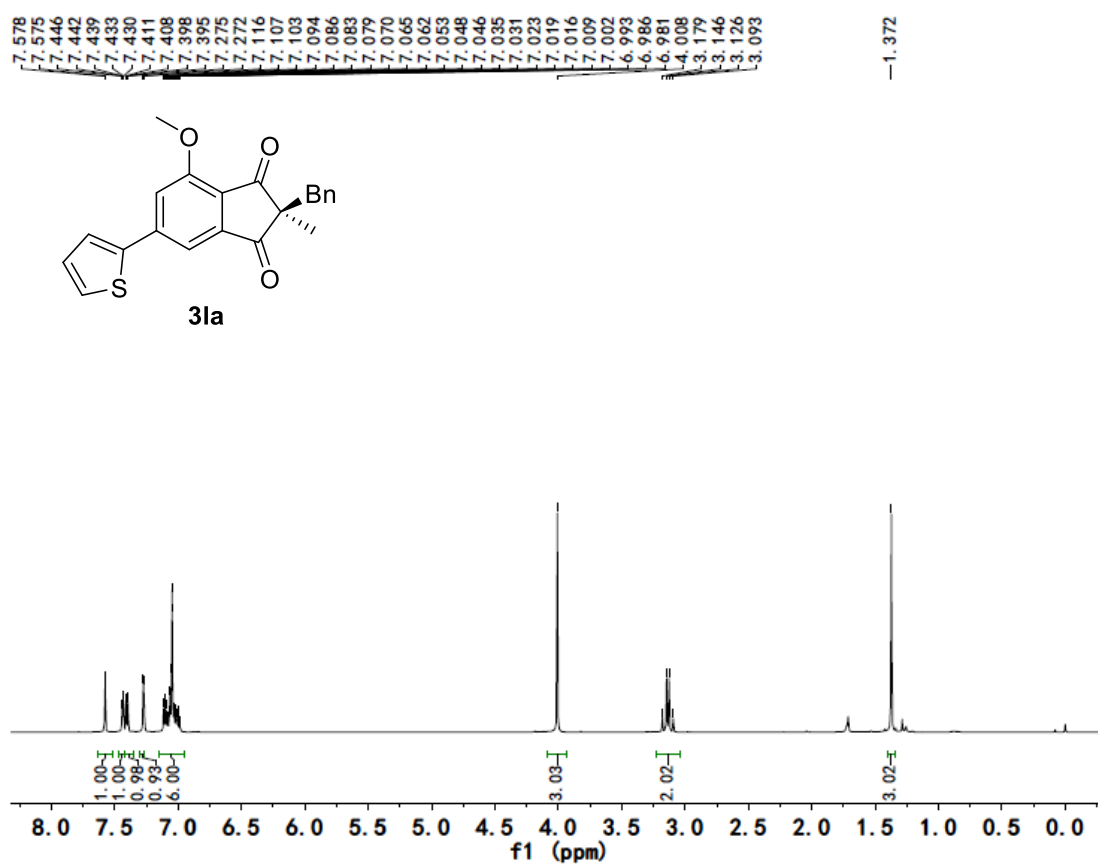

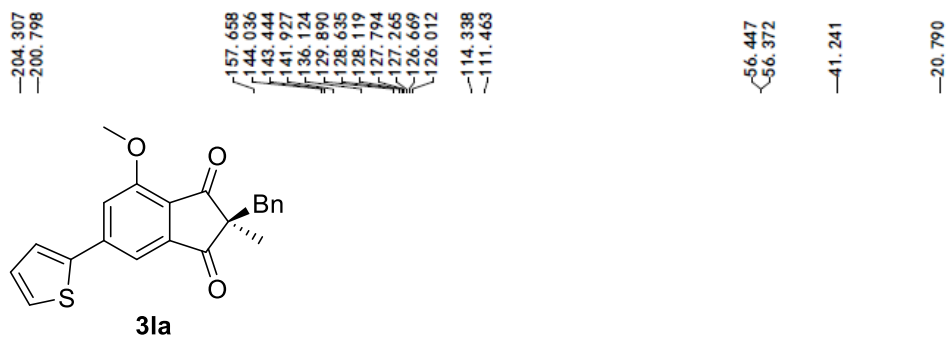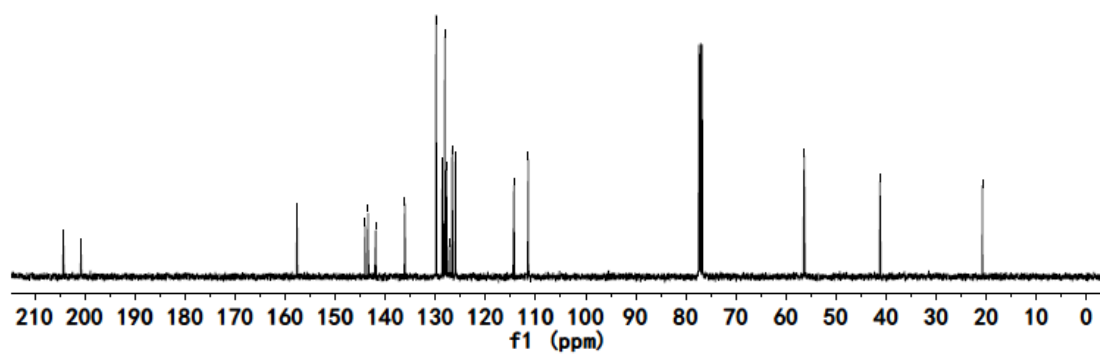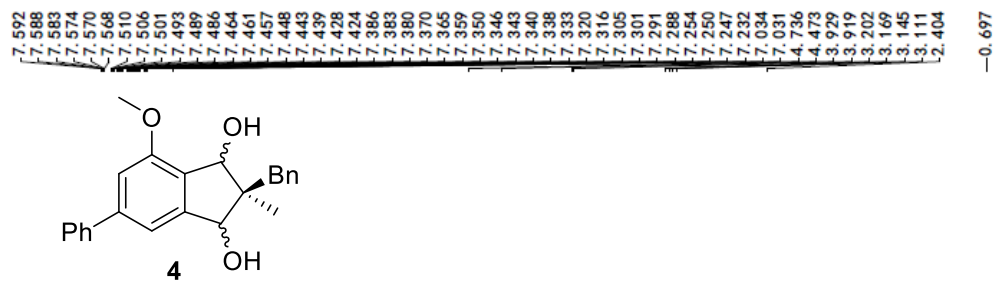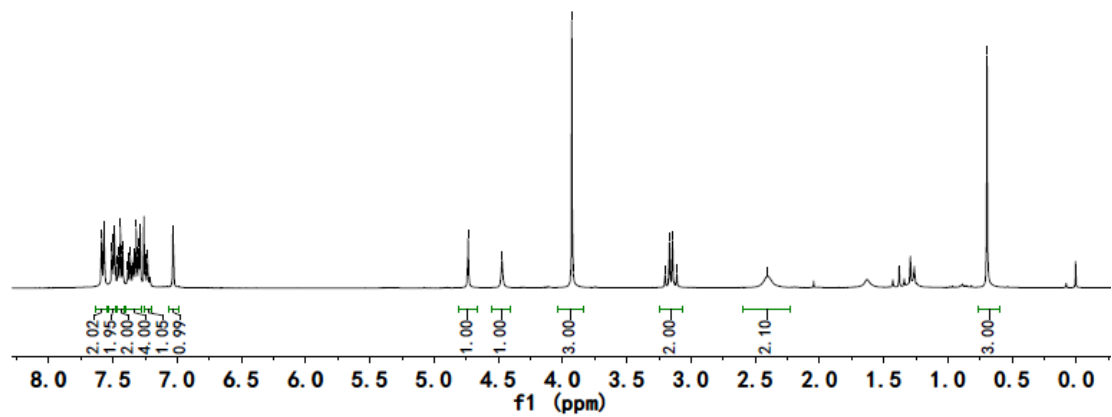

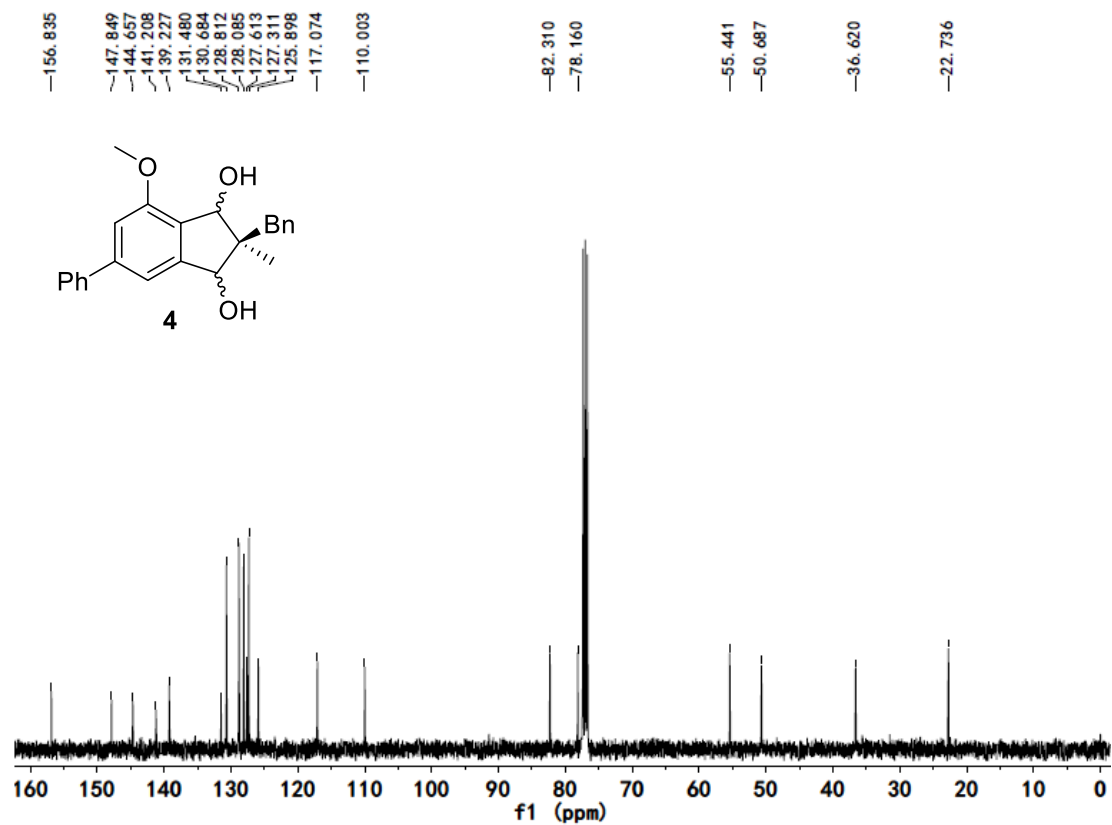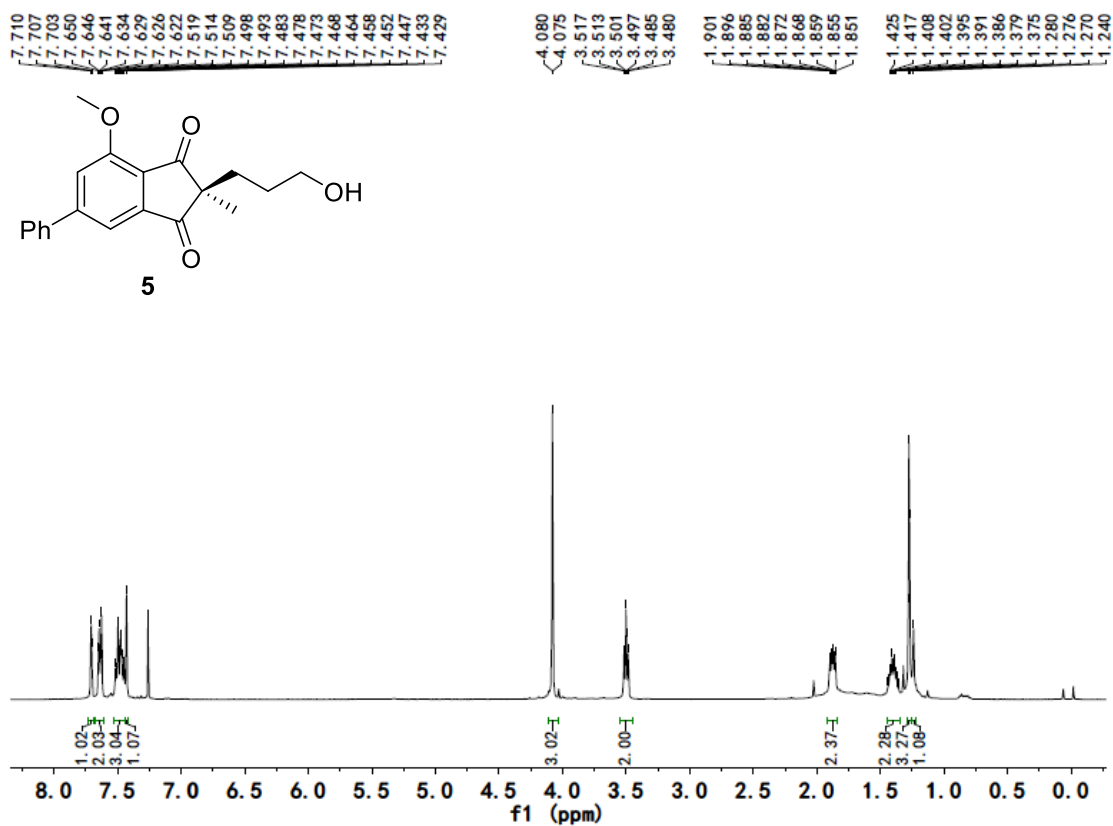

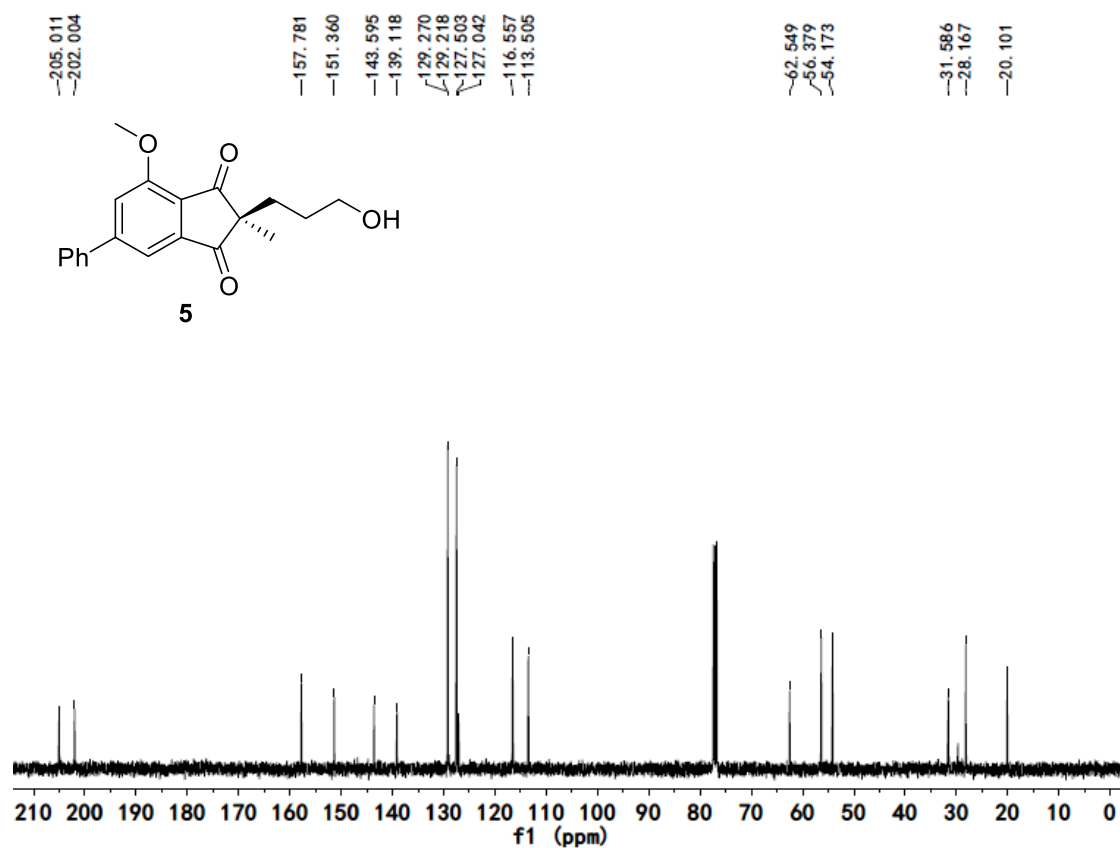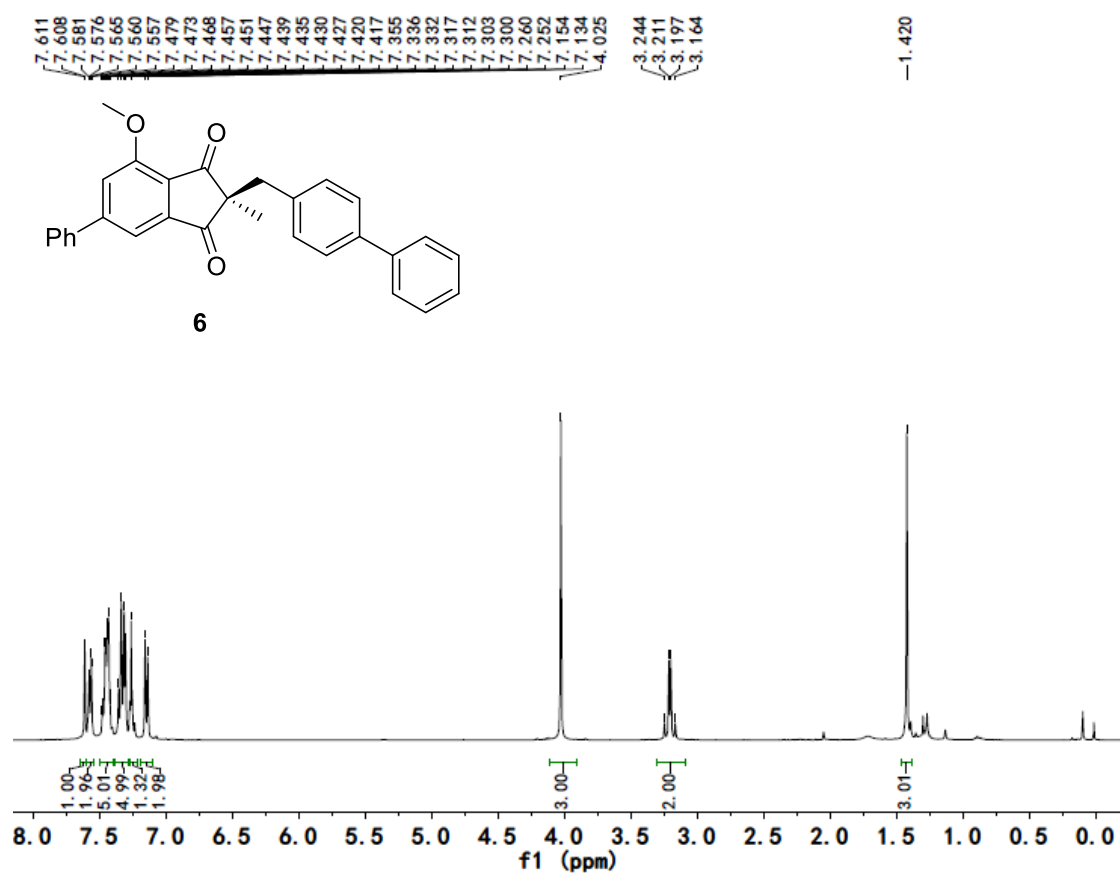

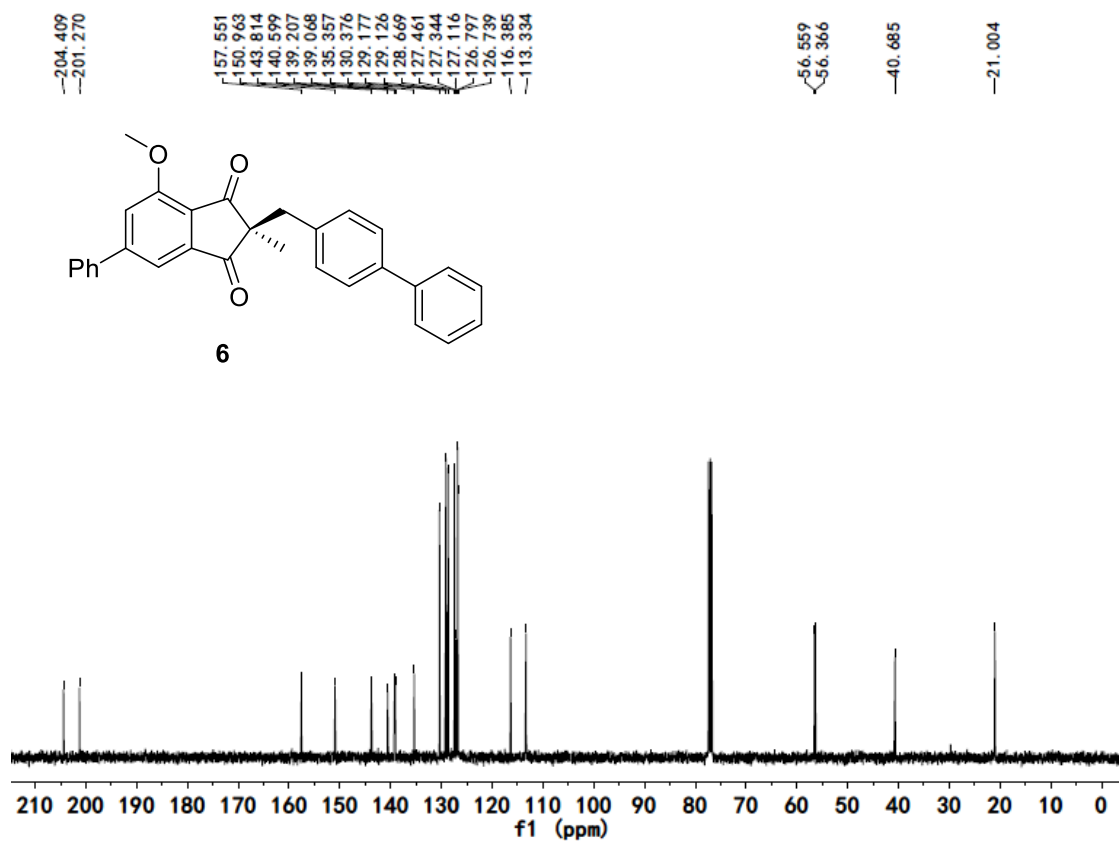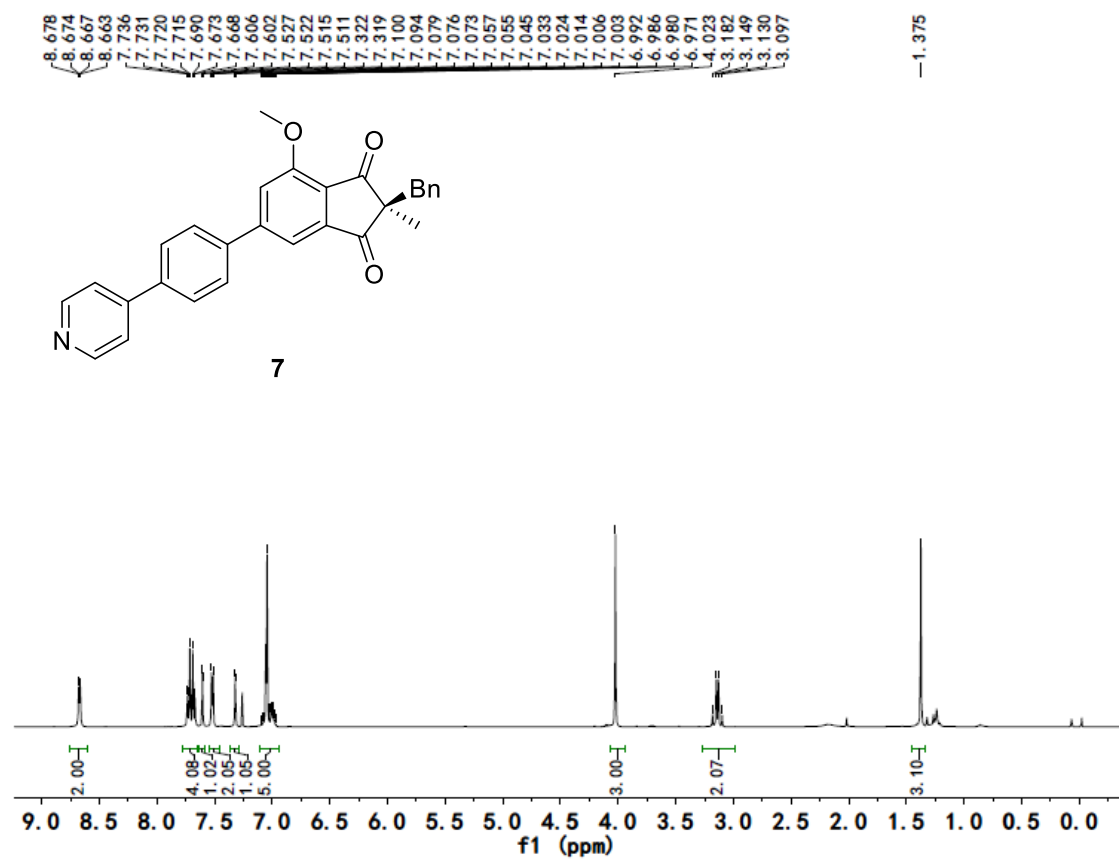



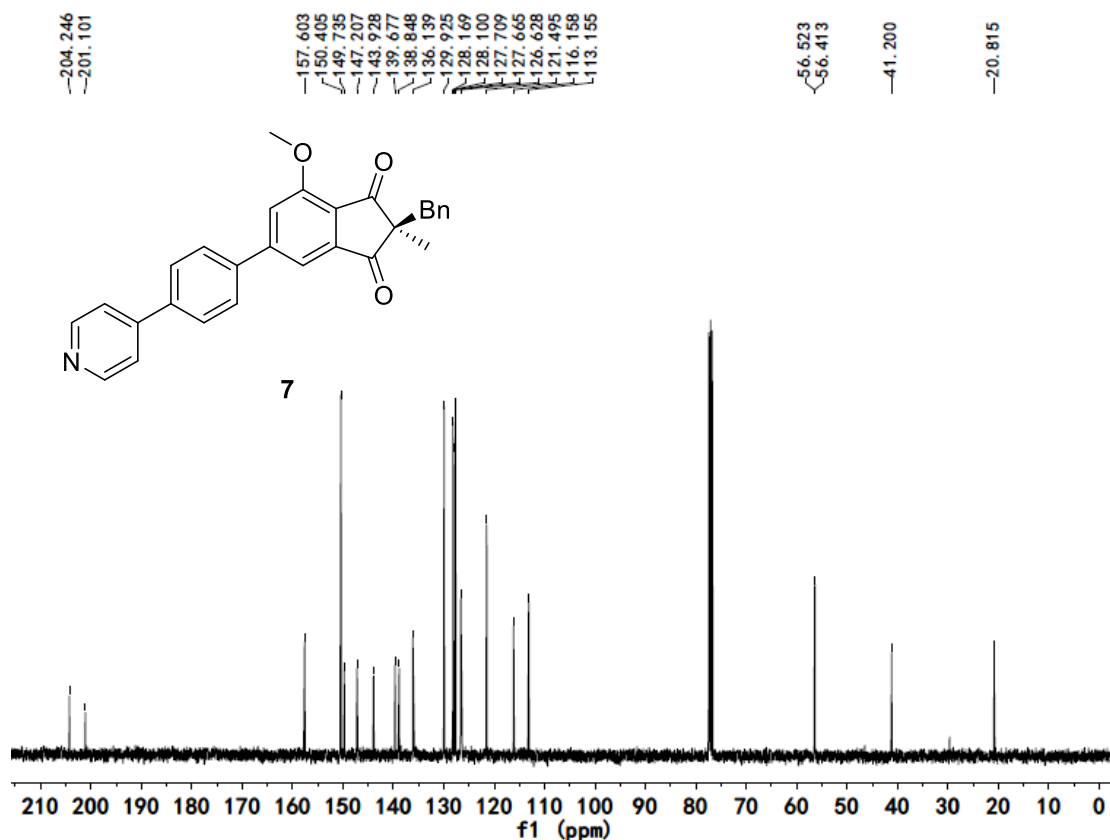

## VII: HPLC profile spectrum of compounds

### 3aa

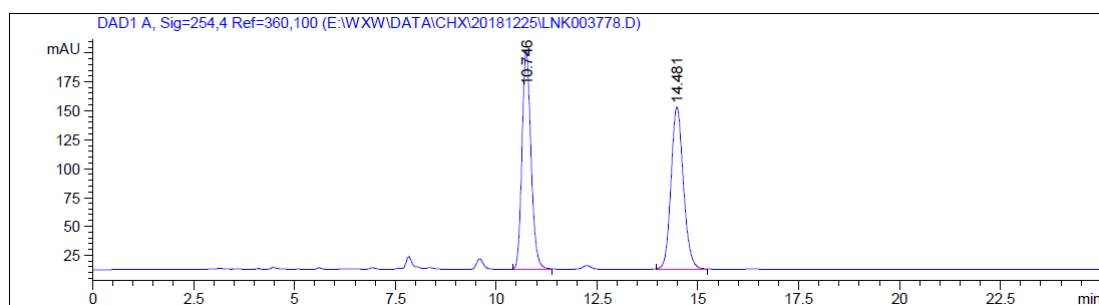

| Peak # | RetTime [min] | Type | Width [min] | Area [mAU*s] | Height [mAU] | Area %  |
|--------|---------------|------|-------------|--------------|--------------|---------|
| 1      | 10.746        | BB   | 0.2395      | 2943.81909   | 189.21471    | 49.4726 |
| 2      | 14.481        | BB   | 0.3276      | 3006.58789   | 140.52664    | 50.5274 |

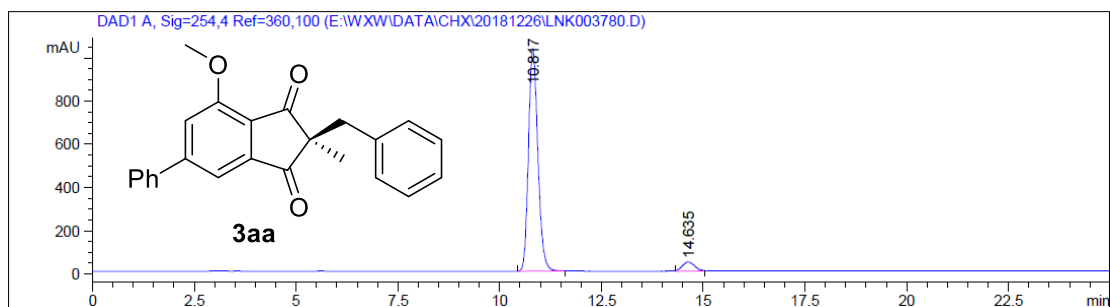

| Peak # | RetTime [min] | Type | Width [min] | Area [mAU*s] | Height [mAU] | Area %  |
|--------|---------------|------|-------------|--------------|--------------|---------|
| 1      | 10.817        | BB   | 0.2472      | 1.64734e4    | 1026.60278   | 95.0431 |
| 2      | 14.635        | MM R | 0.3447      | 859.15833    | 41.54665     | 4.9569  |

### 3ab

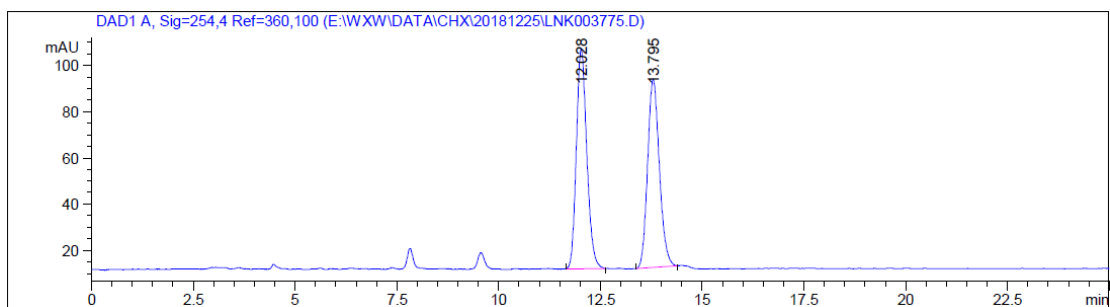

| Peak # | RetTime [min] | Type | Width [min] | Area [mAU*s] | Height [mAU] | Area %  |
|--------|---------------|------|-------------|--------------|--------------|---------|
| 1      | 12.028        | BB   | 0.2743      | 1699.27686   | 95.17080     | 51.0091 |
| 2      | 13.795        | BB   | 0.3098      | 1632.04639   | 81.44794     | 48.9909 |

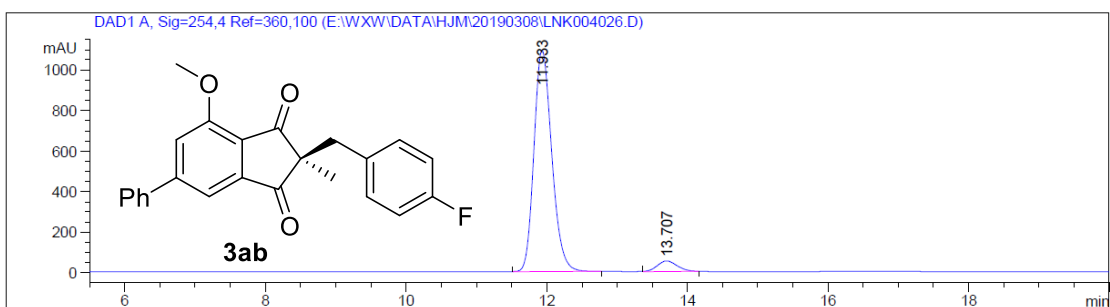

| Peak # | RetTime [min] | Type | Width [min] | Area [mAU*s] | Height [mAU] | Area %  |
|--------|---------------|------|-------------|--------------|--------------|---------|
| 1      | 11.933        | BB   | 0.2771      | 1.93844e4    | 1092.22046   | 95.0033 |
| 2      | 13.707        | MM R | 0.3255      | 1019.52667   | 52.19908     | 4.9967  |

### 3ac

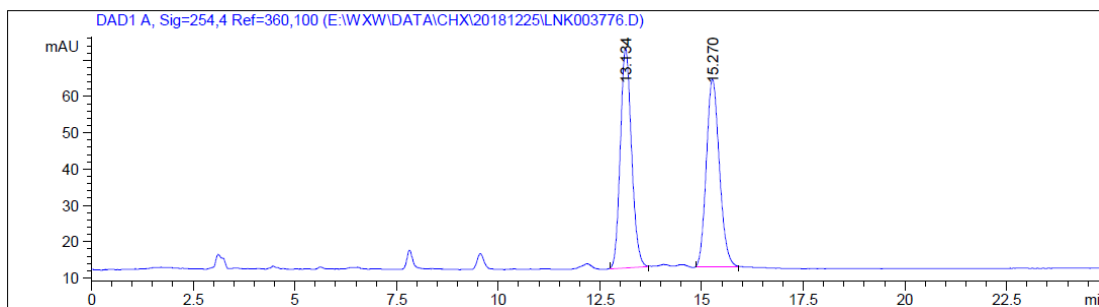

| Peak # | RetTime [min] | Type | Width [min] | Area [mAU*s] | Height [mAU] | Area %  |
|--------|---------------|------|-------------|--------------|--------------|---------|
| 1      | 13.134        | BB   | 0.2960      | 1163.38098   | 60.58612     | 50.1363 |
| 2      | 15.270        | BB   | 0.3446      | 1157.05432   | 51.79548     | 49.8637 |

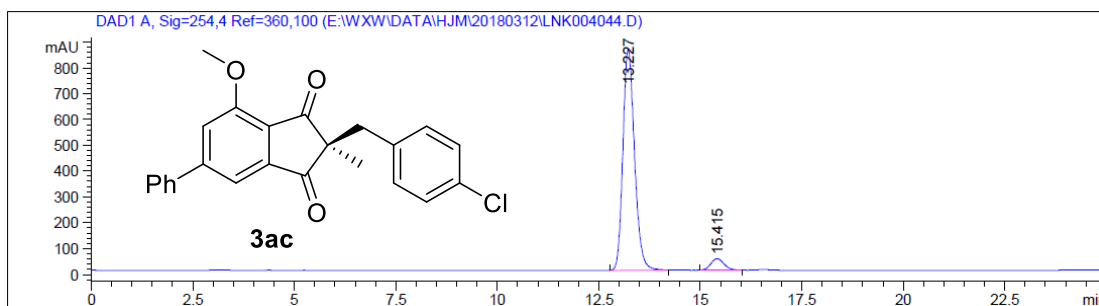

| Peak # | RetTime [min] | Type | Width [min] | Area [mAU*s] | Height [mAU] | Area %  |
|--------|---------------|------|-------------|--------------|--------------|---------|
| 1      | 13.227        | BB   | 0.3079      | 1.70193e4    | 856.28125    | 94.5250 |
| 2      | 15.415        | MM R | 0.3709      | 985.78345    | 44.29782     | 5.4750  |

### 3ad

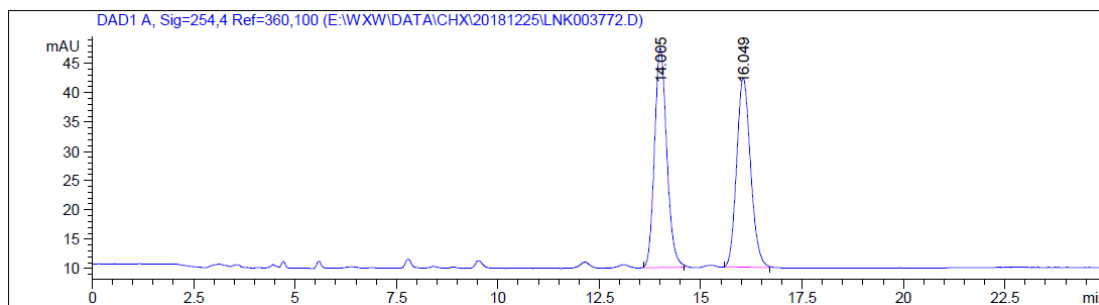

| Peak # | RetTime [min] | Type | Width [min] | Area [mAU*s] | Height [mAU] | Area %  |
|--------|---------------|------|-------------|--------------|--------------|---------|
| 1      | 14.005        | BB   | 0.3231      | 787.09344    | 37.46355     | 50.5514 |
| 2      | 16.049        | BB   | 0.3684      | 769.92291    | 32.26977     | 49.4486 |

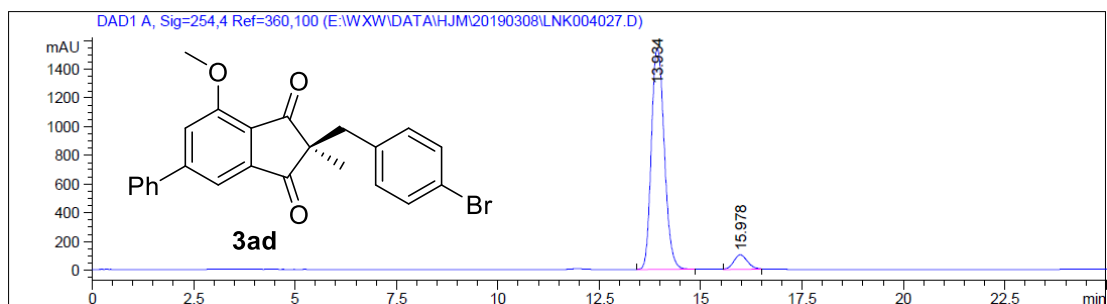

| Peak # | RetTime [min] | Type | Width [min] | Area [mAU*s] | Height [mAU] | Area %  |
|--------|---------------|------|-------------|--------------|--------------|---------|
| 1      | 13.934        | BB   | 0.3498      | 3.42056e4    | 1536.19019   | 93.5507 |
| 2      | 15.978        | MM R | 0.3891      | 2358.09790   | 101.00124    | 6.4493  |

### 3ae

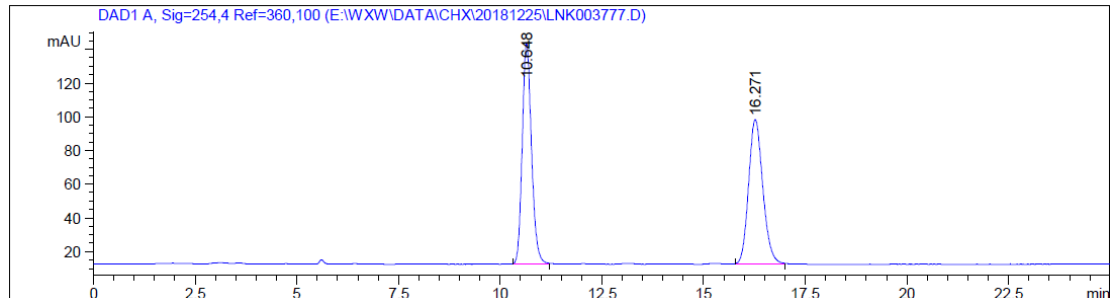

| Peak # | RetTime [min] | Type | Width [min] | Area [mAU*s] | Height [mAU] | Area %  |
|--------|---------------|------|-------------|--------------|--------------|---------|
| 1      | 10.648        | BB   | 0.2428      | 2077.24268   | 131.12067    | 49.8936 |
| 2      | 16.271        | BB   | 0.3758      | 2086.10425   | 85.76928     | 50.1064 |

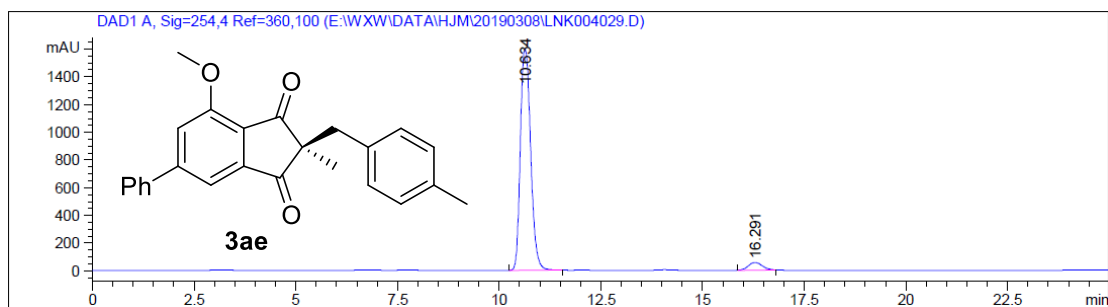

### 3af

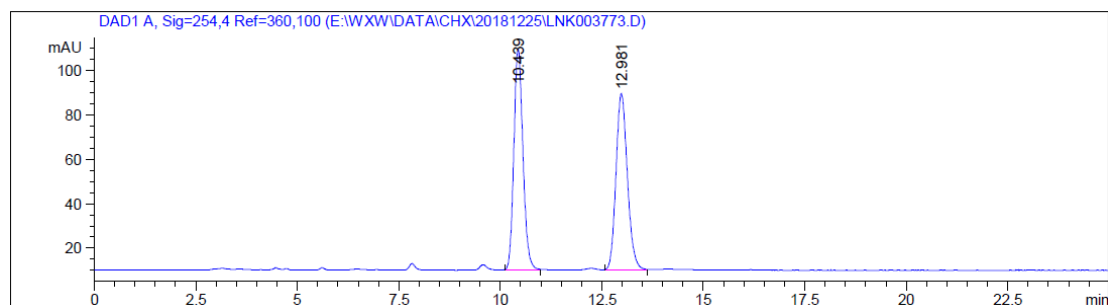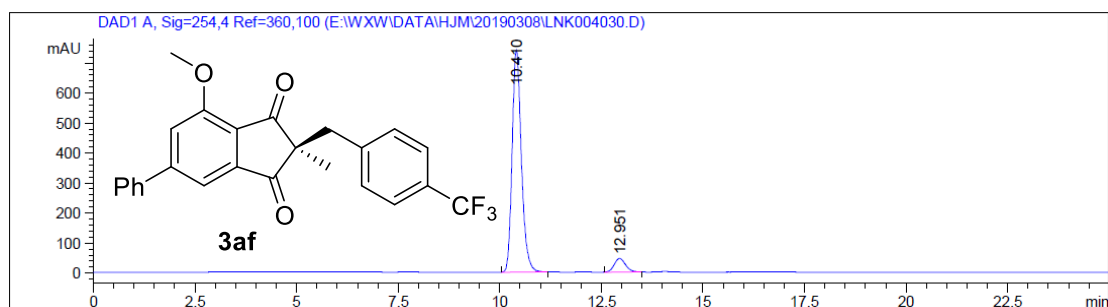

| Peak # | RetTime [min] | Type | Width [min] | Area [mAU*s] | Height [mAU] | Area %  |
|--------|---------------|------|-------------|--------------|--------------|---------|
| 1      | 10.410        | BB   | 0.2430      | 1.17190e4    | 739.07532    | 93.0110 |
| 2      | 12.951        | BB   | 0.2995      | 880.58612    | 45.56285     | 6.9890  |

### 3ag

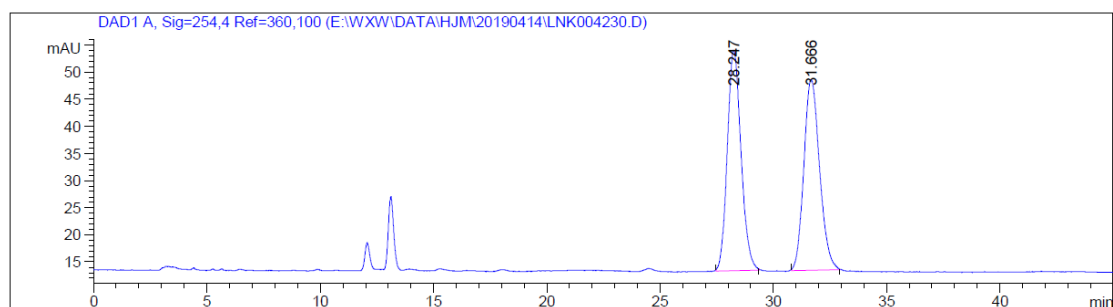

| Peak # | RetTime [min] | Type | Width [min] | Area [mAU*s] | Height [mAU] | Area %  |
|--------|---------------|------|-------------|--------------|--------------|---------|
| 1      | 28.247        | BB   | 0.6350      | 1709.41589   | 40.61483     | 50.1819 |
| 2      | 31.666        | BB   | 0.7188      | 1697.02380   | 35.17855     | 49.8181 |

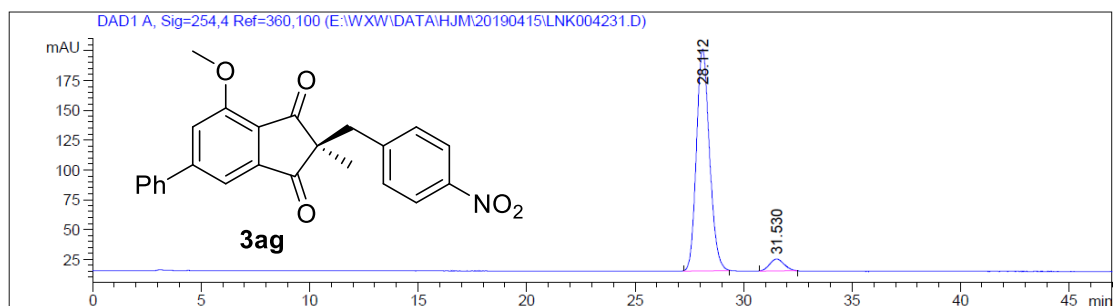

| Peak # | RetTime [min] | Type | Width [min] | Area [mAU*s] | Height [mAU] | Area %  |
|--------|---------------|------|-------------|--------------|--------------|---------|
| 1      | 28.112        | BB   | 0.6457      | 7792.57324   | 185.65417    | 94.5338 |
| 2      | 31.530        | MM R | 0.7622      | 450.58704    | 9.85304      | 5.4662  |

### 3ah

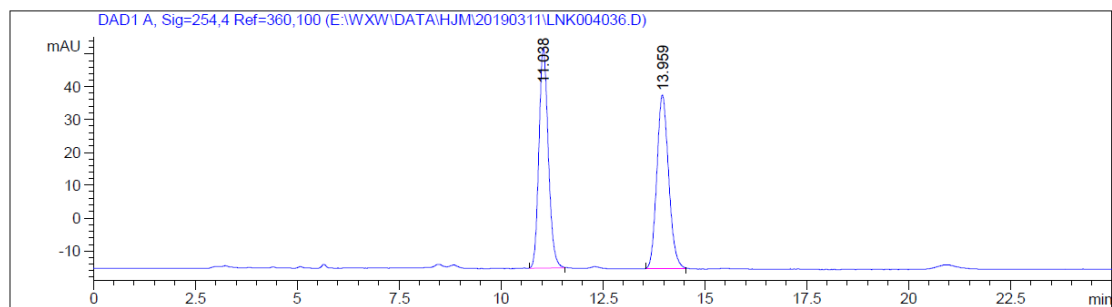

| Peak # | RetTime [min] | Type | Width [min] | Area [mAU*s] | Height [mAU] | Area %  |
|--------|---------------|------|-------------|--------------|--------------|---------|
| 1      | 11.038        | BB   | 0.2463      | 1068.06238   | 66.88206     | 49.9548 |
| 2      | 13.959        | BB   | 0.3142      | 1069.99707   | 52.85118     | 50.0452 |

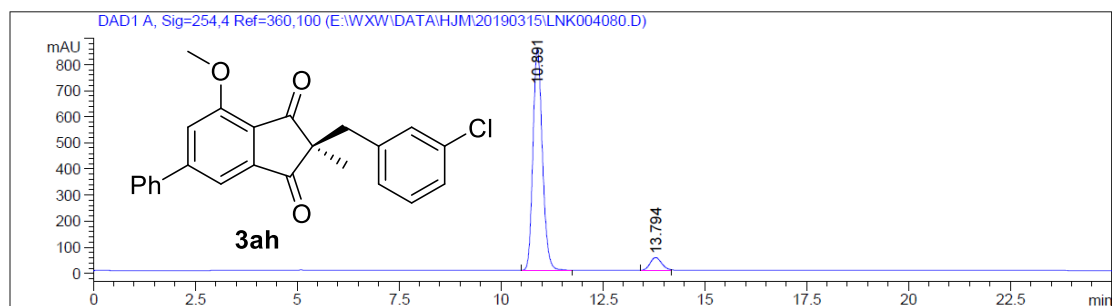

| Peak # | RetTime [min] | Type | Width [min] | Area [mAU*s] | Height [mAU] | Area %  |
|--------|---------------|------|-------------|--------------|--------------|---------|
| 1      | 10.891        | BB   | 0.2508      | 1.37193e4    | 847.78931    | 93.5002 |
| 2      | 13.794        | MM R | 0.3266      | 953.70898    | 48.66211     | 6.4998  |

## 3ai

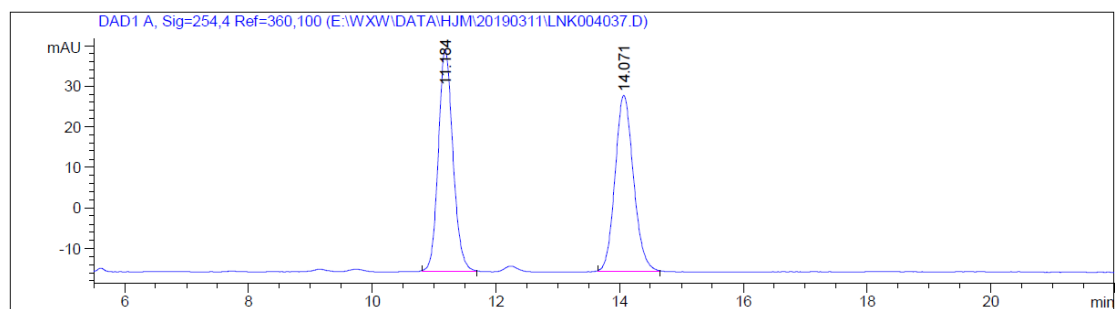

| Peak # | RetTime [min] | Type | Width [min] | Area [mAU*s] | Height [mAU] | Area %  |
|--------|---------------|------|-------------|--------------|--------------|---------|
| 1      | 11.184        | BB   | 0.2539      | 899.09448    | 54.65664     | 49.9382 |
| 2      | 14.071        | BB   | 0.3200      | 901.32080    | 43.44766     | 50.0618 |

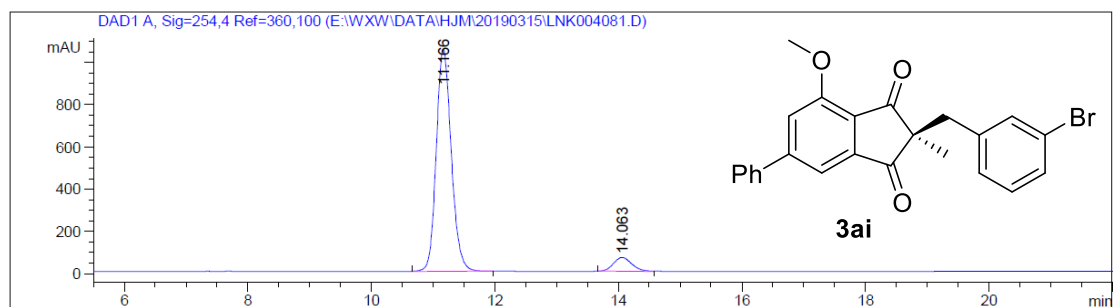

| Peak # | RetTime [min] | Type | Width [min] | Area [mAU*s] | Height [mAU] | Area %  |
|--------|---------------|------|-------------|--------------|--------------|---------|
| 1      | 11.166        | BB   | 0.2612      | 1.77721e4    | 1051.33655   | 93.0764 |
| 2      | 14.063        | MM R | 0.3387      | 1322.00061   | 65.04708     | 6.9236  |

### 3aj

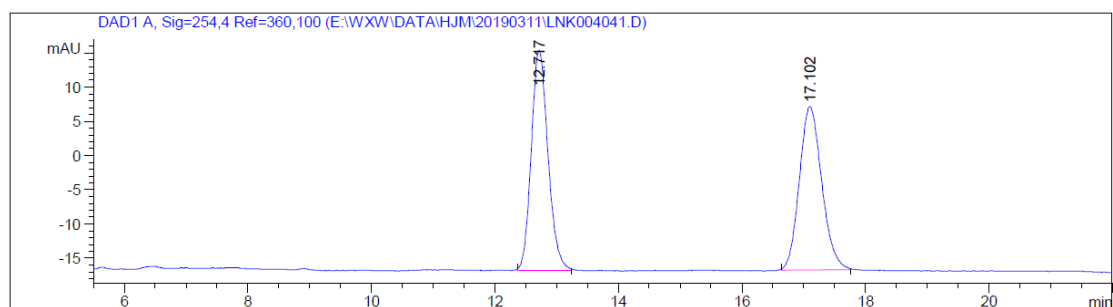

| Peak # | RetTime [min] | Type | Width [min] | Area [mAU*s] | Height [mAU] | Area %  |
|--------|---------------|------|-------------|--------------|--------------|---------|
| 1      | 12.717        | BB   | 0.2891      | 603.00537    | 32.10683     | 50.0340 |
| 2      | 17.102        | BB   | 0.3863      | 602.18518    | 23.87220     | 49.9660 |

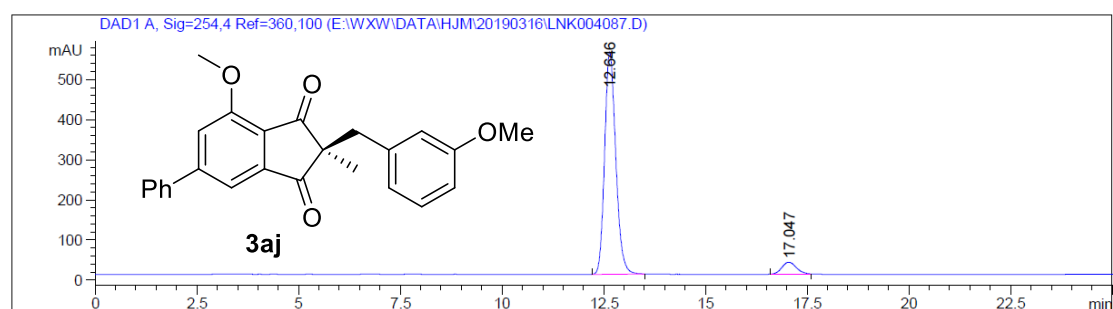

| Peak # | RetTime [min] | Type | Width [min] | Area [mAU*s] | Height [mAU] | Area %  |
|--------|---------------|------|-------------|--------------|--------------|---------|
| 1      | 12.646        | BB   | 0.2925      | 1.05453e4    | 553.03259    | 93.5448 |
| 2      | 17.047        | MM R | 0.4086      | 727.68872    | 29.68270     | 6.4552  |



### 3ak

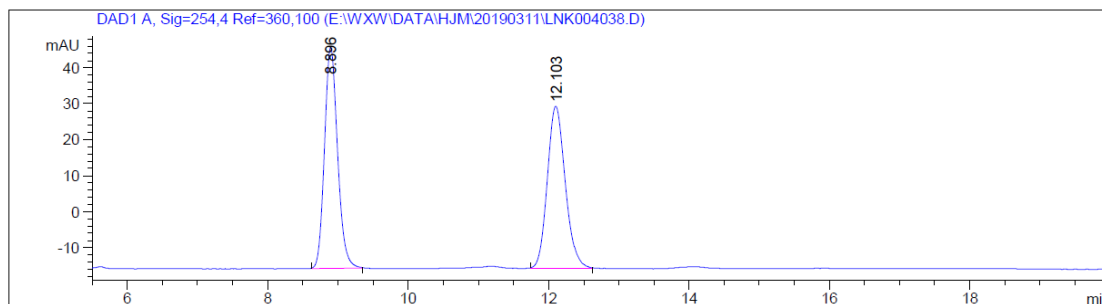

| Peak # | RetTime [min] | Type | Width [min] | Area [mAU*s] | Height [mAU] | Area %  |
|--------|---------------|------|-------------|--------------|--------------|---------|
| 1      | 8.896         | BB   | 0.2026      | 804.85364    | 61.51379     | 50.0415 |
| 2      | 12.103        | BB   | 0.2741      | 803.51874    | 45.05550     | 49.9585 |

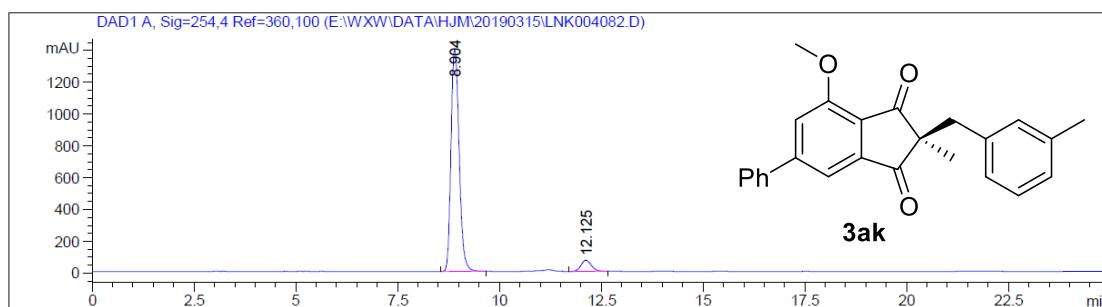

| Peak # | RetTime [min] | Type | Width [min] | Area [mAU*s] | Height [mAU] | Area %  |
|--------|---------------|------|-------------|--------------|--------------|---------|
| 1      | 8.904         | BB   | 0.2189      | 1.94256e4    | 1390.80750   | 94.0009 |
| 2      | 12.125        | VB   | 0.2721      | 1239.72974   | 70.19080     | 5.9991  |

### 3al

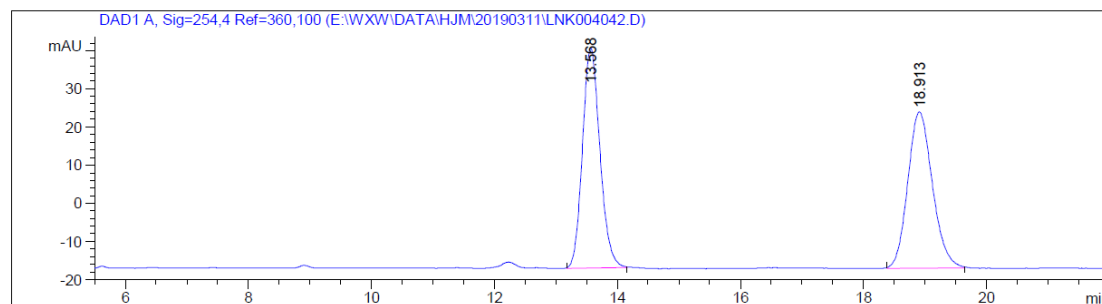

| Peak # | RetTime [min] | Type | Width [min] | Area [mAU*s] | Height [mAU] | Area %  |
|--------|---------------|------|-------------|--------------|--------------|---------|
| 1      | 13.568        | BB   | 0.3019      | 1136.10645   | 57.66617     | 49.9666 |
| 2      | 18.913        | BB   | 0.4239      | 1137.62329   | 40.98212     | 50.0334 |

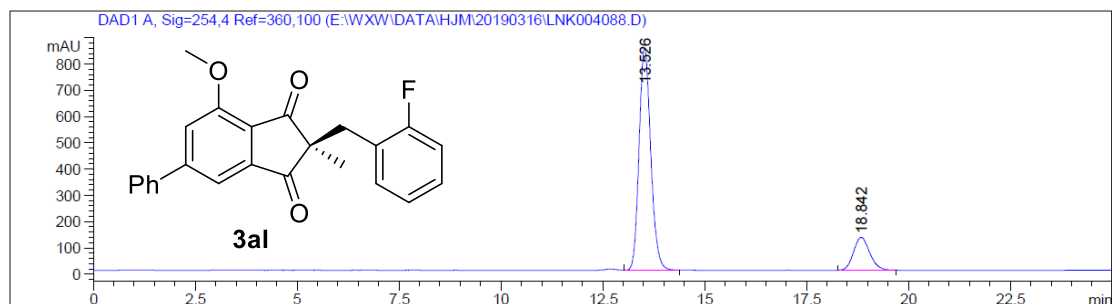

| Peak # | RetTime [min] | Type | Width [min] | Area [mAU*s] | Height [mAU] | Area %  |
|--------|---------------|------|-------------|--------------|--------------|---------|
| 1      | 13.526        | VB   | 0.3092      | 1.68900e4    | 845.15948    | 83.0037 |
| 2      | 18.842        | BB   | 0.4236      | 3458.49048   | 125.46600    | 16.9963 |

### 3am

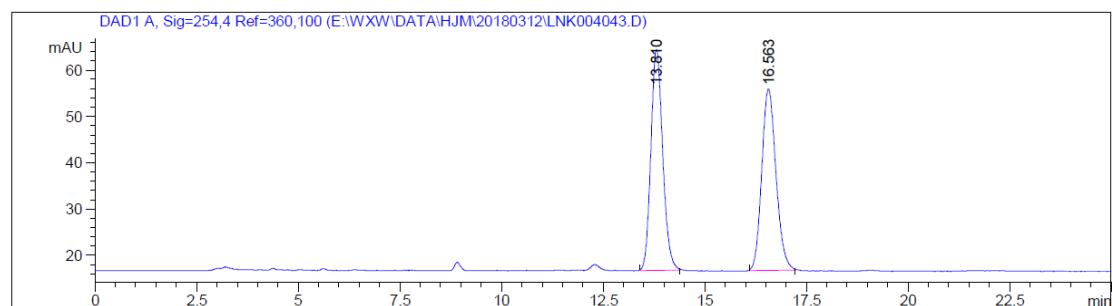

| Peak # | RetTime [min] | Type | Width [min] | Area [mAU*s] | Height [mAU] | Area %  |
|--------|---------------|------|-------------|--------------|--------------|---------|
| 1      | 13.810        | BB   | 0.3138      | 965.65308    | 47.77753     | 50.1804 |
| 2      | 16.563        | BB   | 0.3748      | 958.70898    | 39.27549     | 49.8196 |

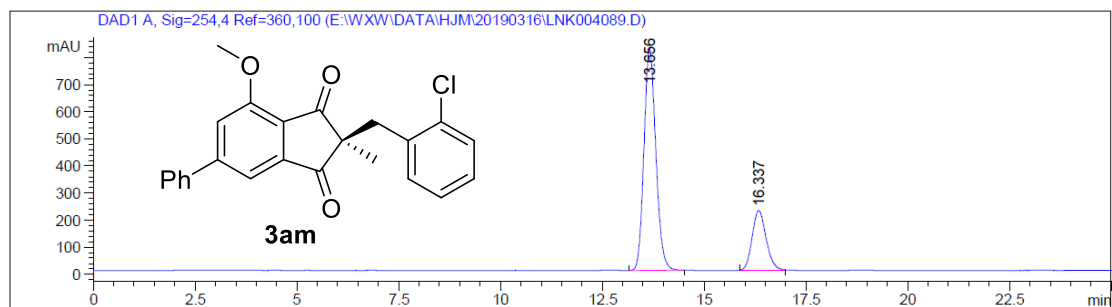

| Peak # | RetTime [min] | Type | Width [min] | Area [mAU*s] | Height [mAU] | Area %  |
|--------|---------------|------|-------------|--------------|--------------|---------|
| 1      | 13.656        | BB   | 0.3146      | 1.66103e4    | 818.96100    | 76.0361 |
| 2      | 16.337        | MM R | 0.3959      | 5235.00781   | 220.37730    | 23.9639 |

### 3an

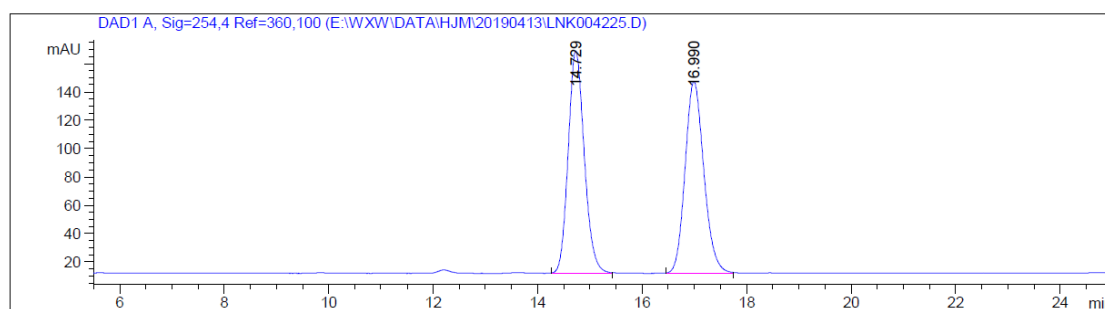

| Peak # | RetTime [min] | Type | Width [min] | Area [mAU*s] | Height [mAU] | Area %  |
|--------|---------------|------|-------------|--------------|--------------|---------|
| 1      | 14.729        | BB   | 0.3299      | 3354.78174   | 156.64880    | 49.8942 |
| 2      | 16.990        | BB   | 0.3828      | 3369.01099   | 135.18442    | 50.1058 |

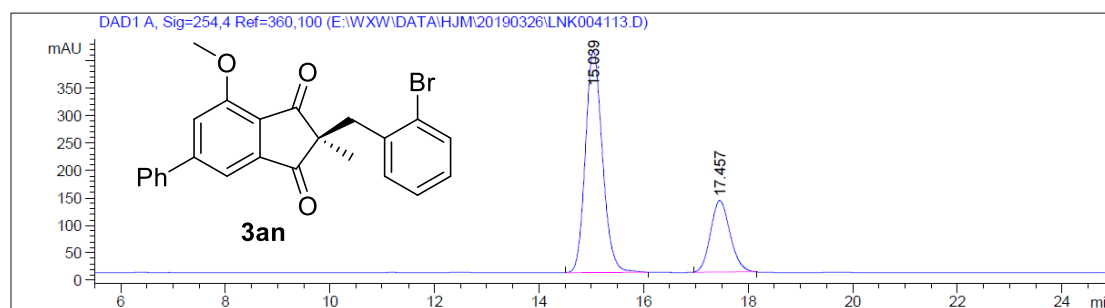

| Peak # | RetTime [min] | Type | Width [min] | Area [mAU*s] | Height [mAU] | Area %  |
|--------|---------------|------|-------------|--------------|--------------|---------|
| 1      | 15.039        | BB   | 0.3507      | 9177.19824   | 404.49304    | 73.1494 |
| 2      | 17.457        | MM R | 0.4313      | 3368.62256   | 130.16016    | 26.8506 |

### 3ao

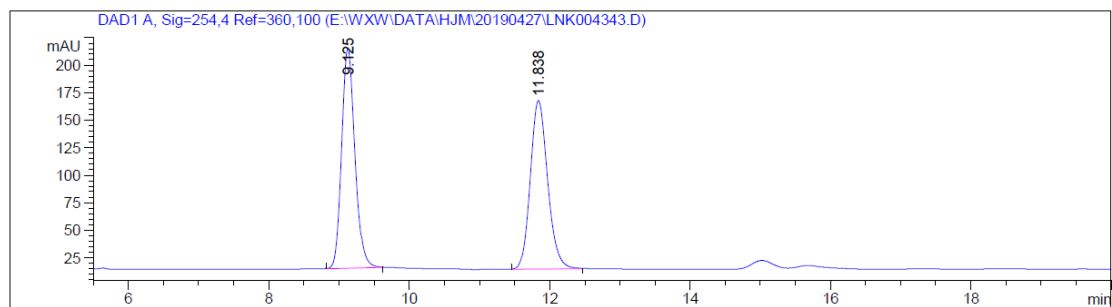

| Peak # | RetTime [min] | Type | Width [min] | Area [mAU*s] | Height [mAU] | Area %  |
|--------|---------------|------|-------------|--------------|--------------|---------|
| 1      | 9.125         | BB   | 0.2015      | 2631.30273   | 199.94556    | 49.9825 |
| 2      | 11.838        | BB   | 0.2649      | 2633.15015   | 152.93456    | 50.0175 |

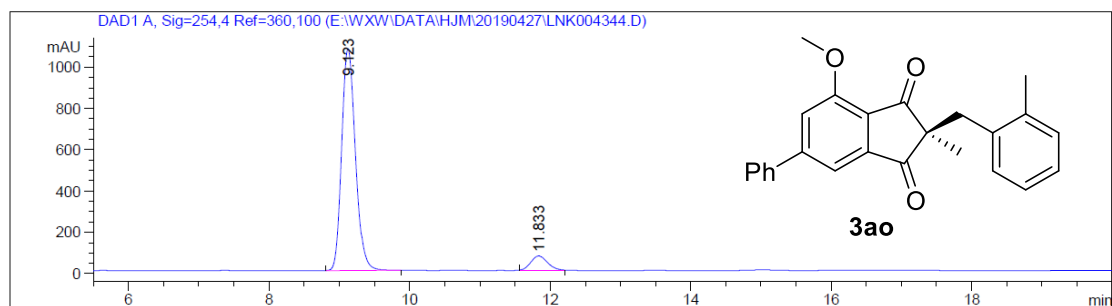

| Peak # | RetTime [min] | Type | Width [min] | Area [mAU*s] | Height [mAU] | Area %  |
|--------|---------------|------|-------------|--------------|--------------|---------|
| 1      | 9.123         | BB   | 0.2133      | 1.46528e4    | 1072.81726   | 92.5232 |
| 2      | 11.833        | MM R | 0.2809      | 1184.08887   | 70.26357     | 7.4768  |

### 3ap

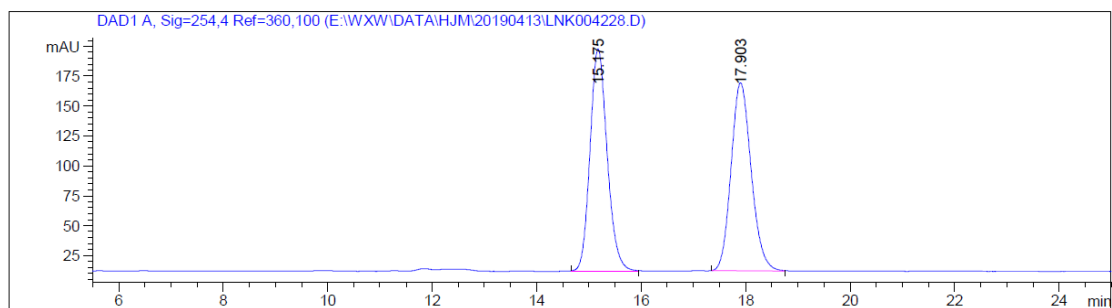

| Peak # | RetTime [min] | Type | Width [min] | Area [mAU*s] | Height [mAU] | Area %  |
|--------|---------------|------|-------------|--------------|--------------|---------|
| 1      | 15.175        | BB   | 0.3519      | 4232.92383   | 185.73996    | 50.1312 |
| 2      | 17.903        | BB   | 0.4124      | 4210.76611   | 157.26924    | 49.8688 |

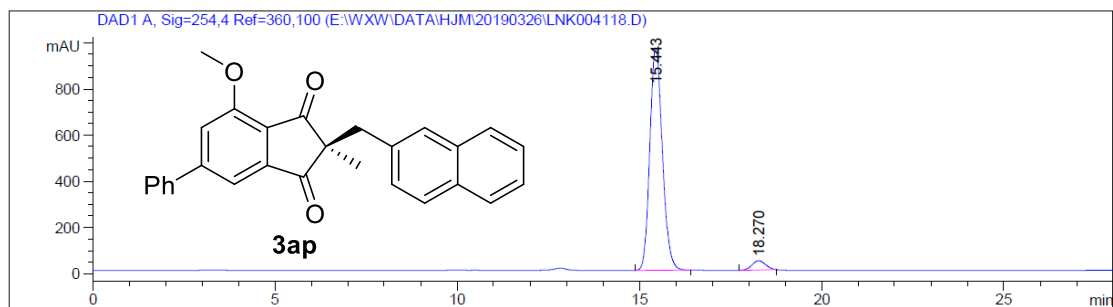

| Peak # | RetTime [min] | Type | Width [min] | Area [mAU*s] | Height [mAU] | Area %  |
|--------|---------------|------|-------------|--------------|--------------|---------|
| 1      | 15.443        | BB   | 0.3718      | 2.30425e4    | 960.89014    | 95.5561 |
| 2      | 18.270        | MM R | 0.4437      | 1071.60303   | 40.24857     | 4.4439  |

### 3aq

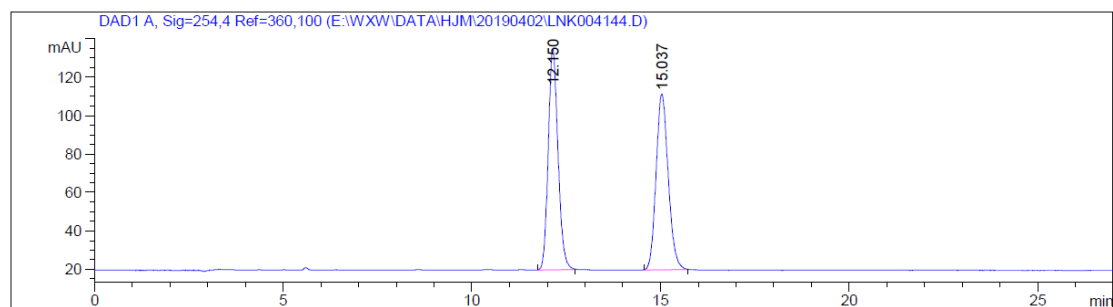

| Peak # | RetTime [min] | Type | Width [min] | Area [mAU*s] | Height [mAU] | Area %  |
|--------|---------------|------|-------------|--------------|--------------|---------|
| 1      | 12.150        | BB   | 0.2761      | 2067.51270   | 114.78390    | 50.1969 |
| 2      | 15.037        | BB   | 0.3455      | 2051.29395   | 91.52007     | 49.8031 |

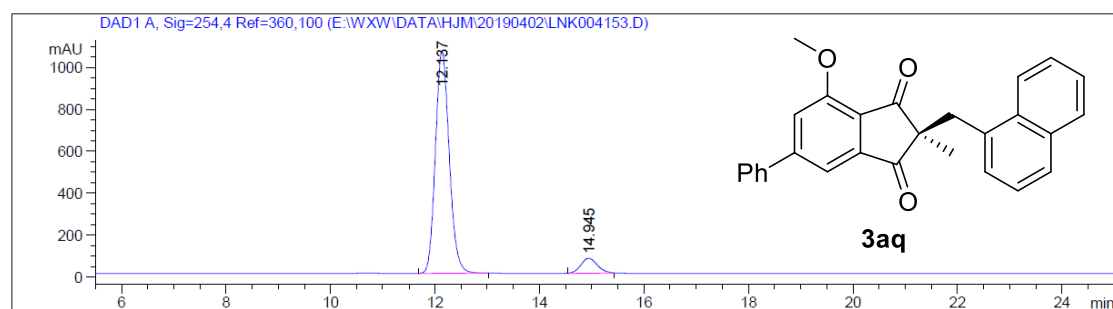

| Peak # | RetTime [min] | Type | Width [min] | Area [mAU*s] | Height [mAU] | Area %  |
|--------|---------------|------|-------------|--------------|--------------|---------|
| 1      | 12.137        | BB   | 0.2850      | 1.94987e4    | 1058.17444   | 92.6392 |
| 2      | 14.945        | MM R | 0.3635      | 1549.30298   | 71.03905     | 7.3608  |

### 3ar

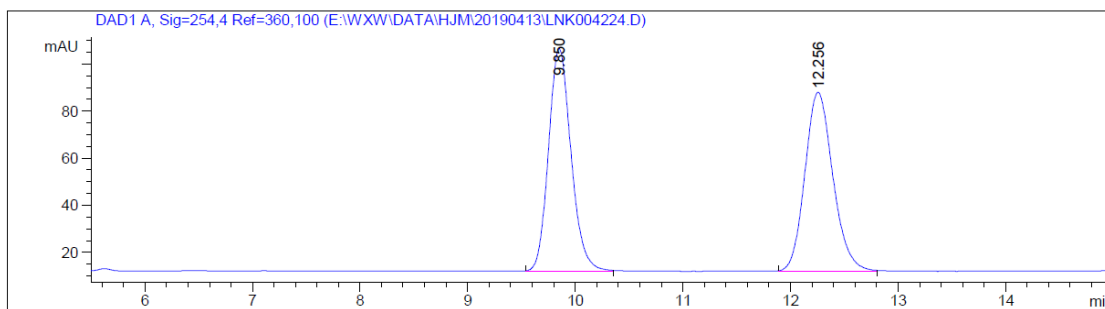

| Peak # | RetTime [min] | Type | Width [min] | Area [mAU*s] | Height [mAU] | Area %  |
|--------|---------------|------|-------------|--------------|--------------|---------|
| 1      | 9.850         | BB   | 0.2231      | 1370.37769   | 94.54195     | 49.9964 |
| 2      | 12.256        | BB   | 0.2786      | 1370.57312   | 75.91089     | 50.0036 |

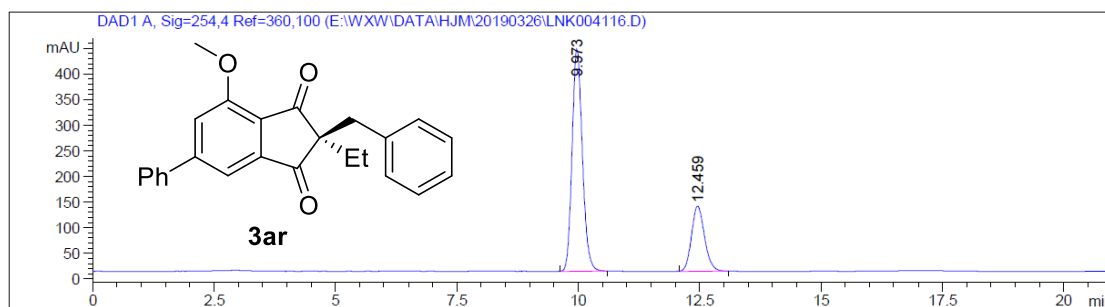

| Peak # | RetTime [min] | Type | Width [min] | Area [mAU*s] | Height [mAU] | Area %  |
|--------|---------------|------|-------------|--------------|--------------|---------|
| 1      | 9.973         | BB   | 0.2283      | 6397.44092   | 433.05740    | 73.0578 |
| 2      | 12.459        | MM R | 0.3091      | 2359.23926   | 127.21201    | 26.9422 |

### 3as

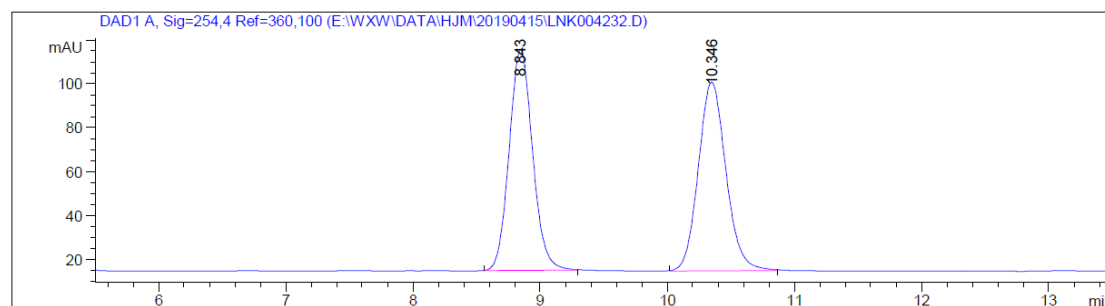

| Peak # | RetTime [min] | Type | Width [min] | Area [mAU*s] | Height [mAU] | Area %  |
|--------|---------------|------|-------------|--------------|--------------|---------|
| 1      | 8.843         | BB   | 0.1979      | 1293.26160   | 100.65012    | 49.9885 |
| 2      | 10.346        | BB   | 0.2338      | 1293.85864   | 85.87302     | 50.0115 |

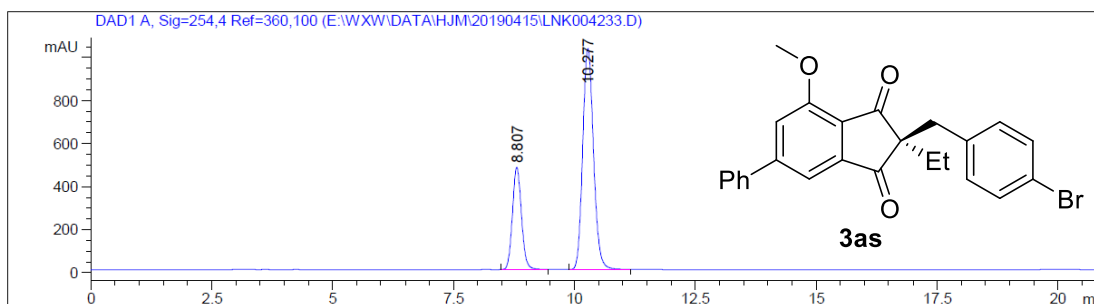

| Peak # | RetTime [min] | Type | Width [min] | Area [mAU*s] | Height [mAU] | Area %  |
|--------|---------------|------|-------------|--------------|--------------|---------|
| 1      | 8.807         | BB   | 0.2018      | 6174.36475   | 474.67734    | 27.9379 |
| 2      | 10.277        | BB   | 0.2412      | 1.59260e4    | 1025.17078   | 72.0621 |

### 3at

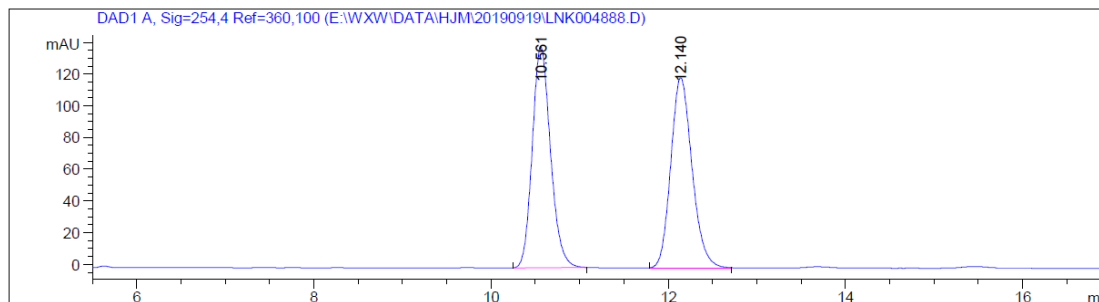

| Peak # | RetTime [min] | Type | Width [min] | Area [mAU*s] | Height [mAU] | Area %  |
|--------|---------------|------|-------------|--------------|--------------|---------|
| 1      | 10.561        | BB   | 0.2211      | 2002.22510   | 139.76830    | 49.9958 |
| 2      | 12.140        | BB   | 0.2567      | 2002.55908   | 120.01533    | 50.0042 |

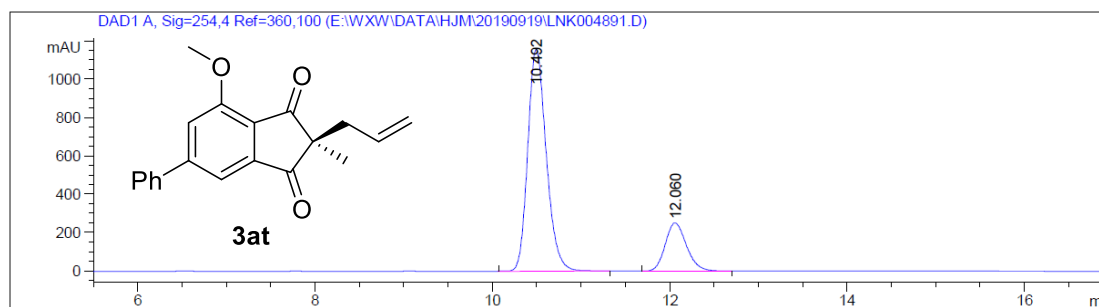

| Peak # | RetTime [min] | Type | Width [min] | Area [mAU*s] | Height [mAU] | Area %  |
|--------|---------------|------|-------------|--------------|--------------|---------|
| 1      | 10.492        | BB   | 0.2236      | 1.68380e4    | 1158.36096   | 79.9961 |
| 2      | 12.060        | BB   | 0.2568      | 4210.53662   | 252.23546    | 20.0039 |

### 3au

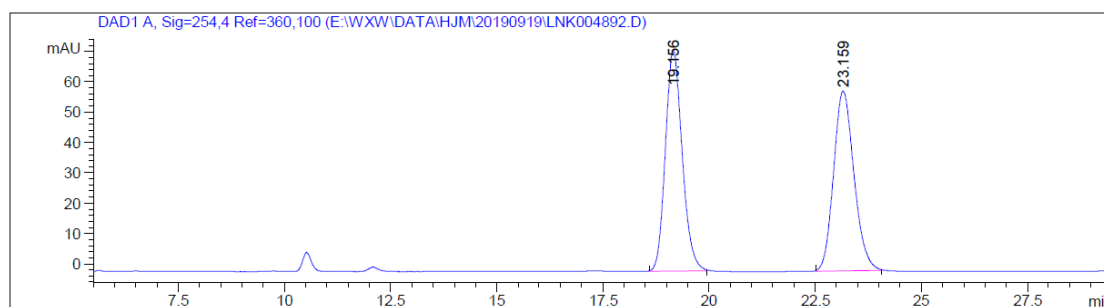

| Peak # | RetTime [min] | Type | Width [min] | Area [mAU*s] | Height [mAU] | Area %  |
|--------|---------------|------|-------------|--------------|--------------|---------|
| 1      | 19.156        | BB   | 0.4236      | 2004.57068   | 72.71276     | 50.3054 |
| 2      | 23.159        | BB   | 0.5143      | 1980.22974   | 59.18496     | 49.6946 |

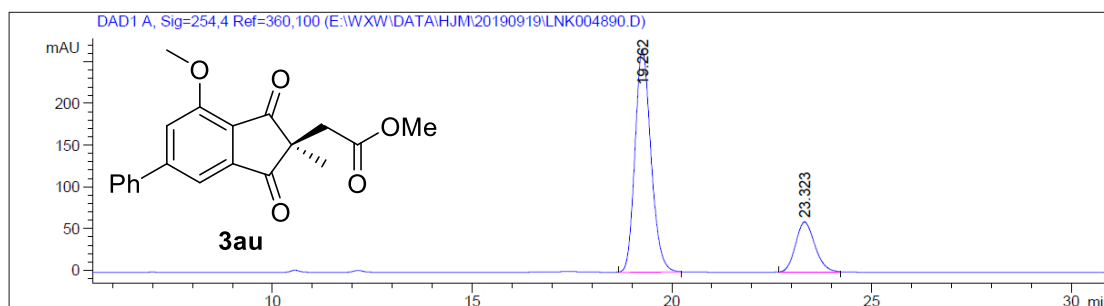

| Peak # | RetTime [min] | Type | Width [min] | Area [mAU*s] | Height [mAU] | Area %  |
|--------|---------------|------|-------------|--------------|--------------|---------|
| 1      | 19.262        | BB   | 0.4310      | 7427.23779   | 266.65482    | 78.6371 |
| 2      | 23.323        | BB   | 0.5189      | 2017.71204   | 59.90947     | 21.3629 |

### 3av



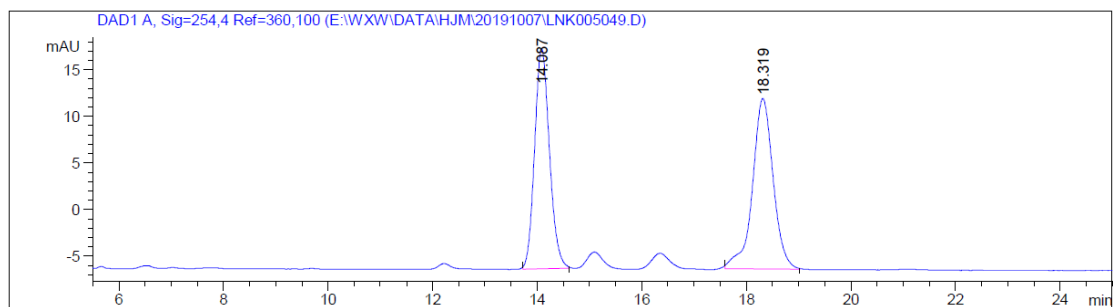

| Peak # | RetTime [min] | Type | Width [min] | Area [mAU*s] | Height [mAU] | Area %  |
|--------|---------------|------|-------------|--------------|--------------|---------|
| 1      | 14.087        | BB   | 0.3038      | 465.16116    | 23.61509     | 48.0966 |
| 2      | 18.319        | BB   | 0.4149      | 501.97745    | 18.25272     | 51.9034 |

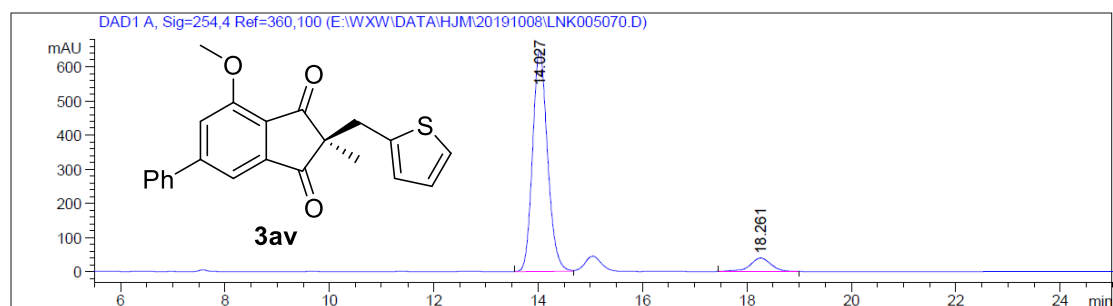

| Peak # | RetTime [min] | Type | Width [min] | Area [mAU*s] | Height [mAU] | Area %  |
|--------|---------------|------|-------------|--------------|--------------|---------|
| 1      | 14.027        | BV   | 0.3061      | 1.28820e4    | 647.44153    | 92.0418 |
| 2      | 18.261        | BB   | 0.4236      | 1113.81140   | 39.66364     | 7.9582  |

## 3ba

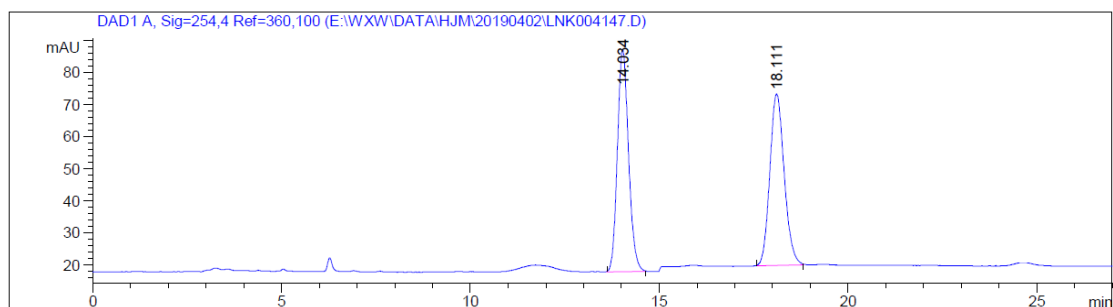

| Peak # | RetTime [min] | Type | Width [min] | Area [mAU*s] | Height [mAU] | Area %  |
|--------|---------------|------|-------------|--------------|--------------|---------|
| 1      | 14.034        | BB   | 0.3168      | 1416.66223   | 69.22543     | 49.9749 |
| 2      | 18.111        | BB   | 0.4112      | 1418.08557   | 53.50586     | 50.0251 |

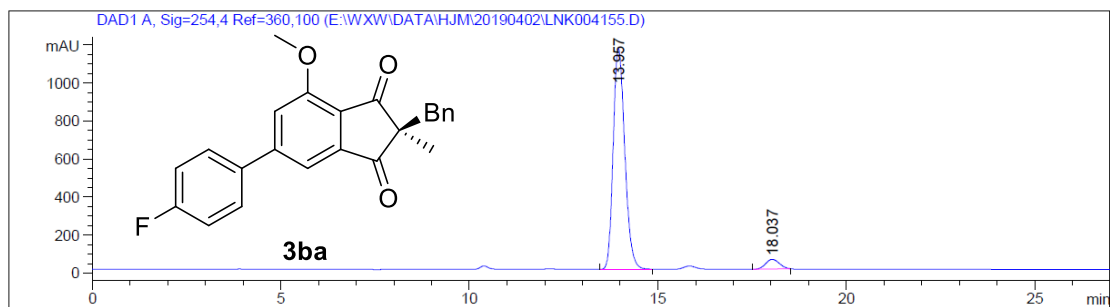

| Peak # | RetTime [min] | Type | Width [min] | Area [mAU*s] | Height [mAU] | Area %  |
|--------|---------------|------|-------------|--------------|--------------|---------|
| 1      | 13.957        | BB   | 0.3334      | 2.48810e4    | 1163.86755   | 94.9314 |
| 2      | 18.037        | MM R | 0.4258      | 1328.45215   | 52.00061     | 5.0686  |

### 3ca

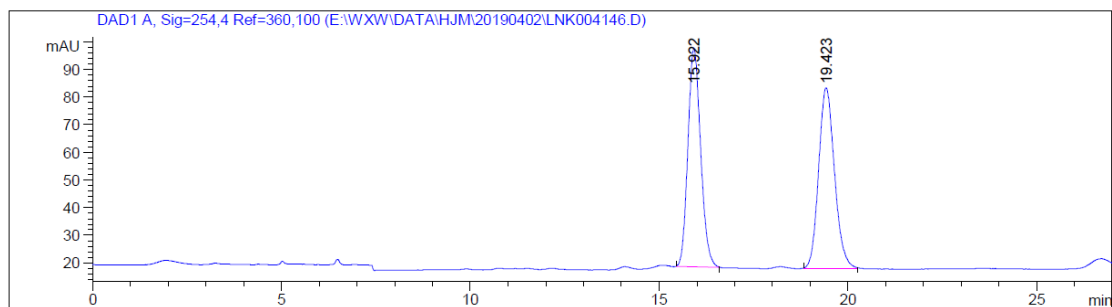

| Peak # | RetTime [min] | Type | Width [min] | Area [mAU*s] | Height [mAU] | Area %  |
|--------|---------------|------|-------------|--------------|--------------|---------|
| 1      | 15.922        | BB   | 0.3638      | 1858.69202   | 79.21178     | 49.3760 |
| 2      | 19.423        | BB   | 0.4518      | 1905.66833   | 65.42010     | 50.6240 |

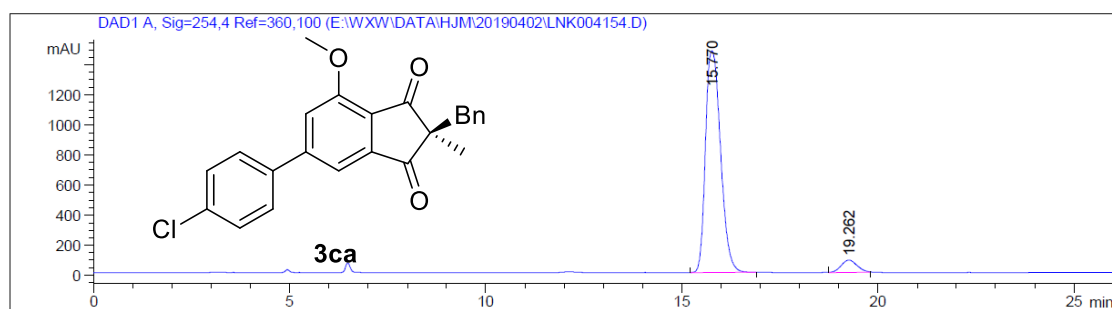

| Peak # | RetTime [min] | Type | Width [min] | Area [mAU*s] | Height [mAU] | Area %  |
|--------|---------------|------|-------------|--------------|--------------|---------|
| 1      | 15.770        | BB   | 0.4218      | 3.93744e4    | 1473.06665   | 94.5213 |
| 2      | 19.262        | MM R | 0.4669      | 2282.25146   | 81.46192     | 5.4787  |

### 3da

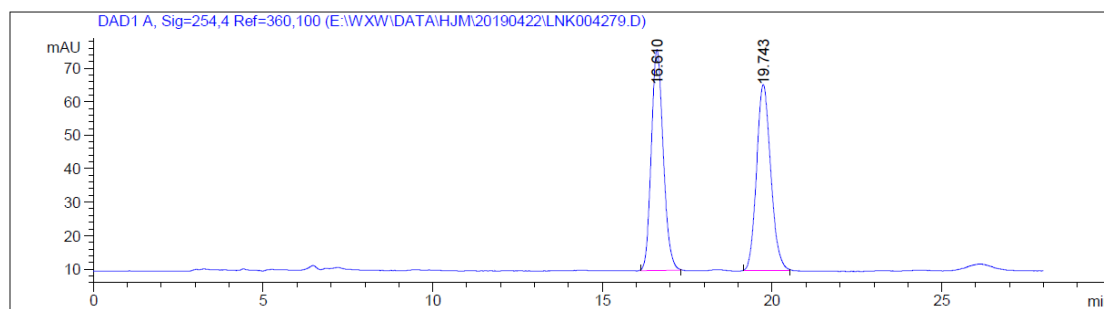

| Peak # | RetTime [min] | Type | Width [min] | Area [mAU*s] | Height [mAU] | Area %  |
|--------|---------------|------|-------------|--------------|--------------|---------|
| 1      | 16.610        | BB   | 0.3788      | 1612.69763   | 66.07236     | 49.9195 |
| 2      | 19.743        | BB   | 0.4497      | 1617.89771   | 55.55811     | 50.0805 |

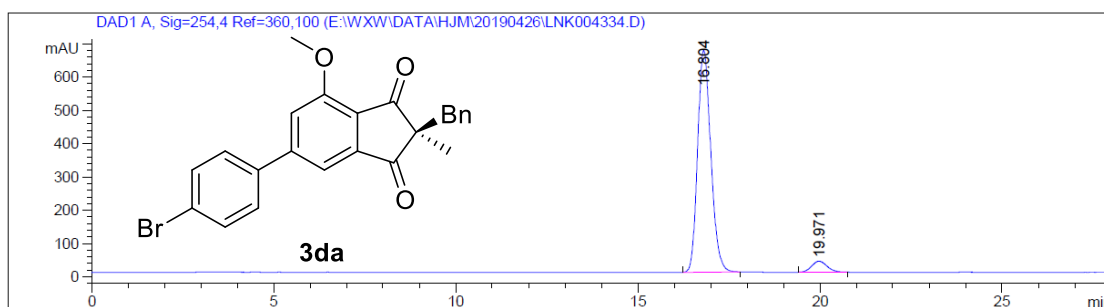

| Peak # | RetTime [min] | Type | Width [min] | Area [mAU*s] | Height [mAU] | Area %  |
|--------|---------------|------|-------------|--------------|--------------|---------|
| 1      | 16.804        | BB   | 0.3922      | 1.68102e4    | 666.58813    | 94.5015 |
| 2      | 19.971        | BB   | 0.4502      | 978.09106    | 33.14847     | 5.4985  |

### 3ea

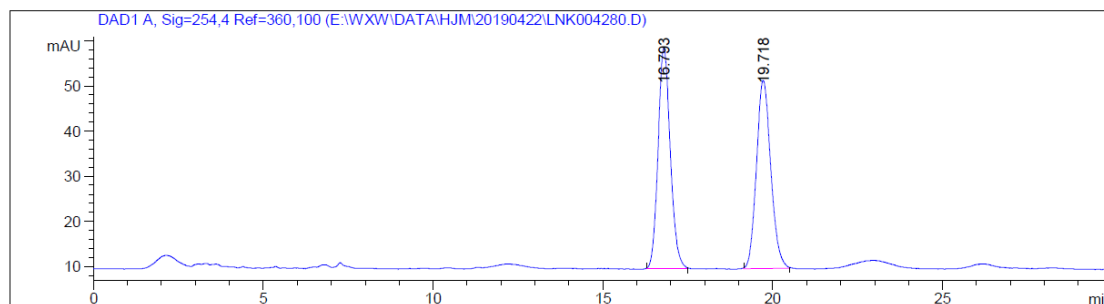

| Peak # | RetTime [min] | Type | Width [min] | Area [mAU*s] | Height [mAU] | Area %  |
|--------|---------------|------|-------------|--------------|--------------|---------|
| 1      | 16.793        | BB   | 0.3841      | 1225.02576   | 48.93368     | 50.0777 |
| 2      | 19.718        | BB   | 0.4499      | 1221.22412   | 41.66651     | 49.9223 |

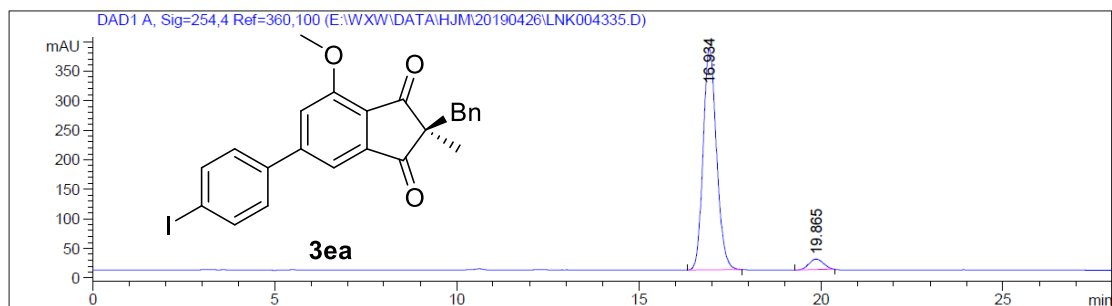

| Peak # | RetTime [min] | Type | Width [min] | Area [mAU*s] | Height [mAU] | Area %  |
|--------|---------------|------|-------------|--------------|--------------|---------|
| 1      | 16.934        | BB   | 0.3966      | 9599.82422   | 375.02945    | 95.0424 |
| 2      | 19.865        | MM R | 0.4639      | 500.74640    | 17.99135     | 4.9576  |

### 3fa

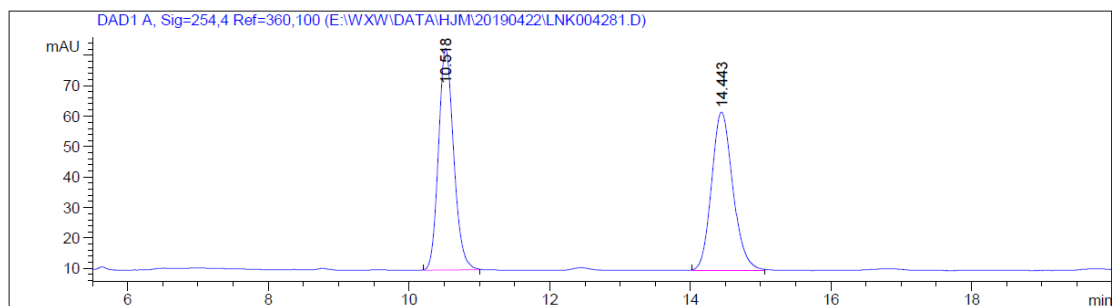

| Peak # | RetTime [min] | Type | Width [min] | Area [mAU*s] | Height [mAU] | Area %  |
|--------|---------------|------|-------------|--------------|--------------|---------|
| 1      | 10.518        | BB   | 0.2341      | 1098.27478   | 72.74692     | 50.1511 |
| 2      | 14.443        | BB   | 0.3251      | 1091.65613   | 51.95306     | 49.8489 |

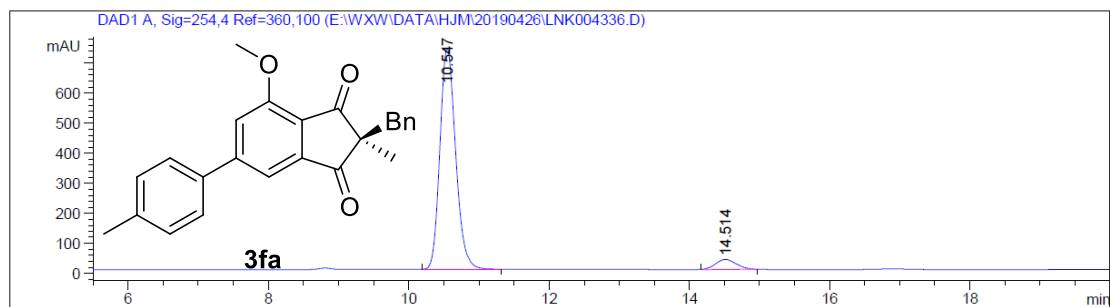

| Peak # | RetTime [min] | Type | Width [min] | Area [mAU*s] | Height [mAU] | Area %  |
|--------|---------------|------|-------------|--------------|--------------|---------|
| 1      | 10.547        | BB   | 0.2432      | 1.15518e4    | 735.74011    | 94.5226 |
| 2      | 14.514        | MM R | 0.3391      | 669.40955    | 32.90365     | 5.4774  |

### 3ga

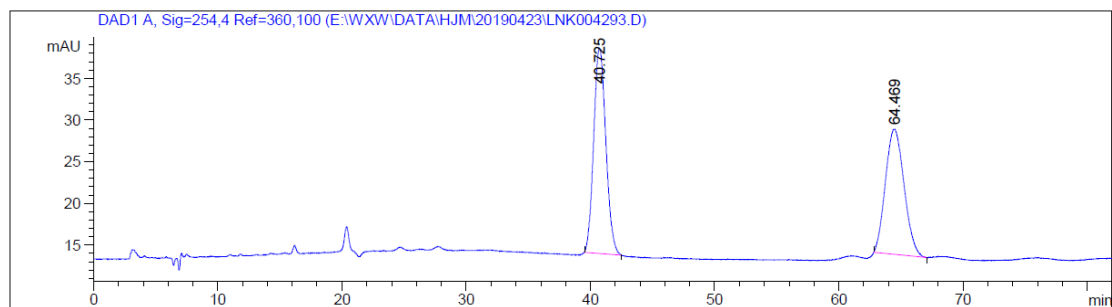

| Peak # | RetTime [min] | Type | Width [min] | Area [mAU*s] | Height [mAU] | Area %  |
|--------|---------------|------|-------------|--------------|--------------|---------|
| 1      | 40.725        | BB   | 0.8666      | 1676.13916   | 24.60958     | 51.6828 |
| 2      | 64.469        | BB   | 1.2287      | 1566.98633   | 15.02503     | 48.3172 |

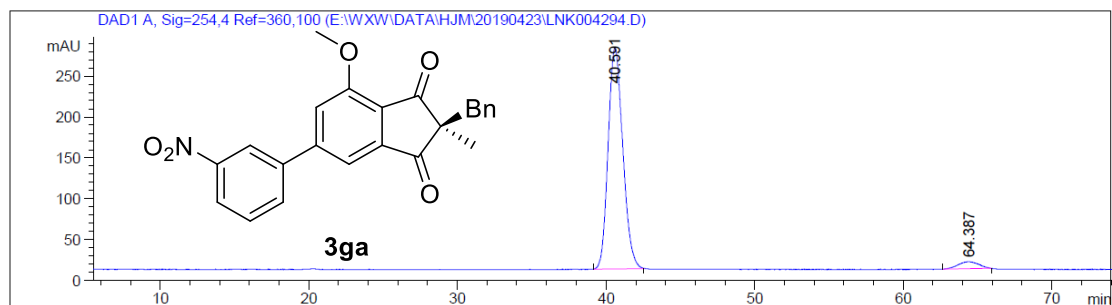

| Peak # | RetTime [min] | Type | Width [min] | Area [mAU*s] | Height [mAU] | Area %  |
|--------|---------------|------|-------------|--------------|--------------|---------|
| 1      | 40.591        | BB   | 1.0661      | 1.86156e4    | 270.78271    | 95.9210 |
| 2      | 64.387        | MM R | 1.5979      | 791.61713    | 8.25674      | 4.0790  |

### 3ha

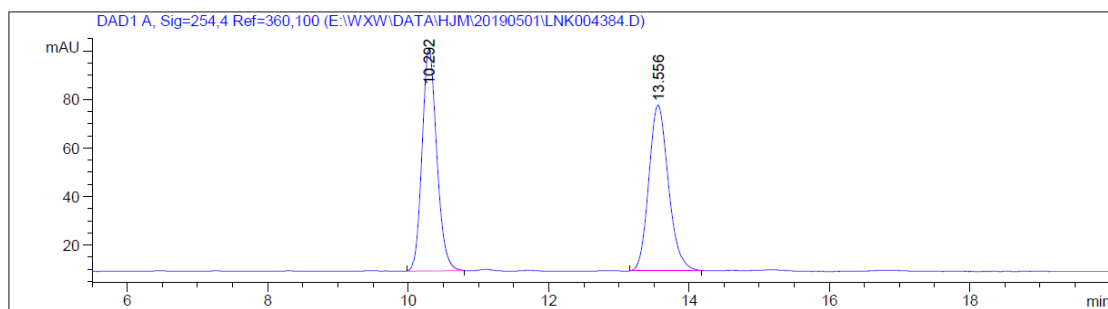

| Peak # | RetTime [min] | Type | Width [min] | Area [mAU*s] | Height [mAU] | Area %  |
|--------|---------------|------|-------------|--------------|--------------|---------|
| 1      | 10.292        | BB   | 0.2254      | 1342.79944   | 91.37619     | 50.0877 |
| 2      | 13.556        | BB   | 0.3006      | 1338.09961   | 68.30328     | 49.9123 |

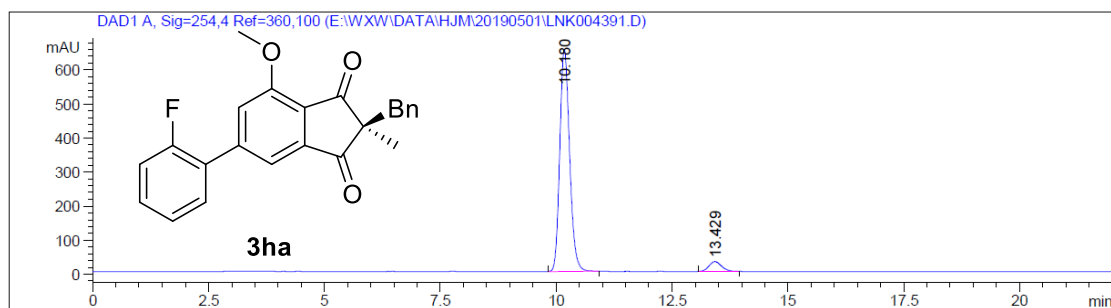

| Peak # | RetTime [min] | Type | Width [min] | Area [mAU*s] | Height [mAU] | Area %  |
|--------|---------------|------|-------------|--------------|--------------|---------|
| 1      | 10.180        | BB   | 0.2275      | 9590.61035   | 652.34155    | 94.5557 |
| 2      | 13.429        | BB   | 0.2925      | 552.20898    | 28.94934     | 5.4443  |

### 3ia

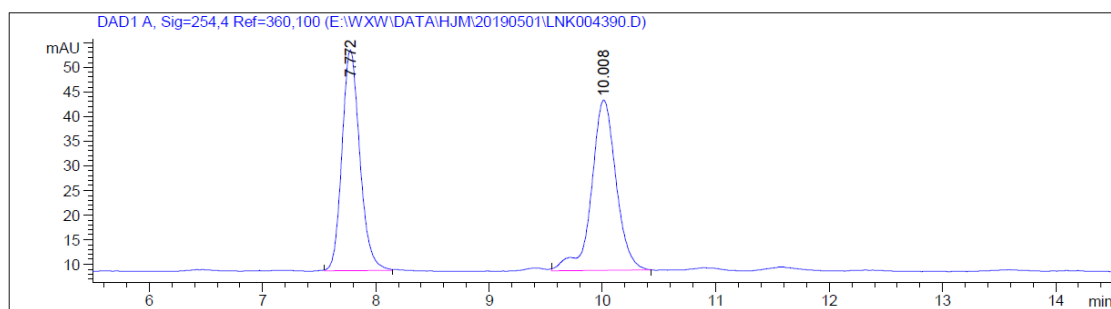

| Peak # | RetTime [min] | Type | Width [min] | Area [mAU*s] | Height [mAU] | Area %  |
|--------|---------------|------|-------------|--------------|--------------|---------|
| 1      | 7.772         | BB   | 0.1695      | 489.24783    | 44.76540     | 48.4138 |
| 2      | 10.008        | BB   | 0.2279      | 521.30603    | 34.58310     | 51.5862 |

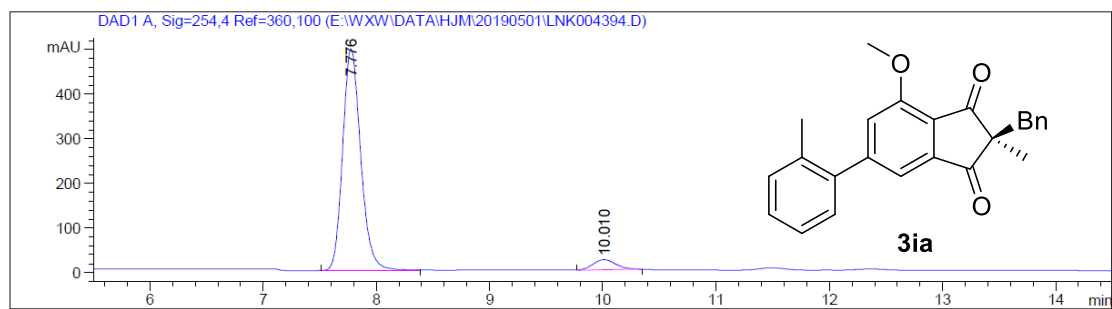

| Peak # | RetTime [min] | Type | Width [min] | Area [mAU*s] | Height [mAU] | Area %  |
|--------|---------------|------|-------------|--------------|--------------|---------|
| 1      | 7.776         | BB   | 0.1709      | 5482.39795   | 496.16434    | 94.6439 |
| 2      | 10.010        | MM R | 0.2300      | 310.26331    | 22.48162     | 5.3561  |

### 3ja

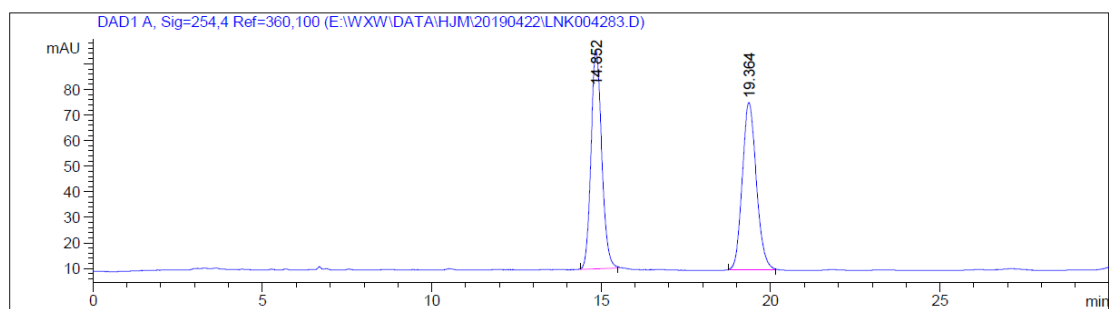

| Peak # | RetTime [min] | Type | Width [min] | Area [mAU*s] | Height [mAU] | Area %  |
|--------|---------------|------|-------------|--------------|--------------|---------|
| 1      | 14.852        | BB   | 0.3393      | 1868.81567   | 85.38871     | 49.7122 |
| 2      | 19.364        | BB   | 0.4432      | 1890.45337   | 65.41597     | 50.2878 |

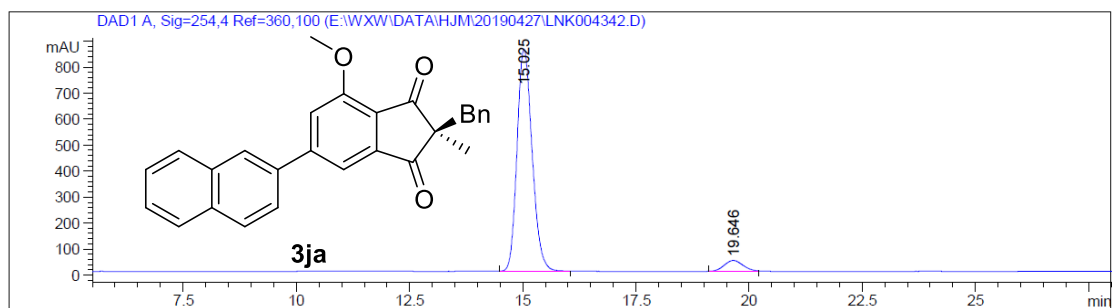

| Peak # | RetTime [min] | Type | Width [min] | Area [mAU*s] | Height [mAU] | Area %  |
|--------|---------------|------|-------------|--------------|--------------|---------|
| 1      | 15.025        | BB   | 0.3627      | 1.98147e4    | 854.06714    | 94.5417 |
| 2      | 19.646        | MM R | 0.4688      | 1143.99573   | 40.67279     | 5.4583  |

### 3ka

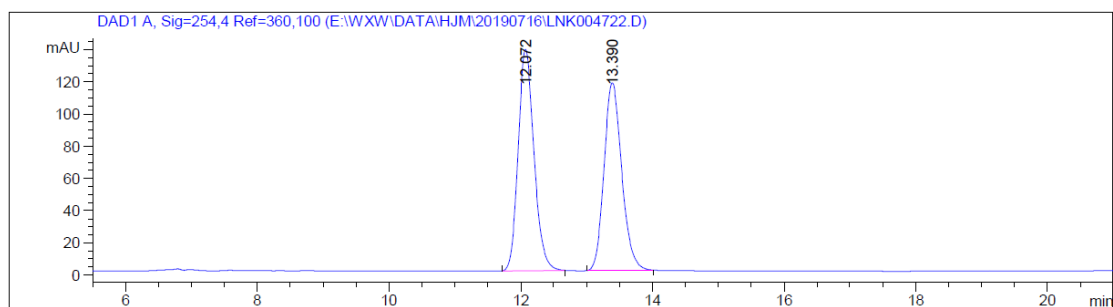

| Peak # | RetTime [min] | Type | Width [min] | Area [mAU*s] | Height [mAU] | Area %  |
|--------|---------------|------|-------------|--------------|--------------|---------|
| 1      | 12.072        | BB   | 0.2575      | 2304.64722   | 137.53784    | 51.3623 |
| 2      | 13.390        | BB   | 0.2860      | 2182.39014   | 116.77705    | 48.6377 |

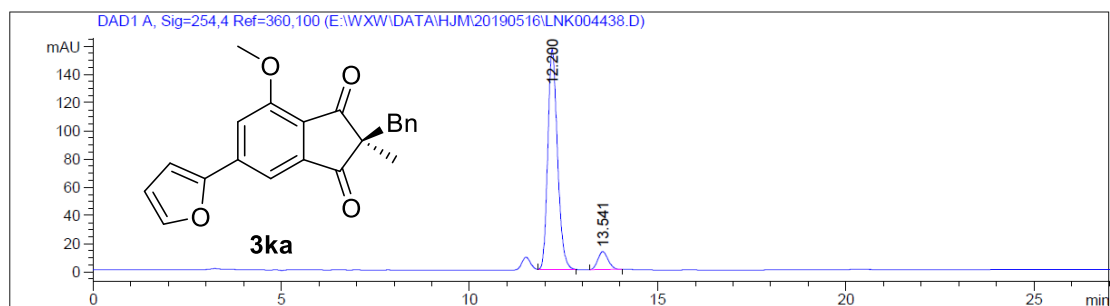

| Peak # | RetTime [min] | Type | Width [min] | Area [mAU*s] | Height [mAU] | Area %  |
|--------|---------------|------|-------------|--------------|--------------|---------|
| 1      | 12.200        | VB   | 0.2732      | 2804.24878   | 156.37102    | 92.0984 |
| 2      | 13.541        | BB   | 0.2943      | 240.59225    | 12.74389     | 7.9016  |

### 3la



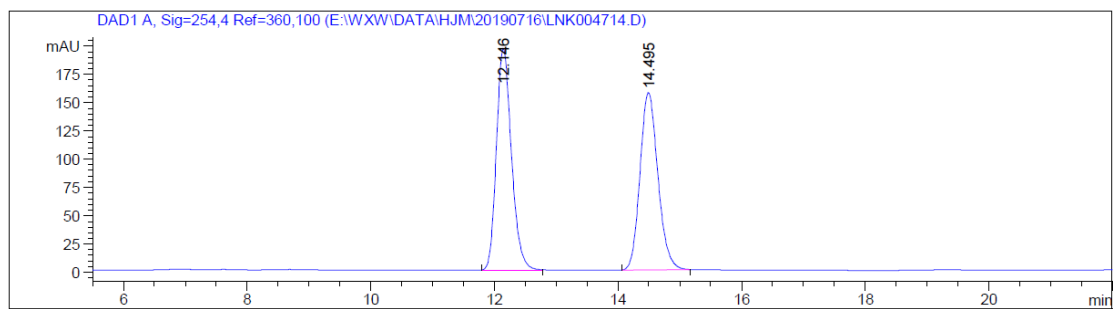

| Peak # | RetTime [min] | Type | Width [min] | Area [mAU*s] | Height [mAU] | Area %  |
|--------|---------------|------|-------------|--------------|--------------|---------|
| 1      | 12.146        | BB   | 0.2611      | 3313.34668   | 196.10257    | 51.2073 |
| 2      | 14.495        | BB   | 0.3108      | 3157.10571   | 156.86118    | 48.7927 |

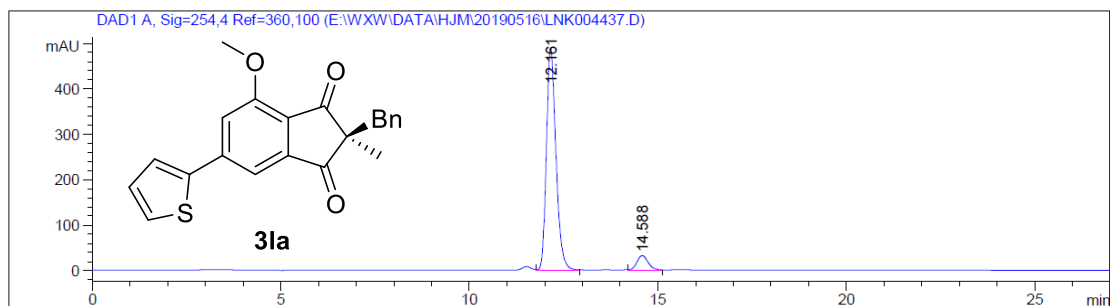

| Peak # | RetTime [min] | Type | Width [min] | Area [mAU*s] | Height [mAU] | Area %  |
|--------|---------------|------|-------------|--------------|--------------|---------|
| 1      | 12.161        | VB   | 0.2682      | 8540.95508   | 487.87503    | 92.9257 |
| 2      | 14.588        | BB   | 0.3147      | 650.20807    | 31.78100     | 7.0743  |

4

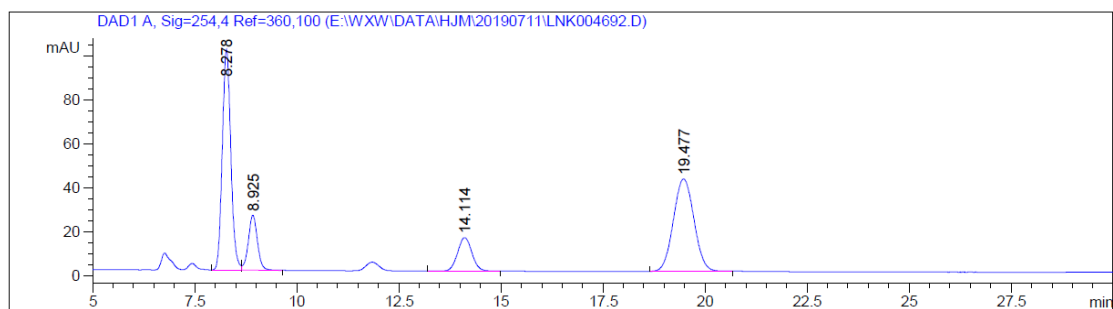

| Peak # | RetTime [min] | Type | Width [min] | Area [mAU*s] | Height [mAU] | Area %  |
|--------|---------------|------|-------------|--------------|--------------|---------|
| 1      | 8.278         | VV   | 0.2261      | 1462.57483   | 100.33953    | 39.5069 |
| 2      | 8.925         | VB   | 0.2418      | 389.77615    | 25.01888     | 10.5286 |
| 3      | 14.114        | BB   | 0.3802      | 370.96924    | 15.23041     | 10.0206 |
| 4      | 19.477        | BB   | 0.5536      | 1478.75818   | 42.11973     | 39.9440 |

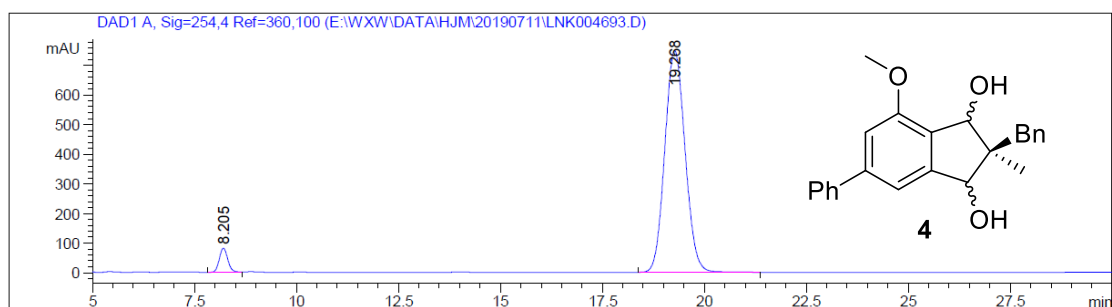

| Peak # | RetTime [min] | Type | Width [min] | Area [mAU*s] | Height [mAU] | Area %  |
|--------|---------------|------|-------------|--------------|--------------|---------|
| 1      | 8.205         | VV   | 0.2251      | 1180.63342   | 81.47739     | 4.3574  |
| 2      | 19.268        | BB   | 0.5438      | 2.59142e4    | 748.69293    | 95.6426 |

5

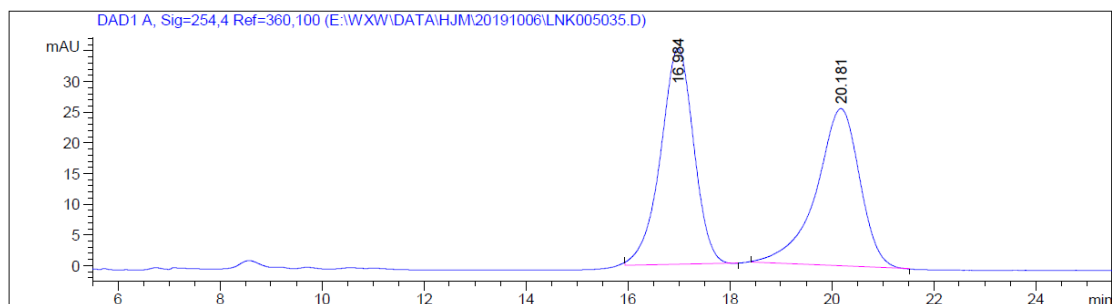

| Peak # | RetTime [min] | Type | Width [min] | Area [mAU*s] | Height [mAU] | Area %  |
|--------|---------------|------|-------------|--------------|--------------|---------|
| 1      | 16.984        | BB   | 0.6828      | 1586.88794   | 35.14643     | 51.1262 |
| 2      | 20.181        | MM R | 0.9870      | 1516.97412   | 25.61695     | 48.8738 |

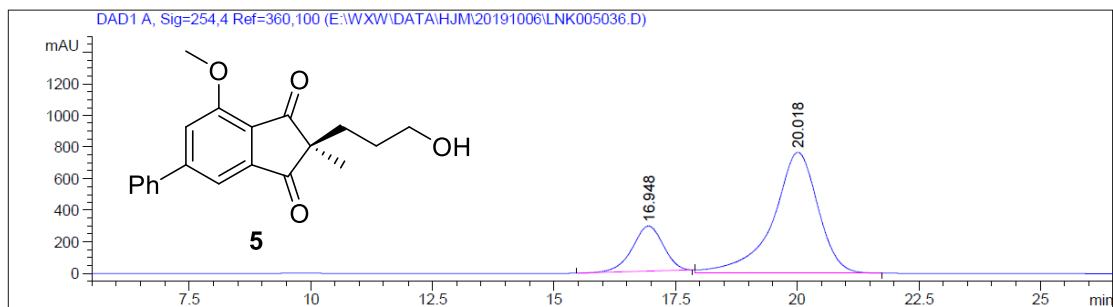

| Peak # | RetTime [min] | Type | Width [min] | Area [mAU*s] | Height [mAU] | Area %  |
|--------|---------------|------|-------------|--------------|--------------|---------|
| 1      | 16.948        | MM R | 0.7399      | 1.26842e4    | 285.73050    | 20.3894 |
| 2      | 20.018        | VB   | 0.9585      | 4.95255e4    | 765.77808    | 79.6106 |

6

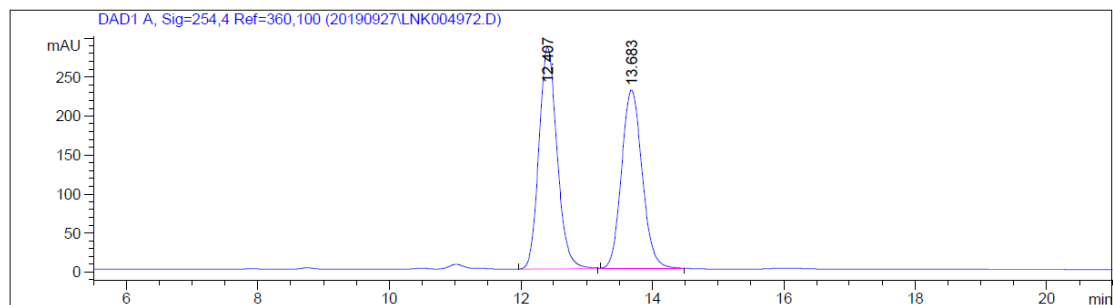

| Peak # | RetTime [min] | Type | Width [min] | Area [mAU*s] | Height [mAU] | Area %  |
|--------|---------------|------|-------------|--------------|--------------|---------|
| 1      | 12.407        | BB   | 0.2965      | 5466.01904   | 284.03055    | 52.1984 |
| 2      | 13.683        | BB   | 0.3408      | 5005.60547   | 229.19531    | 47.8016 |

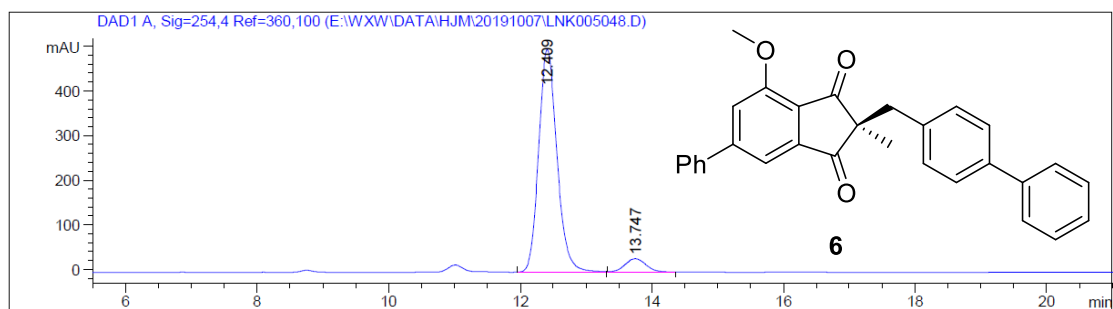

| Peak # | RetTime [min] | Type | Width [min] | Area [mAU*s] | Height [mAU] | Area %  |
|--------|---------------|------|-------------|--------------|--------------|---------|
| 1      | 12.409        | BB   | 0.3001      | 9662.10547   | 498.62762    | 93.4774 |
| 2      | 13.747        | BB   | 0.3484      | 674.19116    | 30.21092     | 6.5226  |

7

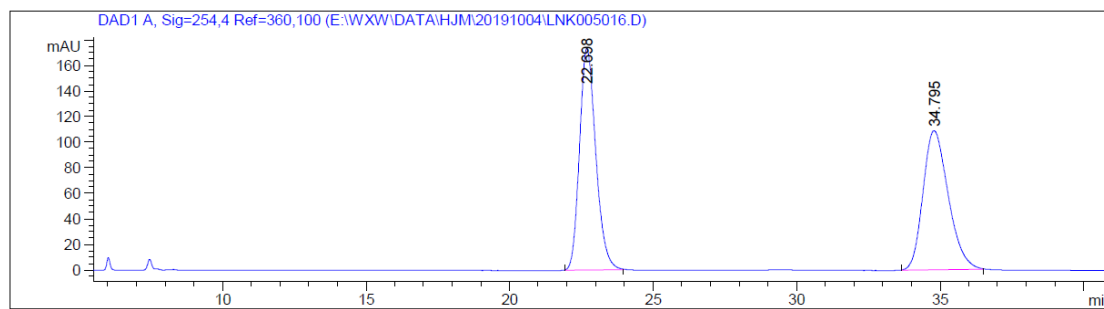

| Peak # | RetTime [min] | Type | Width [min] | Area [mAU*s] | Height [mAU] | Area %  |
|--------|---------------|------|-------------|--------------|--------------|---------|
| 1      | 22.698        | BB   | 0.6089      | 6847.92285   | 173.32408    | 50.6745 |
| 2      | 34.795        | BB   | 0.9451      | 6665.63477   | 108.75040    | 49.3255 |

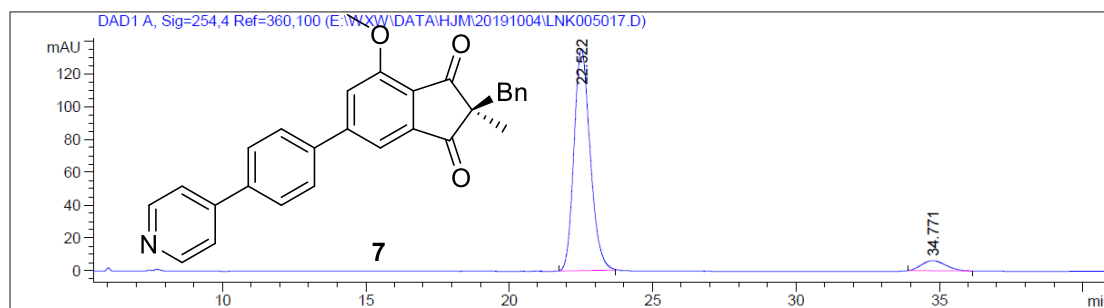

| Peak # | RetTime [min] | Type | Width [min] | Area [mAU*s] | Height [mAU] | Area %  |
|--------|---------------|------|-------------|--------------|--------------|---------|
| 1      | 22.522        | BB   | 0.6066      | 5305.90137   | 134.97458    | 93.4958 |
| 2      | 34.771        | BB   | 0.7966      | 369.11435    | 6.27165      | 6.5042  |
